# Supplementary material
Source: PubMed Central journal article supplement (PMC3964595)
Supplement: NIHMS549896-supplement-2.pdf [file NIHMS549896-supplement-2.pdf]

| Shared genes (11844 genes)       | Culture only genes (4619 genes) | Tissue only genes (293 genes) |
|----------------------------------|---------------------------------|-------------------------------|
| 1-Mar                            | 3-Mar                           | AK015384                      |
| 4-Mar                            | 0610010B08Rik:Gm14308           | 1700013H16Rik                 |
| 5-Mar                            | 0610040J01Rik                   | 1700019L03Rik                 |
| 6-Mar                            | 1110002L01Rik                   | 1700069L16Rik                 |
| 7-Mar                            | 1110006O24Rik                   | 1700125D06Rik                 |
| 8-Mar                            | 1110018J18Rik                   | 2310010M20Rik                 |
| 9-Mar                            | 1110020A21Rik                   | 2310042D19Rik                 |
| 11-Mar                           | 1110032A04Rik                   | 2310042E22Rik                 |
| 2-Sep                            | 1190003J15Rik                   | 2810405F15Rik                 |
| 3-Sep                            | 1190007F08Rik                   | 4921517L17Rik                 |
| 4-Sep                            | 1500015O10Rik                   | 4930470P17Rik                 |
| 6-Sep                            | 1500017E21Rik                   | 4933416I08Rik                 |
| 8-Sep                            | 1600014C23Rik                   | 6530411M01Rik                 |
| 9-Sep                            | 1600027N09Rik                   | 9030612E09Rik                 |
| 10-Sep                           | 1700003F12Rik                   | 9930012K11Rik                 |
| 11-Sep                           | 1700007B14Rik                   | A430078G23Rik                 |
| 15-Sep                           | 1700007G11Rik                   | Acaa1b                        |
| 0610007L01Rik                    | 1700008F21Rik                   | Acat3                         |
| 0610007P14Rik                    | 1700008I05Rik                   | Accn4                         |
| 0610007P22Rik                    | 1700009P17Rik                   | Acr                           |
| 0610009B22Rik                    | 1700010H22Rik                   | Adam32                        |
| 0610009D07Rik                    | 1700015F17Rik                   | Adora2a                       |
| 0610009O20Rik                    | 1700016H13Rik                   | Adprhl1                       |
| 0610010F05Rik:Kiaa1841:mKIAA1841 | 1700017B05Rik                   | AK002708                      |
| 0610010K06Rik:Brox               | 1700017D01Rik                   | AK006725                      |
| 0610010K14Rik                    | 1700018A04Rik:AK142058          | AK006895                      |
| 0610010O12Rik                    | 1700018L02Rik                   | AK007162                      |
| 0610011F06Rik                    | 1700019E19Rik                   | AK010897                      |
| 0610011L14Rik                    | 1700019G17Rik                   | AK014683                      |
| 0610012G03Rik                    | 1700020A23Rik                   | AK014951                      |
| 0610030E20Rik                    | 1700020D05Rik                   | AK015404                      |
| 0610031J06Rik                    | 1700021K19Rik                   | AK015610                      |
| 0610037L13Rik                    | 1700024P16Rik                   | AK016007                      |
| 0610037P05Rik                    | 1700026D08Rik                   | AK017368                      |
| 0610040B10Rik                    | 1700026L06Rik                   | AK017891                      |
| 0910001L09Rik                    | 1700027A23Rik                   | AK029638                      |
| 1110001A16Rik                    | 1700028J19Rik                   | AK029834                      |

|                         |                                 |                        |
|-------------------------|---------------------------------|------------------------|
| 1110001J03Rik           | 1700029G01Rik                   | AK033061:AK080657      |
| 1110002B05Rik:Mir1892   | 1700029J11Rik                   | AK037113:9530082P21Rik |
| 1110002N22Rik           | 1700030J22Rik                   | AK038985               |
| 1110003E01Rik           | 1700034H14Rik                   | AK042610               |
| 1110004E09Rik           | 1700048O20Rik                   | AK042944               |
| 1110004F10Rik           | 1700054K19Rik                   | AK043659               |
| 1110005A03Rik           | 1700056E22Rik                   | AK043690               |
| 1110007C09Rik           | 1700057G04Rik                   | AK044480               |
| 1110008F13Rik           | 1700060C20Rik                   | AK049102               |
| 1110008J03Rik           | 1700065D16Rik:AK006889          | AK050017               |
| 1110008L16Rik           | 1700066B19Rik                   | AK051019               |
| 1110008P14Rik           | 1700066O22Rik:AK006909:AK016016 | AK076253               |
| 1110012J17Rik           | 1700084C01Rik                   | AK076715               |
| 1110012L19Rik           | 1700084E18Rik                   | AK082862               |
| 1110014N23Rik:Ffr       | 1700086O06Rik                   | AK083149               |
| 1110018G07Rik:mKIAA0317 | 1700086O06Rik                   | AK085625               |
| 1110020G09Rik           | 1700088E04Rik                   | AK086793               |
| 1110021J02Rik           | 1700093K21Rik                   | AK131739               |
| 1110021L09Rik           | 1700094C09Rik                   | AK131821               |
| 1110028C15Rik           | 1700096J18Rik                   | AK132898               |
| 1110031I02Rik           | 1700096K18Rik                   | AK135894               |
| 1110032A03Rik           | 1700108F19Rik                   | AK136034               |
| 1110032F04Rik           | 1700108M19Rik                   | AK137190               |
| 1110034A24Rik           | 1700109G14Rik                   | AK138592               |
| 1110034B05Rik           | 1700112E06Rik                   | AK139359               |
| 1110034G24Rik           | 1700113I22Rik                   | AK139528               |
| 1110037F02Rik           | 1700123K08Rik                   | AK143784               |
| 1110038B12Rik           | 1700125H20Rik                   | AK143982:AK162906      |
| 1110038D17Rik           | 1810011O10Rik                   | AK144055               |
| 1110038F14Rik           | 1810014B01Rik                   | AK144747               |
| 1110049F12Rik           | 1810033B17Rik                   | AK153014               |
| 1110051M20Rik           | 1810062O18Rik                   | AK160416               |
| 1110054O05Rik           | 2010000I03Rik                   | AK164331               |
| 1110057K04Rik           | 2010001M06Rik                   | AK165338               |
| 1110058L19Rik           | 2010001M09Rik                   | AK192827               |
| 1110059E24Rik           | 2010002M12Rik                   | AK195979               |
| 1110059G10Rik:mKIAA1143 | 2010107G12Rik                   | AK217986               |
| 1110065P20Rik           | 2010109I03Rik                   | Akr1b3                 |
| 1110067D22Rik           | 2200002D01Rik                   | Alas2                  |
| 1190002H23Rik           | 2310001K24Rik                   | Aldh3a1                |

|                        |                                 |                                 |
|------------------------|---------------------------------|---------------------------------|
| 1190002N15Rik          | 2310005G13Rik                   | Alox8                           |
| 1190005I06Rik          | 2310014L17Rik                   | Ankrd7                          |
| 1190007I07Rik          | 2310015A10Rik                   | Apoa1                           |
| 1200011I18Rik          | 2310057J18Rik                   | Arhgap9                         |
| 1200014J11Rik          | 2310068J16Rik                   | Arhgef15                        |
| 1200016B10Rik          | 2410004P03Rik                   | Atg9b                           |
| 1300001I01Rik          | 2610018G03Rik                   | Atp6v0a4                        |
| 1300010F03Rik          | 2610019F03Rik                   | Atp6v1b1                        |
| 1300014I06Rik          | 2610020H08Rik                   | Atp6v1e2                        |
| 1300018I17Rik          | 2610021K21Rik                   | B3gnt7                          |
| 1300018J18Rik          | 2610203C22Rik                   | Baiap2l2                        |
| 1500001M20Rik          | 2610203C22Rik                   | Baiap3                          |
| 1500002O20Rik          | 2610204G22Rik                   | Barx2                           |
| 1500003O03Rik          | 2610305D13Rik                   | BC049631:AK006943:1700073E17Rik |
| 1500004A13Rik          | 2700046G09Rik                   | BC055402                        |
| 1500009C09Rik          | 2810006K23Rik                   | BC056163                        |
| 1500009L16Rik          | 2810021J22Rik                   | BC075654:AK082954               |
| 1500011H22Rik          | 2810403D21Rik:AK012972:AK155344 | BC089491                        |
| 1500011K16Rik          | 2810429I04Rik                   | BC157982                        |
| 1500012F01Rik          | 2810433D01Rik                   | Bcas1                           |
| 1500015A07Rik          | 2810433K01Rik:Ska1              | Best1                           |
| 1500031L02Rik          | 2810459M11Rik                   | Bfsp1                           |
| 1500032L24Rik          | 2900002K06Rik                   | Bpil1                           |
| 1520402A15Rik          | 2900041M22Rik                   | Bst2                            |
| 1600002H07Rik          | 2900052N01Rik                   | C2cd4d                          |
| 1600002K03Rik          | 2900060B14Rik                   | Cabp7                           |
| 1600012F09Rik          | 2900092C05Rik                   | Car4                            |
| 1600012H06Rik          | 3110001I22Rik                   | Ccdc78                          |
| 1600014C10Rik          | 3110057O12Rik                   | Ccl11                           |
| 1600021P15Rik          | 3110057O12Rik                   | Ccl25                           |
| 1600029O15Rik          | 3830403N18Rik                   | Ccr4                            |
| 1700001K19Rik          | 3830431G21Rik                   | Cd33                            |
| 1700001L05Rik:AK005608 | 3930402G23Rik                   | Cd82                            |
| 1700001L19Rik          | 4632415K11Rik:mKIAA1609         | Cdc42ep5                        |
| 1700003E16Rik          | 4632434I11Rik                   | Cdk3                            |
| 1700003M02Rik          | 4732471J01Rik                   | Cilp2                           |
| 1700007K13Rik          | 4833418N02Rik                   | Cldn1                           |
| 1700008J07Rik          | 4833422C13Rik                   | Cpxm2                           |
| 1700008O03Rik          | 4833423E24Rik                   | D330041H03Rik                   |
| 1700010I14Rik          | 4921504E06Rik                   | DAPK2:Dapk2                     |

|                                  |                        |          |
|----------------------------------|------------------------|----------|
| 1700012A16Rik                    | 4921506M07Rik          | Dcst1    |
| 1700012B15Rik                    | 4921507P07Rik          | Ddx11    |
| 1700012D14Rik:AK031468           | 4921511C04Rik          | Defb14   |
| 1700013F07Rik                    | 4921511H03Rik          | Dennd1c  |
| 1700016K19Rik                    | 4921524L21Rik          | Dhrs11   |
| 1700019D03Rik:AK217058           | 4921530D09Rik:Kiaa1984 | Dkkl1    |
| 1700019N12Rik                    | 4921539E11Rik          | DQ541918 |
| 1700020I14Rik                    | 4922501C03Rik          | DQ556074 |
| 1700021C14Rik                    | 4922501L14Rik          | DQ559678 |
| 1700021F05Rik                    | 4922505G16Rik          | DQ694553 |
| 1700025G04Rik:ENSMUSG0000007354( | 4930404H21Rik          | DQ713846 |
| 1700025K23Rik                    | 4930412C18Rik:AK019984 | DQ714940 |
| 1700028K03Rik:A830010M20Rik      | 4930415F15Rik          | Drd5     |
| 1700028P14Rik                    | 4930415L06Rik          | Dub1     |
| 1700029F09Rik                    | 4930428D18Rik          | Ecel1    |
| 1700029J07Rik                    | 4930428E23Rik          | Efcab6   |
| 1700030C10Rik                    | 4930430D24Rik          | Egfl6    |
| 1700030K09Rik                    | 4930431A04Rik:Klrb6    | Ehhadh   |
| 1700034H15Rik                    | 4930432E11Rik          | Elmo3    |
| 1700037C18Rik                    | 4930432K21Rik          | Epn3     |
| 1700037H04Rik                    | 4930433N12Rik          | Exoc3l   |
| 1700040I03Rik                    | 4930458L03Rik          | F12      |
| 1700049G17Rik                    | 4930465K10Rik          | F2rl2    |
| 1700052K11Rik                    | 4930469G21Rik          | Faim3    |
| 1700052N19Rik                    | 4930474M22Rik          | Fam166a  |
| 1700054N08Rik                    | 4930481A15Rik          | Fam187a  |
| 1700066M21Rik                    | 4930483J18Rik          | Fbp1     |
| 1700081L11Rik:mKIAA1267          | 4930485B16Rik          | Fermt3   |
| 1700086L19Rik                    | 4930486L24Rik          | Fgd1     |
| 1700094D03Rik                    | 4930503E24Rik          | Foxc2    |
| 1700102P08Rik                    | 4930503L19Rik          | Fxyd3    |
| 1700106N22Rik                    | 4930505A04Rik          | Gas2l2   |
| 1700109H08Rik                    | 4930511M11Rik          | Gdf5     |
| 1700123O20Rik                    | 4930512M02Rik          | Gipr     |
| 1810006K21Rik                    | 4930513N10Rik          | Gja4     |
| 1810008A18Rik                    | 4930515G01Rik          | Gjb3     |
| 1810009A15Rik                    | 4930519F16Rik          | Glipr1l1 |
| 1810010H24Rik                    | 4930522H14Rik          | Gm1070   |
| 1810012P15Rik                    | 4930523C07Rik          | Gm10909  |
| 1810013D10Rik                    | 4930524B15Rik          | Gm11127  |

|                       |                            |                           |
|-----------------------|----------------------------|---------------------------|
| 1810013L24Rik         | 4930525F21Rik              | Gm1337                    |
| 1810014F10Rik:LE51    | 4930526I15Rik              | Gm14378                   |
| 1810020D17Rik         | 4930528A17Rik              | Gm15456:AK049041          |
| 1810022K09Rik         | 4930529M08Rik:RP23-125A1.2 | Gm2506                    |
| 1810024B03Rik         | 4930534B04Rik              | Gm2897:ENSMUSG00000068790 |
| 1810026J23Rik         | 4930538K18Rik              | Gm3428                    |
| 1810027O10Rik         | 4930539E08Rik              | Gm4535                    |
| 1810029B16Rik         | 4930539J05Rik              | Gm5887                    |
| 1810030N24Rik         | 4930550C14Rik              | Gm6623                    |
| 1810030O07Rik         | 4930564B18Rik              | Gm684                     |
| 1810031K17Rik         | 4930567H12Rik              | Gm7609                    |
| 1810032O08Rik:Snord1a | 4930572J05Rik              | Gm962                     |
| 1810037I17Rik         | 4930579C15Rik              | Gpr101                    |
| 1810041L15Rik         | 4930579G24Rik              | Gpr112                    |
| 1810043G02Rik         | 4930579J09Rik              | Gpr113                    |
| 1810043H04Rik         | 4930581F22Rik              | Gpr160                    |
| 1810046J19Rik         | 4930588N13Rik              | Gpr17                     |
| 1810048J11Rik         | 4930590J08Rik              | Gpr21                     |
| 1810049H13Rik         | 4931406B18Rik              | H2-gs10:H2-Gs10           |
| 1810055G02Rik         | 4931408A02Rik:C21orf63     | Hba-a2                    |
| 1810058I24Rik         | 4931429L15Rik              | Hbb-b1                    |
| 1810063B05Rik         | 4932411E22Rik              | Hbq1b                     |
| 1810063B07Rik         | 4932411G14Rik              | Hcn4                      |
| 2-Mar:AK036614        | 4932412H11Rik              | Hhip1                     |
| 2010002N04Rik         | 4932425I24Rik:Aat1         | Hif3a                     |
| 2010007H12Rik         | 4932441B19Rik              | Hist2h4                   |
| 2010011I20Rik         | 4932441J04Rik              | Hkdc1                     |
| 2010012O05Rik         | 4932443I19Rik              | Hnrnpa1                   |
| 2010015L04Rik         | 4933400A11Rik              | Hr                        |
| 2010106G01Rik         | 4933400F21Rik              | Hs6st3                    |
| 2010107E04Rik         | 4933402J07Rik              | Hsd3b6                    |
| 2010107G23Rik         | 4933404M02Rik              | Hspg2                     |
| 2010107H07Rik         | 4933404O12Rik              | Htr5b                     |
| 2010109K11Rik         | 4933406I18Rik              | Ifi27I2b                  |
| 2010111I01Rik:apo     | 4933407L21Rik              | Itga11                    |
| 2010300C02Rik         | 4933415F23Rik              | Itga3                     |
| 2010305A19Rik         | 4933416C03Rik              | Kbtbd10                   |
| 2010315B03Rik         | 4933425L06Rik              | Kcnh4                     |
| 2010320M18Rik         | 4933426I21Rik              | Kcnj14                    |
| 2010321M09Rik         | 4933432I09Rik              | Klhl3                     |

|                        |                        |                    |
|------------------------|------------------------|--------------------|
| 2200002K05Rik          | 4933434I20Rik          | Krt20              |
| 2210009G21Rik          | 4933436C20Rik          | Krt73              |
| 2210012G02Rik          | 4933437F05Rik          | Layn               |
| 2210013O21Rik          | 5031410I06Rik          | Ldoc1              |
| 2210015D19Rik          | 5031414D18Rik          | Lefty1             |
| 2210016F16Rik          | 5031434O11Rik          | Lefty2             |
| 2210016L21Rik          | 5033406O09Rik          | Lhfp15             |
| 2210018M11Rik:AK009395 | 5330413P13Rik          | Mageb16            |
| 2210021J22Rik          | 5330439B14Rik          | Mamstr             |
| 2210403K04Rik:Mir22    | 5430402O13Rik          | Masp2              |
| 2210408I21Rik          | 5430405H02Rik          | Mbd3I2             |
| 2210411K11Rik          | 5430407P10Rik          | Mesp2              |
| 2300009A05Rik          | 5430416O09Rik          | Mfap4              |
| 2310001A20Rik:APMAP    | 5730422E09Rik          | Mir3091            |
| 2310003C23Rik          | 5730590G19Rik          | Mir697             |
| 2310003F16Rik          | 5830403L16Rik:AK044033 | mKIAA0077          |
| 2310003H01Rik:Faap100  | 5830405N20Rik          | Mpst               |
| 2310003L22Rik          | 5830415F09Rik          | Myl3               |
| 2310004I24Rik          | 5830432E09Rik          | Mylpf              |
| 2310004N24Rik          | 5930403L14Rik          | Ndufa4I2           |
| 2310008H09Rik          | 5930412G12Rik          | Ngb                |
| 2310009B15Rik          | 6030446N20Rik          | Nkpd1              |
| 2310011J03Rik          | 6030468B19Rik          | Nlrp12             |
| 2310014H01Rik          | 6330406I15Rik          | Npb                |
| 2310016C08Rik          | 6330407A03Rik          | Npy6r              |
| 2310016M24Rik          | 6330408A02Rik:AK132923 | Nxph3              |
| 2310021P13Rik:Kiaa0913 | 6330416G13Rik:AK203717 | Odf3I2             |
| 2310022A10Rik          | 6330545A04Rik          | Ooep               |
| 2310022B05Rik          | 6430550D23Rik          | OTTMUSG00000013918 |
| 2310028H24Rik          | 6720489N17Rik          | P2rx2              |
| 2310028O11Rik          | 8430406I07Rik          | Peli3              |
| 2310030G06Rik          | 8430431K14Rik          | Pgbd1              |
| 2310030N02Rik          | 9030224M15Rik          | Pi16               |
| 2310033P09Rik          | 9030617O03Rik          | Piwil1             |
| 2310035C23Rik          | 9030619P08Rik          | Plcg2              |
| 2310035K24Rik          | 9130014G24Rik          | Pou5f2             |
| 2310036O22Rik          | 9130017N09Rik          | Prl7a2             |
| 2310037I24Rik          | 9130019O22Rik          | Psd4               |
| 2310039D24Rik          | 9130023H24Rik          | Ptger2             |
| 2310039H08Rik          | 9130206I24Rik          | Pygm               |

|                             |                        |                                      |
|-----------------------------|------------------------|--------------------------------------|
| 2310044H10Rik               | 9230105E10Rik          | Rarg                                 |
| 2310045N01Rik               | 9230116N13Rik          | Rasd1                                |
| 2310046A06Rik               | 9330020H09Rik          | Rassf7                               |
| 2310046O06Rik               | 9330101J02Rik:AK029726 | Rec8                                 |
| 2310047B19Rik               | 9330158H04Rik          | Recql4                               |
| 2310047M10Rik               | 9330158H04Rik:AK165789 | Rgs1:AK029630                        |
| 2310057J16Rik               | 9330171B17Rik          | Rhcg                                 |
| 2310057M21Rik               | 9430041J12Rik          | Rph3al                               |
| 2310061C15Rik               | 9430070O13Rik          | Rptn                                 |
| 2310061I04Rik:RP24-180B11.5 | 9430076C15Rik:Creb5    | Rtn4rl2                              |
| 2310061J03Rik               | 9530026P05Rik          | S1pr5                                |
| 2310067B10Rik               | 9530036O11Rik          | Slc10a4                              |
| 2310079F23Rik               | 9530053A07Rik          | Slc15a1                              |
| 2400001E08Rik               | 9530091C08Rik          | Slc26a2                              |
| 2400003C14Rik               | 9630013A20Rik          | Slc27a3                              |
| 2410001C21Rik               | 9630014M24Rik          | Slc2a9                               |
| 2410002F23Rik:Snord88a      | 9630028B13Rik          | Slc9a2                               |
| 2410002I01Rik               | 9930022D16Rik          | Smr3a                                |
| 2410002O22Rik               | 9930032O22Rik          | Snora41                              |
| 2410002O22Rik               | A130040M12Rik          | Snora69                              |
| 2410003K15Rik               | A130049A11Rik          | Snora78                              |
| 2410004B18Rik               | A230072C01Rik          | Snord42a                             |
| 2410006H16Rik:Snord65       | A230072E10Rik          | Snord87                              |
| 2410015M20Rik:sr104         | A230083G16Rik          | Sstr4                                |
| 2410016O06Rik               | A330021E22Rik          | Susd3                                |
| 2410018L13Rik               | A330035P11Rik:AK049508 | Syce1l                               |
| 2410022L05Rik               | A330049M08Rik          | Tbc1d10c                             |
| 2410022M11Rik               | A330050F15Rik          | OS1A2Dbeta1Jbeta2.1:TCR-beta chain:A |
| 2410042D21Rik               | A330070K13Rik          | Tcte2                                |
| 2410066E13Rik               | A430093F15Rik          | Tepp                                 |
| 2410075B13Rik               | A430105I19Rik          | Tjp3                                 |
| 2410089E03Rik               | A430107O13Rik          | Tm4sf5                               |
| 2410091C18Rik               | A430110N23Rik          | Tmem171                              |
| 2410127L17Rik               | A4gnt                  | Tmem215                              |
| 2410131K14Rik               | A530053G22Rik          | Tmem28                               |
| 2410137F16Rik               | A530064D06Rik          | Tnfrsf4                              |
| 2500003M10Rik:Fop           | A530088E08Rik          | Tnfsf9                               |
| 2510002D24Rik               | A530098C11Rik          | Tnxb                                 |
| 2510003E04Rik:Kbp           | A630001G21Rik          | Tpcn2                                |
| 2510006D16Rik               | A630005I04Rik          | Trp63                                |

|                             |                 |         |
|-----------------------------|-----------------|---------|
| 2510009E07Rik               | A630007B06Rik   | Tspan1  |
| 2510012J08Rik               | A630033H20Rik   | Tstd1   |
| 2510039O18Rik               | A630052C17Rik   | Ubxn11  |
| 2610001J05Rik               | A630055G03Rik   | Uckl1os |
| 2610002J02Rik               | A630066F11Rik   | Usf1    |
| 2610002M06Rik               | A730008H23Rik   | Vmn2r1  |
| 2610008E11Rik               | A730020M07Rik   | Wfdc15b |
| 2610015P09Rik               | A730037C10Rik   | Wnt11   |
| 2610017I09Rik               | A830007P12Rik   | Xdh     |
| 2610024G14Rik               | A830019P07Rik   | Xrra1   |
| 2610027L16Rik               | A830093I24Rik   | Yipf7   |
| 2610029G23Rik               | A930001N09Rik   | Zeb2    |
| 2610029I01Rik               | A930007I19Rik   | Zfp457  |
| 2610034B18Rik               | A930012L18Rik   | Zmynd10 |
| 2610035D17Rik               | A930013B10Rik   | Zmynd15 |
| 2610039C10Rik               | A930038C07Rik   | Zp2     |
| 2610042L04Rik               | AA387883        |         |
| 2610044O15Rik               | AA415398        |         |
| 2610100L16Rik               | AA467197:Mir147 |         |
| 2610101N10Rik               | AA474331        |         |
| 2610109H07Rik               | AA545190        |         |
| 2610203C20Rik               | AA792892        |         |
| 2610301B20Rik               | AA986860        |         |
| 2610301G19Rik               | Aadacl2         |         |
| 2610306M01Rik               | Aadacl3         |         |
| 2610318N02Rik               | Aass            |         |
| 2610507B11Rik               | AB056442        |         |
| 2610524H06Rik               | AB341654        |         |
| 2610524H06Rik:1500011B03Rik | Abca12          |         |
| 2610528E23Rik               | Abca13          |         |
| 2700007P21Rik               | Abca14          |         |
| 2700023E23Rik:Snora26       | Abca15          |         |
| 2700029M09Rik               | Abca16          |         |
| 2700049A03Rik               | Abca17          |         |
| 2700050L05Rik               | Abca4:ABCR      |         |
| 2700060E02Rik               | Abca9           |         |
| 2700062C07Rik               | Abcb1a          |         |
| 2700078E11Rik               | Abcb4           |         |
| 2700078K21Rik:AK037090:Mmh  | Abcb5           |         |
| 2700081O15Rik               | Abcc4           |         |



|                             |                                               |
|-----------------------------|-----------------------------------------------|
| 2700089E24Rik               | Abcc9                                         |
| 2700094K13Rik               | Abcg3                                         |
| 2700097O09Rik               | Abhd4                                         |
| 2700099C18Rik               | Abhd5                                         |
| 2810001G20Rik               | 975:V00821:M13680:M12570:V00757:M36767:X73024 |
| 2810002D19Rik               | abParts:AK156292                              |
| 2810002N01Rik               | abParts:M34473:AK036494                       |
| 2810004N23Rik               | Abpz                                          |
| 2810008D09Rik               | Abtb2                                         |
| 2810008M24Rik               | Acad10:9330129D05Rik                          |
| 2810021B07Rik               | Acan                                          |
| 2810025M15Rik               | Acbd7                                         |
| 2810026P18Rik               | Accn5                                         |
| 2810030E01Rik               | Acn9                                          |
| 2810032G03Rik               | Acnat1                                        |
| 2810046L04Rik               | Acot11                                        |
| 2810055F11Rik               | Acot12                                        |
| 2810405K02Rik               | Acot3                                         |
| 2810407C02Rik               | Acot4                                         |
| 2810408A11Rik               | Acox2                                         |
| 2810408M09Rik               | Acox1                                         |
| 2810410L24Rik               | Acpt                                          |
| 2810417H13Rik               | Acsf2                                         |
| 2810422J05Rik               | Actg2                                         |
| 2810422O20Rik               | Actl6a                                        |
| 2810428I15Rik               | Acvrl1                                        |
| 2810432D09Rik               | Adam1a                                        |
| 2810432L12Rik               | Adam1b                                        |
| 2810453I06Rik               | Adam2                                         |
| 2810454H06Rik               | Adam21                                        |
| 2810474O19Rik               | Adam25                                        |
| 2900005J15Rik               | Adam28                                        |
| 2900006K08Rik               | Adam29                                        |
| 2900010J23Rik:Swi5          | Adam4                                         |
| 2900010M23Rik               | Adam7                                         |
| 2900011O08Rik               | Adamts12                                      |
| 2900026A02Rik               | Adamts14                                      |
| 2900053A13Rik               | Adamts15                                      |
| 2900062L11Rik               | Adamts16:AK134523:mKIAA2029                   |
| 2900062L11Rik:6530401D17Rik | Adamts19                                      |

|                        |                            |
|------------------------|----------------------------|
| 2900064A13Rik:ORF3     | Adamts6                    |
| 2900073G15Rik          | Adamtsl3                   |
| 2900079G21Rik          | Adamtsl4                   |
| 2900092D14Rik          | Adamtsl5                   |
| 2900092E17Rik          | Adat2                      |
| 2900097C17Rik          | Adat3                      |
| 3-Apr:0610007C21Rik    | Adcy10                     |
| 3000002C10Rik          | Adora2b                    |
| 3010026O09Rik          | Adora3                     |
| 3110001D03Rik          | Adra1a                     |
| 3110002H16Rik          | Adra2b                     |
| 3110003A17Rik          | Adrb2                      |
| 3110009E18Rik          | Adrb3                      |
| 3110021A11Rik          | Aebp1                      |
| 3110035E14Rik          | AF251705:MAIR-IIa          |
| 3110039M20Rik          | AF357355                   |
| 3110040N11Rik          | AF529169                   |
| 3110043O21Rik          | Afap1l2:mKIAA1914:AK158196 |
| 3110047P20Rik          | Aff2                       |
| 3110052M02Rik          | Afp                        |
| 3110062M04Rik          | Agbl1                      |
| 3110070M22Rik          | Agbl2                      |
| 3110082D06Rik          | Agpat9                     |
| 3110082I17Rik          | Agphd1:C630028N24Rik       |
| 3200002M19Rik          | Agr3                       |
| 3230401D17Rik          | Agtr1b                     |
| 3300002I08Rik:ZIPO-III | Agtr2                      |
| 3632451O06Rik:AK087604 | Agxt2l1                    |
| 3830406C13Rik          | Ahnak                      |
| 3830408C21Rik          | Ahnak2                     |
| 4430402I18Rik          | AI118078                   |
| 4632415L05Rik          | AI314831                   |
| 4632419I22Rik          | AI317395                   |
| 4632428N05Rik          | AI428936                   |
| 4731419I09Rik          | AI464131                   |
| 4732415M23Rik          | AI467606                   |
| 4732418C07Rik          | AI506816                   |
| 4732471D19Rik          | AI606181                   |
| 4831440E17Rik          | AI607873                   |
| 4832428D23Rik          | AI607873                   |

|                          |                                    |
|--------------------------|------------------------------------|
| 4833420G17Rik            | Aif1                               |
| 4833424O15Rik            | Aif1l                              |
| 4833439L19Rik            | Aifm2                              |
| 4833442J19Rik            | Aim1l                              |
| 4921513D23Rik:Lkap       | Aim2                               |
| 4921515J06Rik            | Aipl1                              |
| 4921524J17Rik            | AK002723                           |
| 4921531C22Rik            | AK002805                           |
| 4930402H24Rik            | AK002838                           |
| 4930403N07Rik            | AK002866                           |
| 4930412F15Rik            | AK003812:AK143417                  |
| 4930417G10Rik            | AK004585                           |
| 4930420K17Rik:AK160408   | AK005115                           |
| 4930422G04Rik            | AK005306                           |
| 4930427A07Rik            | AK005576                           |
| 4930429B21Rik            | AK005589:AK133007                  |
| 4930430F08Rik            | AK005649                           |
| 4930441O14Rik            | AK005653                           |
| 4930444A02Rik            | AK005667                           |
| 4930447C04Rik:Six6os1    | AK005686                           |
| 4930452B06Rik            | AK005707                           |
| 4930453N24Rik            | K005793:AK016150:AK030258:AK047938 |
| 4930455C21Rik            | AK005828                           |
| 4930455F23Rik            | AK005895                           |
| 4930471M23Rik            | AK005912                           |
| 4930473A06Rik:AK029637   | AK005951                           |
| 4930506M07Rik            | AK005956                           |
| 4930507D05Rik            | AK006001                           |
| 4930512B01Rik            | AK006037                           |
| 4930519G04Rik            | AK006039                           |
| 4930546H06Rik:Ncrna00085 | AK006045                           |
| 4930547N16Rik            | AK006051                           |
| 4930563E22Rik:AK043242   | AK006167                           |
| 4930578N16Rik            | AK006293                           |
| 4930579G22Rik            | AK006321                           |
| 4931406C07Rik            | AK006389                           |
| 4931406P16Rik            | AK006426                           |
| 4931414P19Rik            | AK006454                           |
| 4931417G12Rik            | AK006461                           |
| 4931428F04Rik            | AK006531                           |

|                                  |                   |
|----------------------------------|-------------------|
| 4931429I11Rik                    | AK006576          |
| 4931440F15Rik                    | AK006587          |
| 4931440P22Rik:AK161073           | AK006637          |
| 4932415G12Rik                    | AK006644          |
| 4932416H05Rik                    | AK006651          |
| 4932435O22Rik                    | AK006659          |
| 4932438A13Rik:Kiaa1109:mKIAA1109 | AK006884          |
| 4932438H23Rik                    | AK006894          |
| 4933403F05Rik                    | AK006896          |
| 4933403G14Rik                    | AK007154          |
| 4933407C03Rik                    | AK007174          |
| 4933407H18Rik                    | AK007210          |
| 4933407K13Rik                    | AK007274          |
| 4933411K20Rik                    | AK007305          |
| 4933421E11Rik                    | AK007349          |
| 4933421O10Rik                    | AK007436          |
| 4933424B01Rik                    | AK007571          |
| 4933426M11Rik                    | AK007770          |
| 4933427D14Rik:Kiaa0753:mKIAA0753 | AK007819          |
| 4933427G17Rik                    | AK007836          |
| 4933430H15Rik                    | AK007998          |
| 4933431E20Rik                    | AK008166          |
| 4933432B09Rik                    | AK008384:AK029153 |
| 4933433P14Rik                    | AK008545          |
| 4933434E20Rik                    | AK008705          |
| 4933439C10Rik                    | AK008921          |
| 4933439F18Rik                    | AK008969          |
| 5-Sep:Cdcrel-1                   | AK009335          |
| 5031426D15Rik                    | AK009724          |
| 5031439G07Rik                    | AK009813          |
| 5033411D12Rik                    | AK009869          |
| 5033414D02Rik                    | AK009977          |
| 5133401N09Rik                    | AK010390          |
| 5330417C22Rik                    | AK011479          |
| 5330426P16Rik                    | AK011482          |
| 5330429B09Rik                    | AK011498          |
| 5330429B09Rik                    | AK011684          |
| 5330434G04Rik                    | AK011913          |
| 5330437I02Rik                    | AK012035          |
| 5430405G05Rik                    | AK012238          |

|                         |                   |
|-------------------------|-------------------|
| 5430411K18Rik:mKIAA1632 | AK012325          |
| 5430416N02Rik           | AK012387          |
| 5430417L22Rik           | AK012506          |
| 5430437P03Rik           | AK012547          |
| 5530601H04Rik           | AK013668          |
| 5730403B10Rik:AK153988  | AK013876          |
| 5730409E04Rik           | AK014273          |
| 5730437N04Rik           | AK014435          |
| 5730455O13Rik           | AK014660          |
| 5730455P16Rik           | AK014726          |
| 5730469M10Rik           | AK014786          |
| 5730494M16Rik           | AK014798          |
| 5730494N06Rik           | AK014857          |
| 5730508B09Rik           | AK014964          |
| 5730522E02Rik           | AK014986          |
| 5730528L13Rik           | AK015004:AK014224 |
| 5730577I03Rik           | AK015092          |
| 5830416P10Rik:AK019949  | AK015191          |
| 5830418K08Rik:mKIAA1731 | AK015200          |
| 5830427D03Rik           | AK015219          |
| 5830433M19Rik           | AK015279          |
| 5930416I19Rik           | AK015341          |
| 5930434B04Rik           | AK015360          |
| 6030405A18Rik           | AK015413          |
| 6030419C18Rik           | AK015470:AK030052 |
| 6030422M02Rik           | AK015492          |
| 6030458C11Rik           | AK015712          |
| 6230409E13Rik           | AK015714          |
| 6230427J02Rik           | AK015773          |
| 6330403A02Rik           | AK015900          |
| 6330403K07Rik           | AK015944          |
| 6330407J23Rik           | AK015958          |
| 6330409N04Rik           | AK015969:AK006022 |
| 6330439K17Rik           | AK016032          |
| 6330503K22Rik:Cep110    | AK016097          |
| 6330512M04Rik           | AK016128          |
| 6330527O06Rik           | AK016179          |
| 6330549D23Rik           | AK016284          |
| 6330577E15Rik           | AK016335          |
| 6330578E17Rik           | AK016361          |

|                             |                   |
|-----------------------------|-------------------|
| 6430527G18Rik               | AK016377          |
| 6430548M08Rik               | AK016383          |
| 6430571L13Rik               | AK016388          |
| 6430598A04Rik               | AK016417          |
| 6430704M03Rik               | AK016521          |
| 6530401N04Rik               | AK016650          |
| 6530418L21Rik               | AK016752          |
| 6720401G13Rik               | AK016841          |
| 6720456B07Rik               | AK016926          |
| 6720463M24Rik               | AK017010:AK135599 |
| 6720489N17Rik:Zfp934        | AK017025:AK005578 |
| 6820408C15Rik               | AK017040          |
| 6820431F20Rik               | AK017092          |
| 6820431F20Rik               | AK017177          |
| 7-Sep:mKIAA4020             | AK017239          |
| 8030462N17Rik               | AK017306          |
| 8430410A17Rik               | AK017349          |
| 8430410K20Rik               | AK017404:BC023070 |
| 8430419L09Rik               | AK017500          |
| 8430427H17Rik               | AK017534          |
| 8430429K09Rik:AK018450      | AK017706          |
| 9030025P20Rik:2210404J11Rik | AK017883          |
| 9030409G11Rik:mKIAA1026     | AK017893          |
| 9030418K01Rik               | AK018214          |
| 9030425E11Rik               | AK018624          |
| 9030624J02Rik               | AK018772          |
| 9030625A04Rik               | AK018918          |
| 9130011E15Rik               | AK018929          |
| 9130011J15Rik               | AK018990:AK015782 |
| 9130024F11Rik               | AK018996          |
| 9130221H12Rik               | AK019031          |
| 9130401M01Rik               | AK019067          |
| 9230110C19Rik               | AK019366          |
| 9230114K14Rik               | AK019375          |
| 9330129D05Rik               | AK019593          |
| 9330133O14Rik               | AK019604          |
| 9330151L19Rik               | AK019614          |
| 9330159F19Rik               | AK019628          |
| 9330176C04Rik               | AK019630:AK019722 |
| 9330182L06Rik               | AK019672:AK015937 |

|                               |                            |
|-------------------------------|----------------------------|
| 9430008C03Rik                 | AK019679                   |
| 9430015G10Rik                 | AK019690                   |
| 9430016H08Rik                 | AK019691                   |
| 9430020K01Rik                 | AK019737                   |
| 9430021M05Rik                 | AK019743                   |
| 9430023L20Rik                 | AK019772                   |
| 9430031J16Rik                 | AK019785                   |
| 9430038I01Rik                 | AK019838                   |
| 9430060I03Rik                 | AK020101                   |
| 9430083A17Rik                 | AK020205:AK038610:AK033210 |
| 9530009M10Rik                 | AK020351                   |
| 9530059O14Rik                 | AK020406                   |
| 9530068E07Rik                 | AK020496                   |
| 9530077C05Rik:mKIAA0895       | AK020506                   |
| 9630033F20Rik                 | AK020549                   |
| 9830001H06Rik                 | AK020619                   |
| 9930014A18Rik                 | AK020680                   |
| 9930021J03Rik                 | AK020722                   |
| 9930104L06Rik                 | AK020764                   |
| A030009H04Rik                 | AK020795                   |
| A130010J15Rik                 | AK020834                   |
| A130022J15Rik                 | AK020898                   |
| A230046K03Rik                 | AK020930                   |
| A230051G13Rik                 | AK021004                   |
| A230056P14Rik                 | AK021007                   |
| A230056P14Rik                 | AK021048:AK043286:AK046742 |
| A230057D06Rik                 | AK021197                   |
| A230073K19Rik                 | AK021262                   |
| A2ld1:a2ld1                   | AK028033                   |
| A2m                           | AK028089                   |
| A330008L17Rik:AK042807        | AK028224                   |
| A330023F24Rik:Mir29b-2:Mir29c | AK028243                   |
| A330040F15Rik                 | AK028422                   |
| A330050B17Rik                 | AK028549                   |
| A330069E16Rik                 | AK029023                   |
| A330076H08Rik:Mir344g         | AK029086                   |
| A430005L14Rik                 | AK029100                   |
| A430033K04Rik                 | AK029443                   |
| A530054K11Rik                 | AK029503                   |
| A530058N18Rik:C130080G10Rik   | AK029598                   |

|                     |                            |
|---------------------|----------------------------|
| A630072M18Rik       | AK029643                   |
| A730008H23Rik:Hjurp | AK029746                   |
| A730011L01Rik       | AK029792                   |
| A730017C20Rik       | AK029958                   |
| A730017L22Rik       | AK030236                   |
| A830010M20Rik       | AK030376:AK036632:AK009064 |
| A830018L16Rik       | AK030770                   |
| A830080D01Rik       | AK031221                   |
| A830082N09Rik       | AK031234                   |
| A930004D18Rik       | AK031463:BC039771          |
| A930005H10Rik       | AK032194                   |
| A930005I04Rik       | AK032662:Specc1            |
| A930011G23Rik       | AK033147:AK003136          |
| A930013F10Rik       | AK033180                   |
| A930015D03Rik       | AK033378                   |
| A930017M01Rik       | AK034149:AK040733          |
| AA388235            | AK034221                   |
| AA408296            | AK034282:AK039372          |
| AA465934            | AK034302:AK162599          |
| AA881470            | AK034488                   |
| AA960436            | AK034766                   |
| AA987161            | AK035006                   |
| Aaas                | AK035229                   |
| Aacs                | AK035387                   |
| Aadat               | AK035406                   |
| Aagab:2310007F21Rik | AK035444                   |
| Aak1                | AK035460                   |
| Aamp                | AK035687                   |
| Aard                | AK035706                   |
| Aars                | AK035761                   |
| Aars2               | AK035785                   |
| Aarsd1              | AK035829                   |
| Aasdh:AASDH         | AK035979                   |
| Aasdhppt            | AK035994                   |
| Aatf                | AK036466                   |
| Aatk                | AK036854                   |
| aatyk3:Lmtk3        | AK036897                   |
| AB341556            | AK036974                   |
| AB346227            | AK037155                   |
| AB349695            | AK037159                   |



|                 |                        |
|-----------------|------------------------|
| AB350566        | AK037830               |
| AB352175        | AK038087               |
| Abat            | AK038444:AK038386      |
| Abca1           | AK038589               |
| Abca2           | AK038598               |
| Abca3           | AK038602               |
| Abca5:abca5     | AK038632               |
| Abca6           | AK038711               |
| Abca7           | AK038749               |
| Abca8a:abca8a   | AK038784               |
| Abca8b          | AK038827               |
| Abcb10          | AK038880               |
| Abcb1b          | AK038886               |
| Abcb6           | AK038933               |
| Abcb7           | AK038992               |
| Abcb8           | AK038993               |
| Abcb9:TAPL      | AK039030               |
| Abcc1           | AK039053               |
| Abcc10          | AK039060               |
| Abcc5           | AK039065               |
| Abcc8           | AK039090               |
| Abcd1           | AK039091               |
| Abcd2           | AK039118               |
| Abcd3           | AK039361               |
| Abcd4           | AK039480               |
| Abce1           | AK039487               |
| Abcf1           | AK039581               |
| Abcf2           | AK039589               |
| Abcf3           | AK039595               |
| Abcg1           | AK039624               |
| Abcg2           | AK039657               |
| Abcg4           | AK039686               |
| Abhd10          | AK039712               |
| Abhd11          | AK039720               |
| Abhd12          | AK039820               |
| Abhd13          | AK039960:4930485B16Rik |
| Abhd14a         | AK040035               |
| Abhd14b         | AK040057               |
| Abhd15:AK040172 | AK040173               |
| Abhd16a         | AK040224               |

|                          |                   |
|--------------------------|-------------------|
| Abhd2                    | AK040320          |
| Abhd3                    | AK040452          |
| Abhd6                    | AK040553          |
| Abhd8                    | AK040640          |
| Abi1                     | AK040752          |
| Abi2                     | AK040808          |
| Abi3bp                   | AK040992          |
| Abl1                     | AK041061          |
| Abl2                     | AK041109          |
| Ablim1:AK165766:AK041356 | AK041287          |
| Ablim2:ABLIM2            | AK041463          |
| Ablim3                   | AK041537          |
| Abr                      | AK041570          |
| Abt1                     | AK041587          |
| Acaa1a                   | AK041762          |
| Acaa2                    | AK041972          |
| Acaca:AK040794           | AK042010          |
| Acad8                    | AK042041          |
| Acad9:AK172713           | AK042124          |
| Acadl                    | AK042300          |
| Acadm                    | AK042445          |
| Acads                    | AK042619          |
| Acadsb                   | AK042843          |
| Acadvl                   | AK042845          |
| Acap2                    | AK042927          |
| Acap3                    | AK042966:Mtag2    |
| Acat1                    | AK042998          |
| Acat2                    | AK043004          |
| Acbd3                    | AK043032          |
| Acbd4                    | AK043153          |
| Acbd5                    | AK043163          |
| Acbd6                    | AK043174          |
| Accn1                    | AK043330          |
| Accn2                    | AK043332          |
| Accs                     | AK043439          |
| Acd                      | AK043502          |
| Ace                      | AK043505:AK083606 |
| Acer2:AK010770           | AK043509:AK045625 |
| Acer3                    | AK043564:AK154552 |
| Ache                     | AK043612          |

|                |                   |
|----------------|-------------------|
| Acin1          | AK043662          |
| Acly           | AK043780          |
| Aco1           | AK043804          |
| Aco2           | AK043904          |
| Acot1          | AK043994:AK020388 |
| Acot10         | AK044106          |
| Acot13         | AK044354          |
| Acot2          | AK044363          |
| Acot5          | AK044380          |
| Acot7          | AK044786          |
| Acot8          | AK044789          |
| Acot9          | AK045137          |
| Acox1          | AK045142          |
| Acox3          | AK045290:AK041042 |
| Acp1           | AK045385          |
| Acp2           | AK045483          |
| Acp6           | AK045519          |
| Acp12          | AK045624:AK030468 |
| Acrbp:Ing4     | AK045688          |
| Acsbg1         | AK045755          |
| Acsf3          | AK045786          |
| Acs1           | AK046172          |
| Acs13          | AK046300          |
| Acsl4:mACS4    | AK046349          |
| Acs15          | AK046388          |
| Acs16          | AK046981          |
| Acsm3          | AK047141          |
| Acss1          | AK047243          |
| Acss2          | AK047520          |
| Acta1          | AK047727          |
| Acta2:AK080187 | AK047988          |
| Actb           | AK048429          |
| Actg1          | AK048775          |
| Act16b         | AK048798          |
| Actn1          | AK048814:AK087338 |
| Actn2          | AK048886          |
| Actn4          | AK049068          |
| Actr10         | AK049168          |
| Actr1b         | AK049793          |
| Actr1b:Actr1a  | AK049838          |

|               |                   |
|---------------|-------------------|
| Actr2         | AK049951          |
| Actr3         | AK049985          |
| Actr3b        | AK050091          |
| Actr5         | AK050217:AK034539 |
| Actr6         | AK050253          |
| Actr8         | AK050283          |
| Acvr1         | AK050360:AK143933 |
| Acvr1b        | AK050464          |
| Acvr1c        | AK050844          |
| Acvr2a        | AK051057          |
| Acvr2b        | AK051417          |
| Acy1          | AK051482          |
| Acyp1         | AK051514          |
| Acyp2         | AK051804          |
| Ada           | AK051847          |
| Adal          | AK052414:Nrg1     |
| Adam10        | AK052572          |
| Adam11        | AK052590          |
| Adam12        | AK052594          |
| Adam15        | AK052788          |
| Adam17        | AK052880          |
| Adam19        | AK052909          |
| Adam22:ADAM22 | AK053084          |
| Adam23        | AK053109          |
| Adam8         | AK053157:BC064451 |
| Adam9         | AK053193          |
| Adamts1       | AK053270          |
| Adamts10      | AK053295:AK045814 |
| Adamts13      | AK053376          |
| Adamts17      | AK053982:AK020517 |
| Adamts18      | AK054420          |
| Adamts2       | AK054493          |
| Adamts20      | AK075572          |
| Adamts3       | AK075658          |
| Adamts5       | AK076313          |
| Adamts8       | AK076318          |
| Adamts9       | AK076344          |
| Adamtsl1      | AK076358          |
| Adamtsl2      | AK076389          |
| Adap1         | AK076555          |

|              |                   |
|--------------|-------------------|
| Adap2        | AK076605          |
| Adar         | AK076622          |
| Adarb1       | AK076658:AK076809 |
| Adarb2:Adar3 | AK076660          |
| Adat1        | AK076672          |
| Adc          | AK076674          |
| Adck1        | AK076709          |
| Adck2        | AK076883:AK006282 |
| Adck3:Cabc1  | AK076935          |
| Adck4        | AK076939          |
| Adck5        | AK076947          |
| Adcy1        | AK076950          |
| Adcy2        | AK076963          |
| Adcy5        | AK076978          |
| Adcy6        | AK076979          |
| Adcy7        | AK076984          |
| Adcy8        | AK076987          |
| Adcy9        | AK077029          |
| Adcyap1      | AK077166          |
| Adcyap1r1    | AK077175          |
| Add1:ADD1    | AK077358          |
| Add2         | AK077427:AK010793 |
| Add3         | AK077481          |
| Adh5         | AK077492          |
| Adhfe1       | AK078255          |
| Adi1         | AK078352          |
| Adipor1      | AK078446          |
| Adipor2      | AK079018          |
| Adk          | AK079222:AK035738 |
| Adnp         | AK079377:AK007907 |
| Adnp2        | AK079660          |
| Ado          | AK079670          |
| Adora1       | AK079699          |
| Adpgk        | AK079709:AK039826 |
| Adprh        | AK079714          |
| Adprh12      | AK079730          |
| Adra1b       | AK079798          |
| Adra1d       | AK079804          |
| Adra2a       | AK079912          |
| Adra2c       | AK079929          |

|                        |                   |
|------------------------|-------------------|
| Adrb1                  | AK079939          |
| Adrbk1                 | AK080009          |
| Adrbk2                 | AK080057          |
| Adrm1                  | AK080063:AK153639 |
| Adsl                   | AK080070          |
| Adss                   | AK080222          |
| Adssl1                 | AK080292          |
| Aebp2                  | AK080352          |
| Aen                    | AK080411:AK044526 |
| Aes                    | AK080597          |
| AF217545               | AK080631          |
| AF357359               | AK080648          |
| Afap1                  | AK080684          |
| Afap1l1                | AK080857          |
| Aff1                   | AK081086          |
| Aff3                   | AK082064          |
| Aff4:BC099959:Alf4     | AK082307          |
| Afg3l1                 | AK082325          |
| Afg3l2                 | AK082693          |
| Aftph                  | AK082693          |
| Aga                    | AK083150          |
| Agap1                  | AK083203          |
| Agap2                  | AK083230          |
| Agap3                  | AK083252          |
| Agbl3                  | AK083547          |
| Agbl5                  | AK084059          |
| Ager:rage              | AK084200:AK014752 |
| Agfg1                  | AK084265          |
| Agfg2                  | AK084432:AK015772 |
| Aggf1                  | AK084486          |
| Agk                    | AK084560          |
| AgI                    | AK084599          |
| Agpat1                 | AK084646          |
| Agpat3                 | AK084809          |
| Agpat4                 | AK084954:AK171817 |
| Agpat5                 | AK085274          |
| Agpat6                 | AK085337          |
| Agps                   | AK085341          |
| Agrn                   | AK085342:AK090187 |
| Agrp:AK086852:AK080383 | AK085371          |

|                    |                   |
|--------------------|-------------------|
| Agtpbp1:Nna1       | AK085384          |
| Agtrap             | AK085438          |
| Agxt2l2            | AK085760          |
| Ahctf1             | AK085761          |
| Ahcy               | AK085768          |
| Ahcyl1             | AK085818          |
| Ahcyl2             | AK085824          |
| Ahdc1              | AK085881          |
| Ahi1:Ahi-1         | AK085905:AK085943 |
| Ahnak2             | AK085942          |
| Ahr                | AK085969          |
| Ahrr               | AK085995          |
| Ahsa1              | AK086087          |
| Ahsa2              | AK086315          |
| AI314180:mKIAA0368 | AK086341          |
| AI314976           | AK086375          |
| AI316807           | AK086420          |
| AI413582           | AK086460          |
| AI414108           | AK086556          |
| AI429214           | AK086911          |
| AI462493           | AK087024          |
| AI480653           | AK087248          |
| AI504432           | AK087340          |
| AI593442           | AK087382          |
| AI597468           | AK087617          |
| AI597479           | AK087755          |
| AI646023           | AK087762          |
| AI836003           | AK087806          |
| AI846148           | AK087850          |
| AI848100           | AK087886          |
| AI854703           | AK088911:AK041706 |
| AI894139:Zfp956    | AK088937          |
| AI987944           | AK089519          |
| Aida               | AK090337:AK148393 |
| Aifm1              | AK131678          |
| Aifm3              | AK131776          |
| Aig1               | AK131781          |
| Aimp1              | AK131895:AK083296 |
| Aimp2              | AK131900          |
| Aip                | AK132076          |

|                            |                                 |
|----------------------------|---------------------------------|
| Airn                       | AK132123                        |
| Ajap1                      | AK132490                        |
| AK002390                   | AK132719                        |
| AK004186                   | AK132720                        |
| AK004252:AK039760          | AK132723                        |
| AK005305:AK004850:AK031500 | AK132743                        |
| AK005363                   | AK132872                        |
| AK005538:AK007255          | AK132885                        |
| AK005967                   | AK132902                        |
| AK006029                   | AK132929                        |
| AK006121                   | AK132955                        |
| AK006593:AK006334          | AK132957                        |
| AK006702                   | AK132982                        |
| AK006958                   | AK133035                        |
| AK008077                   | AK133078                        |
| AK008417                   | AK133139                        |
| AK008665                   | AK133166                        |
| AK008852:AK007191          | AK133167                        |
| AK008857:BC099512:BC021953 | AK133228                        |
| AK008866                   | AK133250                        |
| AK009067                   | AK133303                        |
| AK009351                   | AK133329                        |
| AK009785                   | AK133405                        |
| AK010129                   | AK133438                        |
| AK010403                   | AK133627                        |
| AK010638                   | AK133643:AK021198               |
| AK010870                   | AK134203                        |
| AK010878                   | AK134673                        |
| AK011205                   | AK135004                        |
| AK011444                   | AK135377                        |
| AK011460                   | AK135560                        |
| AK011885                   | AK135671                        |
| AK012595                   | AK135688                        |
| AK012841                   | AK135764                        |
| AK013046                   | AK135852                        |
| AK013372                   | AK135932                        |
| AK013453                   | AK135960                        |
| AK013480                   | AK135963:AK135813               |
| AK013506                   | AK135992:D030018L15Rik:AK137238 |
| AK013593                   | AK136021:AK043303               |



|                            |                   |
|----------------------------|-------------------|
| AK013794                   | AK136619          |
| AK013883                   | AK136654          |
| AK014089                   | AK136722          |
| AK014119                   | AK136742          |
| AK014177:AK014032          | AK136877:AK039634 |
| AK014209:AK148766          | AK137428          |
| AK014378                   | AK137583          |
| AK015392                   | AK138089          |
| AK015544                   | AK138212          |
| AK015545                   | AK138215          |
| AK015562                   | AK138291          |
| AK015813:AK019773          | AK138307          |
| AK016054                   | AK138343:AK161373 |
| AK016085                   | AK138346          |
| AK016265:AK083124:BC048612 | AK138383          |
| AK016307                   | AK138554          |
| AK016486                   | AK138624          |
| AK016511                   | AK138658          |
| AK016591                   | AK139109          |
| AK016682                   | AK139544          |
| AK016808                   | AK139560          |
| AK017143:AK042126:BC050254 | AK139614          |
| AK017243                   | AK139634          |
| AK017924                   | AK139772          |
| AK018074:6230400D17Rik     | AK139806          |
| AK018309                   | AK139864          |
| AK018490:AK034016          | AK139889          |
| AK018753                   | AK140218          |
| AK019082:BC048663          | AK140221          |
| AK019114                   | AK140437          |
| AK019124                   | AK140632          |
| AK019262                   | AK140919          |
| AK019365                   | AK141205          |
| AK019420                   | AK141396          |
| AK019730:AK013680          | AK141411          |
| AK019738                   | AK141527          |
| AK020095                   | AK141659:AK019137 |
| AK020398                   | AK141725          |
| AK020577                   | AK142077          |
| AK020728                   | AK142359          |

|                            |                   |
|----------------------------|-------------------|
| AK021003                   | AK142467:AK045825 |
| AK021280                   | AK142614          |
| AK021325                   | AK142847          |
| AK021368:Mir101a           | AK142879          |
| AK021377:AK020476          | AK142949          |
| AK027957                   | AK142995          |
| AK028782                   | AK143085:AK090209 |
| AK029402                   | AK143102          |
| AK029407                   | AK143195          |
| AK029857:AK030448:AK044020 | AK143234          |
| AK030357                   | AK143260          |
| AK030646                   | AK143856:AK052711 |
| AK030979:6720456H20Rik     | AK143902          |
| AK031816:AK165889:AK141638 | AK143952          |
| AK031861                   | AK143957          |
| AK032343:AK047441          | AK144120          |
| AK032387                   | AK144265          |
| AK033170                   | AK144329          |
| AK033525:AK015096          | AK144330          |
| AK033854                   | AK144367:AK144485 |
| AK034200                   | AK144545          |
| AK034421                   | AK144610          |
| AK034502                   | AK144617          |
| AK034519:AK136882:Mir1895  | AK144771          |
| AK034698                   | AK144859          |
| AK035754                   | AK144870:AK043305 |
| AK035982                   | AK144912          |
| AK036020                   | AK144984:AK087460 |
| AK036048                   | AK145144          |
| AK036329                   | AK145161          |
| AK036371                   | AK145301          |
| AK036616:Snhg1:Snord22     | AK145307          |
| AK036982                   | AK145334          |
| AK037070                   | AK145340          |
| AK037193                   | AK145489          |
| AK037841                   | AK146183          |
| AK038306                   | AK146690          |
| AK038423                   | AK146694          |
| AK038603                   | AK147070          |
| AK038624                   | AK147079:AK015094 |

|                            |                   |
|----------------------------|-------------------|
| AK038627                   | AK148313          |
| AK038791                   | AK148373          |
| AK039117                   | AK149260          |
| AK039132                   | AK149278          |
| AK039268:AK038079          | AK149307          |
| AK039284                   | AK149321          |
| AK039635                   | AK149453          |
| AK039693                   | AK150172          |
| AK039862                   | AK150199          |
| AK039954:BC062820:AK037260 | AK152437          |
| AK040027                   | AK153534          |
| AK040276                   | AK153575          |
| AK040485                   | AK153660          |
| AK040557                   | AK154190          |
| AK040705                   | AK154225          |
| AK041408                   | AK154427          |
| AK041893                   | AK154631:AK171408 |
| AK041998                   | AK155169          |
| AK042223:Jakmip1           | AK155239          |
| AK042904                   | AK157531:AK084744 |
| AK043101                   | AK157795          |
| AK043516                   | AK157916          |
| AK043531                   | AK158148:AK157947 |
| AK043581                   | AK158189          |
| AK043789:AK142999          | AK158291          |
| AK043814                   | AK158295          |
| AK043846                   | AK158434          |
| AK043847                   | AK158482          |
| AK043851                   | AK158810          |
| AK043958                   | AK158926          |
| AK044036                   | AK158973          |
| AK044041                   | AK159003          |
| AK044089                   | AK159035          |
| AK044164:AK080663          | AK159351          |
| AK044374                   | AK160141          |
| AK044378                   | AK160850          |
| AK044410:AK084284          | AK160921          |
| AK044422:Mir3078:Mir124a-1 | AK161361          |
| AK044425                   | AK161362:AK146381 |
| AK044447                   | AK161406          |

|                        |                            |
|------------------------|----------------------------|
| AK044503:AK163447      | AK161589                   |
| AK044689               | AK161599                   |
| AK045038               | AK162138                   |
| AK045371               | AK162144:AK054265          |
| AK045502               | AK162351                   |
| AK045535               | AK162363                   |
| AK045643               | AK162386                   |
| AK045681:AK078363      | AK162496                   |
| AK045807               | AK162519                   |
| AK046130               | AK162666:AK005418          |
| AK046134               | AK162774                   |
| AK046150               | AK162833                   |
| AK046160               | AK163153:AK137341          |
| AK046216               | AK163667:BC048594          |
| AK046304               | AK163681                   |
| AK046316               | AK163711                   |
| AK046351               | AK164315                   |
| AK046385:mKIAA1884     | AK165329                   |
| AK046417               | AK165366                   |
| AK046721               | AK165607                   |
| AK046786               | AK165697                   |
| AK047030               | AK166079                   |
| AK047238               | AK166469:AK040392:AK169482 |
| AK047676               | AK167606:BC064108:AK030886 |
| AK048013               | AK169220                   |
| AK048050               | AK172459                   |
| AK048292               | AK172672                   |
| AK048368:Cdh10         | AK172683:AK041647          |
| AK048595               | AK178082                   |
| AK048710               | AK179786                   |
| AK049017               | AK195428                   |
| AK049668               | AK198984                   |
| AK049852               | AK205147                   |
| AK050069               | AK205379                   |
| AK050336               | AK205379                   |
| AK050586               | AK205379                   |
| AK050795               | AK210533                   |
| AK050866               | AK213636                   |
| AK051166:2810055G20Rik | AK214167:AK021127          |
| AK051383               | AK218396                   |

|                            |                      |
|----------------------------|----------------------|
| AK052293:Tubgcp6           | Ak7                  |
| AK052627                   | Akap14               |
| AK053124:AK018376          | Akna                 |
| AK053296:BC072601:AK132380 | Aknad1               |
| AK054042                   | Akr1b8               |
| AK054076:AK029473          | Akr1c13              |
| AK057615:lp6k2             | Akr1c18              |
| AK076661                   | Akr1c21              |
| AK076706:AK166060:AK144823 | Akr1cl:4921521F21Rik |
| AK076759                   | Aldh16a1:mFLJ00209   |
| AK076914                   | Aldh1a3              |
| AK077350                   | Aldh1a7              |
| AK077428                   | Aldh3b1              |
| AK077474:4930579K19Rik     | Alg11                |
| AK077587                   | Alk                  |
| AK077682                   | Alox12               |
| AK078307                   | Alpk2                |
| AK078316                   | Alpk3                |
| AK078979                   | Als2cl               |
| AK079280                   | Als2cr11             |
| AK079380                   | Als2cr11             |
| AK079657                   | Als2cr12             |
| AK079777                   | Alx1                 |
| AK079938                   | Alx4                 |
| AK079957                   | Ambn                 |
| AK079958                   | Amigo2               |
| AK080176:Ppp4r1l-ps        | Amigo3               |
| AK080816:AK138135          | Amotl1               |
| AK081136                   | Ampd3                |
| AK081140                   | Amtn                 |
| AK081879                   | Ang                  |
| AK082072                   | Ang:2010317E24Rik    |
| AK082104                   | Angel1               |
| AK082264:mKIAA1112:Arhgef4 | Angpt1:mKIAA0003     |
| AK082503:AK032654          | Angpt2               |
| AK082514                   | Angptl2              |
| AK082757                   | Angptl7              |
| AK082896                   | Ankar                |
| AK082948                   | Ankle1               |
| AK083054                   | Ankrd1               |

|                            |                 |
|----------------------------|-----------------|
| AK083197                   | Ankrd26         |
| AK083706:AK051321:AK136164 | Ankrd34b        |
| AK083927:AK033069          | Ankrd36         |
| AK084170                   | Ankrd5:BC034902 |
| AK084494                   | Ankrd50         |
| AK084517:AK016788          | Ankrd55         |
| AK084903:4632427E13Rik     | Ankrd9          |
| AK085136                   | Anks4b          |
| AK085325                   | AnMKRN1         |
| AK085365:AK048993          | Ano2            |
| AK086010:AK087237:BC099577 | Anpep           |
| AK086149                   | Antxr2          |
| AK086355                   | Anubl1          |
| AK086439                   | Anxa1:AK170612  |
| AK086712:AK039108          | Anxa2           |
| AK086736                   | Anxa3           |
| AK086881                   | Anxa4           |
| AK086914                   | Anxa5           |
| AK087264:AK004221          | Aoah            |
| AK087292                   | Aoc2            |
| AK087376                   | Aox1            |
| AK087393                   | Aox3            |
| AK087910                   | Aox3l1          |
| AK088959:AK080350:Snora74a | Apbb1ip         |
| AK089957                   | Apex1           |
| AK090251                   | Apex2           |
| Ak1                        | Apitd1          |
| AK129341                   | ApIn            |
| AK132074                   | Apoa2           |
| AK132154                   | Apob            |
| AK133391                   | Apob48r         |
| AK133650                   | Apobec1         |
| AK133808                   | Apobec3         |
| AK134400                   | Apoc1           |
| AK134493:BC086906          | Apod            |
| AK134636                   | Apoh            |
| AK134637:BC072662          | Apol10a         |
| AK134715                   | Apol6           |
| AK134755                   | Aqp1            |
| AK134928                   | Aqp9            |

|                                   |                    |
|-----------------------------------|--------------------|
| AK134933                          | Ar                 |
| AK134945                          | Arap1              |
| AK135254                          | Arap3              |
| AK135744                          | Areg               |
| AK135997                          | Arg2               |
| AK136017                          | Arhgap10           |
| AK136844                          | Arhgap11a          |
| AK136863                          | Arhgap18           |
| AK137397                          | Arhgap25:mKIAA0053 |
| AK138201                          | Arhgap27           |
| AK138287:AK087483                 | Arhgap28           |
| AK138296                          | Arhgap30           |
| AK138328                          | Arhgap31:Cdgap     |
| AK138348                          | Arhgap36           |
| AK138505                          | Arhgap4            |
| AK138792                          | Arhgap40           |
| AK138949                          | Arhgef33           |
| AK139053:AK045112                 | Arhgef37           |
| AK139076                          | Arhgef5            |
| AK139295                          | Arhgef6            |
| AK139461                          | Arl11              |
| AK139522                          | Arl4d              |
| K139999:AK039536:BC029127:AK04597 | Armc3              |
| AK140147                          | Armc4              |
| AK140192                          | Arntl2             |
| AK140265                          | Arpm1              |
| AK140370:AK089118:Mir670          | Arr3               |
| AK140446                          | Art3:art3          |
| AK140547                          | Asb10              |
| AK140580                          | Asb2               |
| AK140583                          | Asb4               |
| AK141565                          | Asb5               |
| AK141672                          | Asb9               |
| AK142161                          | Ascl1              |
| AK143160                          | Ascl2              |
| AK143926                          | Ascl4:AK018959     |
| AK144267                          | Asf1b              |
| AK144664                          | Aspm:Asp           |
| AK144897                          | Aspn               |
| AK145129                          | Asprv1             |

|                   |                     |
|-------------------|---------------------|
| AK145430          | Asz1                |
| AK145433          | Atf3                |
| AK146025          | Atf7ip2             |
| AK147121          | Athl1               |
| AK149000          | Atoh8:okadin type I |
| AK150559          | Atp10b              |
| AK153645          | Atp13a4             |
| AK156477          | Atp13a5             |
| AK158612          | Atp1b4              |
| AK158619:AK043607 | Atp2b4              |
| AK158929:AK162963 | Atp6v0a2            |
| AK160548          | Atp6v1c2:Atp6c2     |
| AK160668          | Atp8b4              |
| AK161424          | AU015228            |
| AK162870          | AU015836            |
| AK162965          | AU018091            |
| AK163099          | AU021034            |
| AK163121          | Aurka               |
| AK163160          | Aurkb               |
| AK163292          | AV249152            |
| AK163440          | AW112010            |
| AK163532          | Axl                 |
| AK163775          | AY074887            |
| AK164126          | AY096003:Mir155     |
| AK164218          | AY512908            |
| AK164875          | AY512915            |
| AK165205:AK142001 | AY512917            |
| AK165802:AK033426 | AY512943            |
| AK166773          | B230319C09Rik       |
| AK169509          | B3gnt3              |
| AK169831          | B3gnt9-ps           |
| AK170112          | B430306N03Rik:Crkr  |
| AK170353          | B430319G15Rik       |
| AK170409          | B4galnt2            |
| AK170837          | B4galt7             |
| AK171159          | B930003M22Rik       |
| AK171764          | B930059L03Rik       |
| AK171953          | Bace2               |
| AK171960          | Bahcc1:KIAA1447     |
| AK171985:AK048571 | Baiap2l1            |



|                 |                            |
|-----------------|----------------------------|
| AK172428:Ubxn1  | Bambi-ps1                  |
| AK177174        | Bard1                      |
| AK177731        | Batf                       |
| AK184603        | Baz1a                      |
| AK184713        | Bbox1                      |
| AK185681        | Bbs10                      |
| AK189432        | Bbs12                      |
| AK189470        | Bbs9                       |
| AK191723        | Bbx:Hbp2                   |
| AK192544        | BC013712                   |
| AK194005        | BC017612:Fn5               |
| AK197782        | BC019639                   |
| AK199258        | BC020402                   |
| AK199495        | BC021767                   |
| Ak2             | BC021785                   |
| AK200600        | BC021891                   |
| AK201601        | BC024582                   |
| AK202078        | BC025190                   |
| AK202301        | BC025920                   |
| AK202494        | BC026439                   |
| AK202543        | BC026600                   |
| AK204443        | BC027685                   |
| AK205379        | BC028528                   |
| AK205396        | BC030307:Gnn               |
| AK206940        | BC030398                   |
| AK207688        | BC030499:BC059191          |
| AK208460        | BC032181:AK137243:AK089615 |
| AK209590        | BC033916                   |
| AK209647        | BC034090                   |
| AK210533        | BC035044                   |
| AK211659        | BC035532                   |
| AK216440        | BC037032                   |
| AK216824        | BC038278                   |
| AK216824        | BC038474                   |
| AK217757        | BC038929                   |
| AK217941        | BC039791                   |
| AK217986        | BC039940                   |
| AK220028        | BC040754                   |
| AK220484:Greb1l | BC040816                   |
| Ak3             | BC044868                   |

|                       |                   |
|-----------------------|-------------------|
| Ak4                   | BC044870          |
| Ak5                   | BC046331          |
| Ak8                   | BC046404          |
| Akap1                 | BC047216          |
| Akap10                | BC048080          |
| Akap11                | BC048584          |
| Akap12                | BC048720          |
| Akap13                | BC049635          |
| Akap17b               | BC049715:AK044622 |
| Akap5                 | BC049716          |
| Akap6                 | BC050122          |
| Akap7:AK076839        | BC050140:AK018427 |
| Akap8:AKAP95          | BC050972          |
| Akap81:NAKAP95        | BC051019          |
| Akap9                 | BC051516          |
| Akirin1               | BC053393          |
| Akirin2               | BC053749          |
| Akr1a4                | BC055324          |
| Akr1b10:2310005E10Rik | BC056189          |
| Akr1c19               | BC057022          |
| Akr1e1                | BC060267          |
| Akr7a5                | BC062254          |
| Akt1                  | BC063263          |
| Akt1s1                | BC064078          |
| Akt2:AK206940         | BC064714          |
| Akt3                  | BC064812          |
| Aktip                 | BC064812          |
| Alad                  | BC065149:Cxxc4    |
| Alas1                 | BC065397          |
| Alcam                 | BC067033          |
| Aldh18a1              | BC067249          |
| Aldh1a1               | BC070425:AK045070 |
| Aldh1b1               | BC071190          |
| Aldh1l1               | BC072643          |
| Aldh1l2               | BC075659          |
| Aldh2                 | BC089597          |
| Aldh3a2               | BC094226:AK044848 |
| Aldh3b2               | BC094633          |
| Aldh4a1               | BC094916          |
| Aldh5a1               | BC096037          |

|                 |                   |
|-----------------|-------------------|
| Aldh6a1         | BC098222:AK050351 |
| Aldh7a1         | BC099571          |
| Aldh9a1         | BC099582          |
| Aldoa           | BC100427          |
| Aldob           | BC106179          |
| Aldoc           | BC108272          |
| Alg1            | BC125002          |
| Alg10b          | BC145649          |
| Alg12           | Bcam              |
| Alg13           | Bcl2a1b           |
| Alg13           | Bcl2a1d           |
| Alg14           | Bcl2l12           |
| Alg2            | Bcl2l14           |
| Alg3            | Bdh2              |
| Alg5            | Bend3             |
| Alg6            | Bend4             |
| Alg8            | Bend7             |
| Alg9            | Best3             |
| Alkbh1          | Bet3l             |
| Alkbh2          | Bgn               |
| Alkbh3          | Bhlhe23           |
| Alkbh4          | Bhlhe41           |
| Alkbh5          | Blnk              |
| Alkbh6          | Bloc1s3           |
| Alkbh7          | Bmf               |
| Alkbh8          | Bmp3              |
| Alms1           | Bmp5              |
| Alox5ap         | Bmp7              |
| Aloxe3          | Bmper             |
| alpha1B:Cacna1b | Bmpr2             |
| Alpk1:mKIAA1527 | Bmx               |
| Als2            | Bnc2              |
| Als2cr4         | Brca1             |
| Amacr           | Brca2             |
| Ambra1          | Brip1             |
| Amd2            | Brs3              |
| Amdhd1          | Brwd1             |
| Amdhd2          | Bspry             |
| Amfr            | Btg4              |
| Amigo1          | Btk               |

|               |                             |
|---------------|-----------------------------|
| Ammechr1      | Btla                        |
| Ammechr1l     | Btn1a1                      |
| Amn           | Btnl3                       |
| Amn1          | Bub1                        |
| Amot          | Bub1b                       |
| Amotl2        | Butr1                       |
| Ampd2         | C030002c11rik               |
| Amph          | C030016D13Rik               |
| Amt           | C030034L19Rik               |
| Amy1          | C130026I21Rik               |
| Amz1          | C130026I21Rik:A530032D15Rik |
| Amz2:AK085963 | C130050O18Rik               |
| Anapc1        | C130079G13Rik               |
| Anapc10       | C1galt1                     |
| Anapc11       | C1qb                        |
| Anapc13       | C1qc                        |
| Anapc16       | C1ql2                       |
| Anapc2        | C1qtnf1                     |
| Anapc4        | C1qtnf3                     |
| Anapc5        | C1ra                        |
| Anapc7        | C1rl                        |
| Angel2        | C1s                         |
| Angptl1       | C230035I16Rik               |
| Angptl3       | C230071H18Rik               |
| Angptl6       | C2cd4b                      |
| Ank           | C3                          |
| Ank1          | C330024D21Rik               |
| Ank2:AK081244 | C3ar1                       |
| Ank3          | C4a:C4b                     |
| Ankdd1b       | C4bp                        |
| Ankfy1:Ankhzn | C530005A16Rik               |
| Ankhd1        | C5ar1                       |
| Ankle2        | C79407:Knl2                 |
| Ankmy2        | C86187                      |
| Ankra2        | C87414                      |
| Ankrd10       | C8g                         |
| Ankrd11       | Cacna1e                     |
| Ankrd11       | Cacna1f                     |
| Ankrd12       | Cacna2d4                    |
| Ankrd13a      | CacnB2                      |

|                  |                         |
|------------------|-------------------------|
| Ankrd13b         | Cacng7                  |
| Ankrd13c         | Cage1                   |
| Ankrd13d         | Calcb                   |
| Ankrd16          | Calcl                   |
| Ankrd17          | Calm4                   |
| Ankrd23          | Calr3                   |
| Ankrd24          | Calr4                   |
| Ankrd27          | Cap1                    |
| Ankrd28          | Capg                    |
| Ankrd29          | Capn1                   |
| Ankrd32          | Capn11                  |
| Ankrd33b         | Capn3                   |
| Ankrd34a         | Capn6                   |
| Ankrd35          | Capn8                   |
| Ankrd37          | Capn9                   |
| Ankrd39          | Car13                   |
| Ankrd40          | Car3                    |
| Ankrd42          | Card10                  |
| Ankrd43          | Card11                  |
| Ankrd44          | Carf                    |
| Ankrd45          | Carm1                   |
| Ankrd46          | Carns1                  |
| Ankrd49          | Casc1                   |
| Ankrd50          | Casc5                   |
| Ankrd52          | Casp1                   |
| Ankrd54          | Casp11:Casp4            |
| Ankrd57          | Casp12                  |
| Ankrd6:mKIAA0957 | Casq1                   |
| Anks1            | Cast                    |
| Anks1b           | Catsper2                |
| Anks3            | Catsper4                |
| Anks6            | Catsperb                |
| Ankzf1           | Catsperg1:A230107C01Rik |
| Anln             | Catsperg2:Catsperg1     |
| Ano10            | Cav1                    |
| Ano3             | Cblc                    |
| Ano4             | Cbll1                   |
| Ano5             | Cbr3                    |
| Ano6             | Cbs                     |
| Ano8             | Ccdc102a                |

|               |                       |
|---------------|-----------------------|
| Anp32a        | Ccdc105               |
| Anp32b        | Ccdc109a              |
| Anp32e        | Ccdc11                |
| Anxa6         | Ccdc110               |
| Anxa7         | Ccdc113               |
| Aox4          | Ccdc114               |
| Ap1ar         | Ccdc122               |
| Ap1b1         | Ccdc126               |
| Ap1g1         | Ccdc129               |
| Ap1g2         | Ccdc141               |
| Ap1m1         | Ccdc142               |
| Ap1s1         | Ccdc144b              |
| Ap1s2         | Ccdc146               |
| Ap1s3         | Ccdc150               |
| Ap2a1         | Ccdc151               |
| Ap2b1         | Ccdc152               |
| Ap2m1         | Ccdc157               |
| Ap2s1         | Ccdc158               |
| Ap3b1         | Ccdc162               |
| Ap3b2         | Ccdc163:0610037D15Rik |
| Ap3d1         | Ccdc18                |
| Ap3m1         | Ccdc36                |
| Ap3m2         | Ccdc38                |
| Ap3s1         | Ccdc40                |
| Ap3s2         | Ccdc57                |
| Ap4b1         | Ccdc63                |
| Ap4e1         | Ccdc65                |
| Ap4m1         | Ccdc67                |
| Ap4s1         | Ccdc68                |
| Apaf1         | Ccdc69                |
| Apba1         | Ccdc76                |
| Apba2         | Ccdc79                |
| Apba3:Mir3057 | Ccdc81                |
| Apbb1         | Ccdc87                |
| Apbb2         | Ccdc88b               |
| Apbb3         | Ccdc96                |
| Apc           | Ccdc99                |
| Apc2          | Cckbr                 |
| Apccd1        | Ccl1                  |
| Apeh          | Ccl2                  |

|                     |               |
|---------------------|---------------|
| apg-1b:Hspa4I       | Ccl4:ScyA4    |
| APG16L:Atg16I1      | Ccl5          |
| Aph1a               | Ccl6          |
| Aph1c:Aph1b         | Ccl9          |
| Api5:AK078801       | Ccnb1         |
| Apip                | Ccnb2         |
| Aplf                | Ccnd3         |
| Appl1               | Ccno          |
| Appl2               | Ccr3          |
| Apoa1bp             | Ccr5          |
| Apoe                | Ccr9:AK038272 |
| Apold1              | Cct6b         |
| Apoo                | Cd14          |
| Apool:AK086522      | Cd160         |
| App                 | Cd163         |
| Appbp2              | Cd163I1       |
| Appl1               | Cd164I2       |
| Appl2               | Cd180         |
| Aprt:aprt           | Cd1d2:Cd1d1   |
| Aptx                | Cd200r1       |
| Aqp11               | Cd200r4       |
| Aqp4                | Cd247         |
| Aqp7                | Cd248         |
| Aqr:mKIAA0560       | Cd28          |
| Araf                | Cd300a        |
| Arap2               | Cd300Ib       |
| Arc                 | Cd300Id       |
| Arcn1               | Cd300Ig       |
| Arf1                | Cd36          |
| Arf2                | Cd46:CD46     |
| Arf3                | Cd48          |
| Arf4                | Cd59b         |
| Arf5                | Cd5I          |
| Arf6                | Cd72          |
| Arfgap1             | Cd80          |
| Arfgap2             | Cd84          |
| Arfgap3             | Cd86          |
| Arfgef1:AK134369    | Cd8a          |
| Arfgef2             | Cd9           |
| Arfgef3:D10Bwg1379e | Cd96          |

|                    |                     |
|--------------------|---------------------|
| Arfip1:Glt28d2     | Cd97                |
| Arfip2             | Cda                 |
| Arfrp1             | Cdc14a              |
| Arglu1             | Cdc20               |
| Arhgap1            | Cdc42bpg            |
| Arhgap12           | Cdc45               |
| Arhgap15           | Cdc6:cdc6           |
| Arhgap17           | Cdca2               |
| Arhgap19           | Cdca3               |
| Arhgap20           | Cdca5               |
| Arhgap21           | Cdca7               |
| Arhgap22           | Cdca7l              |
| Arhgap23           | Cdh19               |
| Arhgap24           | Cdh22               |
| Arhgap26:mKIAA0621 | Cdh23               |
| Arhgap29           | Cdh26               |
| Arhgap32           | Cdh5                |
| Arhgap33           | Cdh6                |
| Arhgap39           | Cdh7                |
| Arhgap42           | Cdhr2               |
| Arhgap44:Rich2     | Cdhr3:1110049B09Rik |
| Arhgap5            | Cdk1                |
| Arhgap6            | Cdk15               |
| Arhgdia            | Cdk2                |
| Arhgdib            | Cdk5rap2            |
| Arhgdig            | Cdk6                |
| Arhgef1:mFLJ00369  | Cdkn2b              |
| Arhgef10:mKIAA0294 | Cdkn2c              |
| Arhgef10l          | Cdkn3               |
| Arhgef11           | Cdnf                |
| Arhgef12           | Cdr2                |
| Arhgef17           | Cdt1                |
| Arhgef18           | Cdv3                |
| Arhgef2:mKIAA0651  | Cdyl                |
| Arhgef25           | Ceacam1             |
| Arhgef26           | Ceacam5             |
| Arhgef3:AK036749   | Ceacam9             |
| Arhgef7            | Cebpa               |
| Arhgef9            | Cecr2               |
| Arid1a             | Cecr5               |



|                  |                 |
|------------------|-----------------|
| Arid1b           | Cela1           |
| Arid2            | Cela2a          |
| Arid3a           | Celsr1          |
| Arid3b           | Cenpf           |
| Arid4a           | Cenpi           |
| Arid4b           | Cenpl           |
| Arid5a           | Cenpn           |
| Arid5b           | Cenpq           |
| Arih1:AK050838   | Cep55           |
| Arih2:Ari2       | Cep76           |
| Arkadia:Rnf111   | Cerkl           |
| Arl1             | Ces1g           |
| Arl13b           | Ces2a           |
| Arl15            | Cfh             |
| Arl16            | Cgnl1           |
| Arl2             | Chaf1b          |
| Arl2bp           | Chchd5          |
| Arl3             | Chd7            |
| Arl4a            | Chek1           |
| Arl4c            | Chek2           |
| Arl5a            | Chia            |
| Arl5b            | Chmp4c:BC020394 |
| Arl5c            | Chrd1           |
| Arl6             | Chrm2           |
| Arl6ip1          | Chrm5           |
| Arl6ip4          | Chrnbl          |
| Arl6ip5          | Chst14          |
| Arl6ip6          | Chst7           |
| Arl8a            | Chtf18          |
| Arl8b            | Ciita:AK163054  |
| Armc1            | Cited1          |
| Armc10           | Cited4          |
| Armc2            | CK137956        |
| Armc5            | Ckap2           |
| Armc6            | Ckmt2           |
| Armc7            | Cks2            |
| Armc8            | Clast2:Syng2    |
| Armc9            | Clca3           |
| Armcx1           | Clca4           |
| Armcx2:mKIAA0512 | Clca5:Clca2     |

|                |                |
|----------------|----------------|
| Armcx3         | Clcf1          |
| Armcx4         | Clcn1          |
| Armcx5         | Clcn5          |
| Armcx6         | Clcn6          |
| Arnt:mKIAA4051 | Cldn10         |
| Arnt2          | Cldn11         |
| Arntl:bmal1b   | Cldn16         |
| Arpc1a:Sid329  | Cldn20         |
| Arpc1b         | Cldn23         |
| Arpc2          | Clec10a        |
| Arpc3          | Clec12a        |
| Arpc4          | Clec12b        |
| Arpc5          | Clec18a:Mrcl   |
| Arpc5l         | Clec1a         |
| Arpp19         | Clec1b         |
| Arpp21         | Clec2g         |
| Arrb1          | Clec2i         |
| Arrb2          | Clec3b         |
| Arrdc1         | Clec4a1        |
| Arrdc2         | Clec4a2        |
| Arrdc4         | Clec4a3        |
| Arsa           | Clec4d:Mcl     |
| Arsb           | Clec4n         |
| Arsg           | Clec5a:Mdl1    |
| Arsk           | Clec7a         |
| Arv1           | Clic1          |
| Arvcf          | Clic5          |
| Arx            | Clic6          |
| As3mt:Cyt19    | Cln5           |
| Asah1          | Cln6           |
| Asah2          | Clnk           |
| Asap1:Shag1    | Clspr          |
| Asap2          | Clvs1          |
| Asap3          | Cmah:CMAH      |
| Asb1:mKIAA1146 | Cml3:cml3      |
| Asb13          | Cml5           |
| Asb14          | Cmtm2b         |
| Asb3           | Cmtm4          |
| Asb6           | Cmtm7          |
| Asb7           | Cmtm8:AK161079 |

|                     |                   |
|---------------------|-------------------|
| Asb8                | Cndp1             |
| Ascc1               | Cnga1             |
| Ascc2               | Cnga3             |
| Ascc3               | Cngb3             |
| Asf1a               | Cnksr3            |
| Ash1l               | Cnn1              |
| Ash2l               | Cnpy1             |
| Asl                 | Cntf              |
| Asna1               | Cntln             |
| Asns                | Cntnap3           |
| Asnsd1              | Cntnap5a          |
| Aspdh               | Cobll1            |
| Asph                | Col10a1           |
| Asphd1              | Col13a1           |
| Asphd2              | Col14a1           |
| Aspscr1             | Col16a1           |
| Asrgl1              | Col18a1           |
| Ass1                | Col19a1           |
| Aste1               | Col1a1            |
| Astn1               | Col22a1           |
| Astn2:mKIAA0634     | Col24a1           |
| Asxl1               | Col27a1:mKIAA1870 |
| Asxl2               | Col4a3            |
| Asxl3               | Col4a4            |
| Atad1               | Col4a5            |
| Atad2               | Col5a3            |
| Atad2b              | Col6a3            |
| Atad3a:AK154077     | Col6a4            |
| Atad5               | Col6a6            |
| Atat1:2610110G12Rik | Col7a1:Mir711     |
| Atcay               | Col8a1:AK051864   |
| Ate1                | Col8a2            |
| Atf1                | Col9a1            |
| Atf2                | Col9a2            |
| Atf4                | Colec10           |
| Atf5                | Colec11           |
| Atf6                | Colec12           |
| Atf6b               | Copz2             |
| Atf7                | Corin             |
| Atf7ip              | Cox6b2            |

|                 |          |
|-----------------|----------|
| Atg10           | Cp       |
| Atg12           | Cpa2     |
| Atg13           | Cpa4     |
| Atg14           | Cpb2     |
| Atg16l2         | Cpne9    |
| Atg2a:mKIAA0404 | Cps1     |
| Atg2b           | Cps1     |
| Atg3            | Cpsf4l   |
| Atg4a           | Cpt2     |
| Atg4b           | Cr2      |
| Atg4c           | Crb1     |
| Atg4d           | Creb3l2  |
| Atg5            | Crebl2   |
| Atg7            | Crip1    |
| Atg9a:Atg9      | Crip3    |
| Atic            | Crisp2   |
| Atl1            | Crisp3   |
| Atl2            | Crisp4   |
| Atl3            | Crispld1 |
| Atm             | Crkl     |
| Atmin           | Crp      |
| Atn1            | Crtap    |
| Atoh7:AK005214  | Crybb3   |
| Atox1           | Cryga    |
| Atp10a          | Crygn    |
| Atp10d          | Crygs    |
| Atp11a          | Csf1     |
| Atp11b          | Csf2rb2  |
| Atp11c          | Csmd2    |
| Atp13a1         | Csn1s1   |
| Atp13a2         | Csn1s2b  |
| Atp13a3         | Csn3     |
| Atp1a1          | Csprs    |
| Atp1a2          | Csrnp1   |
| Atp1a3          | Csrp1    |
| Atp1b1          | Csrp3    |
| Atp1b2          | Cstad    |
| Atp1b3          | Ctdsp1   |
| Atp2a2          | Ctf1     |
| Atp2b1          | Cth      |

|                  |                    |
|------------------|--------------------|
| Atp2b2:PMCA2     | Ctla2b             |
| Atp2b3           | Ctla4:ctla-4       |
| Atp2c1:AK032255  | Ctnna3             |
| Atp4a            | Cts7               |
| Atp5a1           | Cts8-ps            |
| Atp5b            | Ctsc               |
| Atp5c1           | Ctse               |
| Atp5d            | Ctsh               |
| Atp5e            | Ctsj               |
| Atp5f1           | Ctsq               |
| Atp5g1           | Ctsr               |
| Atp5g2           | Cubn               |
| Atp5g3           | Cxcl10             |
| Atp5h            | Cxcl11             |
| Atp5j            | Cxcl13             |
| Atp5j2:AK164124  | Cxcl9              |
| Atp5k            | Cxcr4              |
| Atp5l            | Cxcr7              |
| Atp5o            | Cyb5r2             |
| Atp5s            | Cyb5r1:mFLJ00377   |
| Atp5sl           | Cybb               |
| Atp6ap1          | Cybrd1             |
| Atp6ap2          | Cylc1              |
| Atp6v0a1         | Cylc2              |
| Atp6v0b          | Cyp11a1            |
| Atp6v0c          | Cyp1b1             |
| Atp6v0c          | Cyp20a1            |
| Atp6v0d1         | Cyp26a1            |
| Atp6v0e          | Cyp27a1            |
| Atp6v0e2         | Cyp2a4             |
| Atp6v1a:BC050135 | Cyp2c29:Cyp2c53-ps |
| Atp6v1b2         | Cyp2c38            |
| Atp6v1c1         | Cyp2c39            |
| Atp6v1d          | Cyp2c65            |
| Atp6v1e1         | Cyp2c69            |
| Atp6v1f          | Cyp2e1             |
| Atp6v1g1         | Cyp2g1             |
| Atp6v1h          | Cyp2j5             |
| Atp7a            | Cyp2j9             |
| Atp8a1           | Cyp3a16            |

|                     |                             |
|---------------------|-----------------------------|
| Atp8a2              | Cyp3a25                     |
| Atp8b2              | Cyp3a41a                    |
| Atp9a               | Cyp3a44                     |
| Atp9b:MMR           | Cyp3a57                     |
| Atpaf1              | Cyp4a32                     |
| Atpaf2              | Cyp4b1                      |
| Atpase6             | Cyp4f13                     |
| Atpase6             | Cyp4f15                     |
| Atpbd4              | Cyp4f16                     |
| Atpif1              | Cyp4f17                     |
| Atr:mKIAA4069       | Cyp4v3                      |
| Atrip:6620401K05Rik | Cyp7a1                      |
| Atrn                | Cysltr1                     |
| Atrn1               | Cysltr2                     |
| Atrx                | Cytip:AK170301              |
| Atxn1               | D030025P21Rik               |
| Atxn10              | D030028A08Rik               |
| Atxn11              | D10920                      |
| Atxn2               | D130009I18Rik               |
| Atxn2l              | D130040H23Rik               |
| Atxn3               | D14Ert668e:Phf11            |
| Atxn7               | D17H6S56E-3                 |
| Atxn7l1             | D330012F22Rik               |
| Atxn7l2             | D330045A20Rik               |
| Atxn7l3             | D330050I16Rik               |
| Atxn7l3b            | D430020J02Rik               |
| AU019823            | D5Ert605e                   |
| AU022252            | D630002G06Rik:C730048C13Rik |
| AU040320            | D630011A20Rik               |
| AU041133            | D630029K05Rik               |
| Auh                 | D630041G03Rik               |
| Aup1                | D630042F21Rik               |
| Aurkaip1            | D630042P16Rik               |
| Auts2               | D730039F16Rik               |
| Aven                | D930014E17Rik               |
| Avil                | D930020B18Rik               |
| Avpi1               | D930048N14Rik               |
| Avpr1a              | Daam2                       |
| AW146154            | Dach1                       |
| AW209491            | Dach2                       |

|                             |                  |
|-----------------------------|------------------|
| AW549877                    | Dazl             |
| AW551984                    | Dbf4             |
| AW555464                    | Dbil5            |
| Axin1                       | Dbx2             |
| Axin2                       | Dcaf12l2         |
| Azi1                        | Dct              |
| Azi2:AZ2                    | Dctd             |
| Azin1                       | Dcxr             |
| B020018G12Rik               | Ddb2             |
| B130006D01Rik               | Ddc              |
| B230118H07Rik               | Ddi2             |
| B230120H23Rik               | Ddo:DDO          |
| B230206F22Rik               | Ddr1             |
| B230208H17Rik:Parf          | Ddr2             |
| B230217C12Rik               | Ddx4             |
| B230219D22Rik               | Ddx43            |
| B230307C23Rik:A630089N07Rik | Ddx49            |
| B230312A22Rik:mKIAA1539     | Ddx60            |
| B230315N10Rik:Zfp938        | Decr1            |
| B230339M05Rik:Ralgapb       | Defb1            |
| B230354K17Rik:AK046225      | Defb12           |
| B2m:BC002288                | Defb46-ps        |
| B330016D10Rik               | Dennd2c          |
| B3galnt1                    | Depdc1a          |
| B3galt1                     | Det1             |
| B3galt2                     | Dfnb59           |
| B3galt4                     | Dgkk             |
| B3galt5                     | Dgkq             |
| B3galt6                     | Dhdh             |
| B3galntl                    | Dhfr             |
| B3gat1                      | Dhh              |
| B3gat2                      | Dhrs3            |
| B3gat3                      | Dhrs7c           |
| B3gnt2                      | Dhtkd1:mKIAA1630 |
| B3gnt5                      | Dhx34:mKIAA0134  |
| B3gntl1                     | Dhx58:D11lgp2    |
| B430203M17Rik               | Dia2:Diap3       |
| B430212C06Rik               | Dio2             |
| B4galnt1                    | Dio3             |
| B4galnt4                    | Disp1            |

|                     |                   |
|---------------------|-------------------|
| B4galt1             | Dkk1              |
| B4galt2             | Dkk2              |
| B4galt3             | Dleu2             |
| B4galt4             | Dlgap5:mKIAA0008  |
| B4galt5             | Dlk1              |
| B4galt6             | Dll3              |
| B630005N14Rik       | Dll4              |
| B630019K06Rik       | Dlx4              |
| B830017H08Rik       | Dlx5              |
| B930041F14Rik       | Dmbx1             |
| B9d1                | Dmc1              |
| B9d2                | Dmgdh             |
| Baalc               | Dmp1              |
| Bace1:Bace          | Dmpk              |
| Bach1               | Dmrt3             |
| Bach2               | Dmrta1            |
| Bad                 | Dmrta2            |
| Bag1                | Dmrta1a           |
| Bag2                | Dmrta1b           |
| Bag3                | Dna2:mKIAA0083    |
| Bag4                | Dnahc10           |
| Bag5                | Dnahc17:mKIAA3028 |
| Bahd1               | Dnahc2            |
| Bai1:mKIAA4089      | Dnahc8            |
| Bai2                | Dnaic1            |
| Bai3                | Dnaic2            |
| Baiap2              | Dnajb3            |
| Bak1                | Dnajc28           |
| Bambi               | Dnase111          |
| Banf1               | Dnmbp             |
| Bank1               | Dnmt3b            |
| Banp                | Dnmt3l            |
| Bap1                | Dntt              |
| Basp1               | Dock1             |
| Bat1a               | Dock5             |
| Bat2d:Prrc2c:Bat2l2 | Dok1              |
| Bat3:AK209492       | Dok2              |
| Bax                 | Dpep2             |
| Baz1b:Wbscr9        | Dpf3              |
| Baz2b               | Dpp4              |



|                    |                            |
|--------------------|----------------------------|
| Bbc3               | Dppa1                      |
| Bbip1              | Dppa3                      |
| Bbs1               | Dpy19I2                    |
| Bbs2               | Dpy19I4                    |
| Bbs4               | DQ072388:DQ072391:DQ072390 |
| Bbs5               | DQ540346                   |
| Bbs7               | DQ544519                   |
| BC002163           | DQ546911                   |
| BC002221           | DQ547239                   |
| BC002230:AK032800  | DQ548994                   |
| BC003266           | DQ549139                   |
| BC003331           | DQ549194                   |
| BC003348           | DQ556540                   |
| BC003965           | DQ560618                   |
| BC004004           | DQ560772                   |
| BC005537           | DQ567485                   |
| BC005561           | DQ568359                   |
| BC005624           | DQ686689                   |
| BC005764           | DQ687290                   |
| BC006965           | DQ688647                   |
| BC013529           | DQ692500                   |
| BC016423           | DQ693245                   |
| BC016495           | DQ693426                   |
| BC017158           | DQ693432                   |
| BC017643           | DQ694056                   |
| BC017647:AK211079  | DQ695187                   |
| BC018507:mKIAA0947 | DQ695223                   |
| BC019819           | DQ697005                   |
| BC019943           | DQ702572                   |
| BC020150:AK015855  | DQ704374                   |
| BC022687           | DQ707024                   |
| BC023202           | DQ708189                   |
| BC023483           | DQ709126                   |
| BC023814           | DQ710814                   |
| BC023829:AK197085  | DQ711212                   |
| BC024479           | DQ715729                   |
| BC024571           | DQ716436                   |
| BC024659           | DQ718766                   |
| BC024814           | DQ725849                   |
| BC024978           | Dqx1                       |

|                                    |                     |
|------------------------------------|---------------------|
| BC025067:BC096391:Snora24          | Drd1a               |
| BC025885                           | Dsc3                |
| BC026208                           | Dsg1a               |
| BC026590                           | Dsg2                |
| BC027231                           | Dsn1                |
| BC027344:Zfp940                    | Dsp                 |
| BC027359:AK045225                  | Dthd1               |
| BC029214                           | Duox2               |
| BC029722                           | Dupd1               |
| BC029726:AK005503                  | Dus4l               |
| BC030336                           | Dusp10              |
| BC030470                           | Dusp4               |
| BC030500                           | Dydc2               |
| BC031181                           | Dynlrb2             |
| BC031353                           | Dysf                |
| BC031361                           | E030003E18Rik       |
| BC031503                           | E030019B06Rik       |
| BC031781                           | E030037K03Rik:Pydc3 |
| BC032203                           | E130114P18Rik       |
| BC037034                           | E130203B14Rik       |
| BC037369                           | E130306D19Rik       |
| BC038155:AK020235                  | E230008N13Rik       |
| BC038328                           | E230016K23Rik       |
| BC040804                           | E230019M04Rik       |
| BC043934                           | E230029C05Rik       |
| BC048355                           | E2f2                |
| BC048403:AK162911                  | E2f7                |
| BC048546                           | E2f8                |
| BC048731                           | E330013P04Rik       |
| BC048766                           | Eaf2:Traits         |
| BC049265:Tub                       | Ears2               |
| BC049805                           | Ebf1:Ebf4           |
| BC051142                           | Ebf2                |
| BC052040                           | Echdc1              |
| BC054353                           | Ecm2                |
| BC054394                           | Ect2                |
| 154406:AK013290:AK015657:2810442I2 | Eda2r               |
| BC055806                           | Edar                |
| BC056174                           | Edaradd             |
| BC056474                           | Edn1                |

|                            |                    |
|----------------------------|--------------------|
| BC058988                   | Ednra              |
| BC059025:AK045952:AK012713 | Efcab1             |
| BC060988                   | Efcab3             |
| BC062115:Zfp873            | Efcab4a            |
| BC062895                   | Efcab7             |
| BC064103                   | Efemp1             |
| BC064118                   | Efhb               |
| BC064456:AK155472          | Efhc2              |
| BC067010                   | Efhd1              |
| BC067068                   | Efna3              |
| BC067074                   | Efs                |
| BC068157                   | EG232599           |
| BC068281                   | EG625321           |
| BC071253                   | EG633640:Gm7120    |
| BC072557                   | Egflam             |
| BC075635                   | Egfr               |
| BC079612                   | Ehf                |
| BC079901                   | Eid3               |
| BC083167                   | Eif1ax             |
| BC085231:AK005481          | Eif2ak2            |
| BC086906:BC085231:AK005481 | Eif4ebp1           |
| BC088983                   | Eif5a2             |
| BC094334                   | Elf2:ELF2          |
| BC106127:AK040741          | Elf4               |
| BC106167                   | Emilin1            |
| BC134356                   | Eml1               |
| Bcan                       | Emr4               |
| Bcap29                     | En1                |
| Bcap31                     | Enam               |
| Bcar1                      | Enkur              |
| Bcar3                      | Eno3               |
| Bcas2                      | Enpp1              |
| Bcas3                      | Enpp3              |
| Bcat1                      | ENSMUSG00000054427 |
| Bcat2                      | ENSMUSG00000058934 |
| Bccip                      | Entpd1             |
| Bcdin3d                    | Epb4.1l4b          |
| Bche                       | Epha1              |
| Bckdhb                     | Eps8l1:Eps8R1      |
| Bckdk                      | Epsti1             |

|                        |                                                               |
|------------------------|---------------------------------------------------------------|
| Bcl10:AK171687         | Erb2ip:mKIAA1225                                              |
| Bcl11a                 | Erb2ip                                                        |
| Bcl11b                 | Erb2ip                                                        |
| Bcl2                   | Erb2ip                                                        |
| Bcl2l1                 | Erb2ip                                                        |
| Bcl2l11                | Erb2ip                                                        |
| Bcl2l13                | Erb2ip                                                        |
| Bcl2l15                | Erb2ip                                                        |
| Bcl2l2                 | Erb2ip                                                        |
| Bcl6                   | Erb2ip                                                        |
| Bcl6b                  | Erb2ip                                                        |
| Bcl7a                  | Erb2ip                                                        |
| Bcl7b:BCL7B            | Erb2ip                                                        |
| Bcl7c                  | Erb2ip                                                        |
| Bcl9                   | Erb2ip                                                        |
| Bcl9l                  | Erb2ip                                                        |
| Bclaf1:mKIAA0164       | Erb2ip                                                        |
| Bcmo1                  | Erb2ip                                                        |
| Bcng-1:Hcn1            | Erb2ip                                                        |
| Bcor:mKIAA1575         | EU234022                                                      |
| Bcor1                  | U523869:EU523868:EU523863:EU523862:EU523861:EU523858:EU523859 |
| Bcr                    | Erb2ip                                                        |
| Bcs1l                  | Erb2ip                                                        |
| Bdh1                   | Erb2ip                                                        |
| Bdnf                   | Erb2ip                                                        |
| Bdp1:mKIAA1241         | Erb2ip                                                        |
| Bean1                  | Erb2ip                                                        |
| Becn1                  | Erb2ip                                                        |
| Begain                 | Erb2ip                                                        |
| Bend5                  | Erb2ip                                                        |
| Bend6                  | Erb2ip                                                        |
| Bet1                   | Erb2ip                                                        |
| Bet1l                  | Erb2ip                                                        |
| Beta-s                 | Erb2ip                                                        |
| beta3GalNAcT2:B3galnt2 | F630028O10Rik:Mir223                                          |
| Bex1                   | F630042J09Rik                                                 |
| Bex2                   | F630043A04Rik:Ska3                                            |
| Bex4                   | F730043M19Rik                                                 |
| Bfar                   | F8                                                            |
| Bhlha9                 | F830002L21Rik                                                 |

|                 |                      |
|-----------------|----------------------|
| Bhlhb9          | F830016B08Rik        |
| Bhlhe22         | F930015N05Rik        |
| Bhlhe40         | Fabp12               |
| Bhmt            | Fabp4                |
| Bicc1           | Fadd                 |
| Bicd1:AK050809  | Fam101a              |
| Bicd2           | Fam107a              |
| Bid             | Fam109b              |
| Bin1            | Fam111a              |
| Bin3            | Fam119a              |
| Birc2           | Fam122b              |
| Birc5           | Fam129a:Niban        |
| Birc6:AK165120  | Fam13b               |
| Bivm            | Fam154a              |
| Blcap           | Fam159a              |
| Bles03:A1837181 | Fam159b              |
| Blm             | Fam160a1             |
| Blmh            | Fam164c              |
| Bloc1s1         | Fam167b              |
| Bloc1s2         | Fam169b              |
| Blvra           | Fam176b              |
| Blvrb           | Fam180a              |
| Blzf1           | Fam181a              |
| Bmi1            | Fam186b              |
| Bmp1:mKIAA4159  | Fam194a              |
| Bmp2            | Fam196b              |
| Bmp2k           | Fam198a              |
| Bmpr1a          | Fam198b              |
| Bmpr1b          | Fam26f               |
| Bms1            | Fam35a:3110001K24Rik |
| Bmyc            | Fam38b               |
| Bnip2:AK161900  | Fam40b:mKIAA1170     |
| Bnip3           | Fam46a               |
| Bnip3l          | Fam46c               |
| Boc             | Fam47e:Gm1381        |
| Bod1            | Fam53b               |
| Bod1l           | Fam54a               |
| Bok             | Fam55b               |
| Bola1           | Fam64a               |
| Bola2           | Fam71a               |

|                 |         |
|-----------------|---------|
| Bola3           | Fam71d  |
| Bop1            | Fam72a  |
| Bpag1:Dst       | Fam83d  |
| Bpgm            | Fam83h  |
| Bphl            | Fam98c  |
| Bpnt1           | Fan1    |
| BPOZ:Abtb1      | Fanca   |
| Bptf            | Fancb   |
| Braf            | Fancf   |
| Brap            | Fap     |
| Brcc3           | Farp2   |
| Brd1:mKIAA4191  | Fas     |
| Brd2            | Fasl    |
| Brd3            | Fbln2   |
| Brd4            | Fbln5   |
| Brd7            | Fbln7   |
| Brd8            | Fbxl13  |
| Brd9            | Fbxl8   |
| Brdt:Fsr3       | Fbxo17  |
| Bre             | Fbxo32  |
| Brf1            | Fbxo48  |
| Brf2            | Fbxo5   |
| Bri3            | Fbxw10  |
| Bri3bp          | Fcer1g  |
| Brix1           | Fcer2a  |
| Brms1:B3gnt1    | Fcgr1   |
| Brms1l          | Fcgr2b  |
| Brp16           | Fcgr4   |
| Brp44:AK008044  | Fcgrt   |
| Brp44l          | Fcrl6   |
| Brpf1           | Fdxacb1 |
| Brpf3:mKIAA1286 | Fes     |
| Brsk1           | Ffar2   |
| Brsk2           | Ffar3   |
| Brwd1:Wdr9      | Fgd2    |
| Brwd3           | Fgd6    |
| Bscl2           | Fgf1    |
| Bsdc1           | Fgf11   |
| Bsg             | Fgf16   |
| Bsn             | Fgf22   |

|                       |                                              |
|-----------------------|----------------------------------------------|
| Btaf1:TAF170          | Fgf3                                         |
| Btbd1                 | Fgf4                                         |
| Btbd10                | Fgf7                                         |
| Btbd11                | Fgfbp1                                       |
| Btbd12:Six4:mKIAA1784 | Fgg                                          |
| Btbd17                | Fgl1                                         |
| Btbd2                 | Fgl2                                         |
| Btbd3                 | Fhad1                                        |
| Btbd6                 | Fhdc1                                        |
| Btbd7                 | Fhl3                                         |
| Btbd9                 | Fhl4                                         |
| Btd                   | Fhod1                                        |
| Btf3                  | Fig                                          |
| Btf3l4                | Fitm2                                        |
| Btg1                  | FJ422280                                     |
| Btg2                  | FJ860513:AK166274:FJ744746:FJ860514:AK145081 |
| Btg3                  | Fkbp10                                       |
| Bub3                  | Fkbp11                                       |
| Bud13                 | Flg                                          |
| Bud31                 | Flg2                                         |
| Bves                  | Fli1                                         |
| Bxdc5:Rpf1            | Fln                                          |
| Bysl                  | Flt1                                         |
| Bzrap1                | Flt4                                         |
| Bzw1                  | Fmn1                                         |
| Bzw2                  | Fmnl3                                        |
| C030006K11Rik         | Fmo1                                         |
| C030019I05Rik         | Fmo3                                         |
| C030023E24Rik         | Fmo5                                         |
| C030030A07Rik         | Fmod                                         |
| C030034I22Rik         | Fmr1nb                                       |
| C030039L03Rik         | Fn3krp                                       |
| C030044B11Rik         | Fnd3c2                                       |
| C030046I01Rik         | Fndc7                                        |
| C030048B08Rik         | Fndc8                                        |
| C130022K22Rik         | Folh1                                        |
| C130026L21Rik         | Folr1                                        |
| C130036L24Rik         | Folr2                                        |
| C130039O16Rik         | Foxa3                                        |
| C130071C03Rik         | Foxd1                                        |

|                         |                     |
|-------------------------|---------------------|
| C1d                     | Foxf2               |
| C1galt1c1               | Foxi2               |
| C1qa                    | Foxj1               |
| C1qbp                   | Foxm1               |
| C1ql1                   | Foxn3:AK053772      |
| C1ql3                   | Foxo3               |
| C1qtnf2                 | Foxo4               |
| C1qtnf4                 | Foxp2               |
| C1qtnf6                 | Foxp3:4930524L23Rik |
| C230004F18Rik           | Foxq1               |
| C230052I12Rik           | Fpr2                |
| C230081A13Rik           | Frem1:qbrick        |
| C230091D08Rik           | Frem2               |
| C230096C10Rik           | Frk                 |
| C2cd2                   | Frmd6               |
| C2cd2l                  | Frmd8               |
| C2cd3                   | Frrs1               |
| C2cd4c                  | Fsbp:E130016E03Rik  |
| C330006K01Rik           | Fscb                |
| C330007P06Rik           | Fscn2               |
| C330018D20Rik           | Fsd2                |
| C330019G07Rik           | Fsip1               |
| C330021F23Rik           | Fut10               |
| C330021F23Rik           | Fut7                |
| C330027C09Rik:mKIAA1524 | Fuz                 |
| C430048L16Rik           | Fv1                 |
| C530008M17Rik           | Fzd2                |
| C530008M17Rik           | Fzd5                |
| C530028O21Rik           | Fzd6                |
| C630004H02Rik           | Fzd7                |
| C630043F03Rik:AK042990  | G0s2                |
| C77080                  | G6b                 |
| C77370                  | Gabbr2              |
| C78339                  | Gabpb2              |
| C80913                  | Gabra6              |
| C85492                  | Gabre               |
| C87436                  | Gabrr3              |
| C8a                     | Gadd45a             |
| C920009B18Rik           | Gadl1               |
| C920016K16Rik:Zfp952    | Gal                 |



|                 |                   |
|-----------------|-------------------|
| Cab39           | Gal3st4           |
| Cab39l          | Galnt12           |
| Cabin1          | Galnt5            |
| Cables1         | Galnt6            |
| Cables2         | Galnt12           |
| Cabp1:CABP1Lb   | Galnt15           |
| Cabyr           | Gapdh             |
| Cachd1          | Gapdh             |
| Cacna1a         | Gapdh             |
| Cacna1c         | Gapdhs            |
| cacna1d:Cacna1d | GARI:Fam71f2      |
| Cacna1g         | Gast              |
| Cacna1h         | Gata2             |
| Cacna1i         | Gata3             |
| Cacna2d1        | Gatsl3            |
| Cacna2d3        | Gbp2              |
| Cacnb1          | Gbp3              |
| Cacnb2          | Gbp4              |
| Cacnb3          | Gbp6              |
| Cacnb4          | Gbp9              |
| Cacng2          | Gcg               |
| Cacng3          | Gch1              |
| Cacng4          | Gck               |
| Cacng5          | Gcnt1             |
| Cacng8          | Gcnt4             |
| Cacybp          | Gcom1             |
| Cad             | Gdf11             |
| Cadm2           | Gdf15             |
| Cadm3           | Gdf9              |
| Cadm4           | Gdpd4             |
| Cadps           | Gem               |
| Cadps2:CAPS2a   | Gen1              |
| Calb1           | Gfap              |
| Calb2           | Gfra1:GDNFR-alpha |
| Calca           | Gfra4             |
| Calcoco1        | Gfral:Gral        |
| Cald1           | Ggt5              |
| Calhm2          | Ggta1             |
| Calm1           | Ghrh              |
| Calm2           | Ghsr              |

|                         |                       |
|-------------------------|-----------------------|
| Calm3                   | Gif                   |
| Caln1                   | Gimap3                |
| Calr                    | Gimap8:IAN9           |
| Calu                    | Gipc2:Semcap2         |
| Caly                    | Gjb2                  |
| Camk1                   | Gjb6                  |
| Camk1d                  | Gjc2                  |
| Camk1g                  | Gk5:AK090372          |
| Camk2b                  | Gkn1                  |
| Camk2d:mKIAA4163:Camk2g | Glb1l2                |
| Camk2g                  | Gldc                  |
| Camk2n1                 | Gldn                  |
| Camk2n2                 | Gli1                  |
| Camk4                   | Gli2                  |
| Camkk1                  | Gli3                  |
| Camkv                   | Glipr1                |
| Caml                    | Glipr2                |
| cAMP-GEFII:Rapgef4      | Glis1                 |
| Camsap1                 | Glis3                 |
| Camsap1l1               | Glod5                 |
| Camta1                  | Glp2r                 |
| Camta2                  | Glrp1                 |
| Cand1                   | Glt1d1                |
| Cand2                   | Glt28d2               |
| Cant1                   | Glt6d1                |
| Canx                    | Gltscr1               |
| Cap2                    | Glyatl3               |
| Capn10                  | Glycam1               |
| Capn12                  | Glyctk                |
| Capn2:calp80            | Gm10022:2210409E12Rik |
| Capn5                   | Gm10035               |
| Capn7                   | Gm10136               |
| Capns1                  | Gm10190               |
| Caprin1                 | Gm10248               |
| Caprin2                 | Gm10389               |
| Caps2                   | Gm10400               |
| Capsl                   | Gm10584               |
| Capza1                  | Gm106                 |
| Capza2                  | Gm10639               |
| Capzb                   | Gm10649               |

|                   |                    |
|-------------------|--------------------|
| Car10             | Gm10653            |
| Car11             | Gm1078             |
| Car12             | Gm10941            |
| Car15             | Gm11110            |
| Car2              | Gm11426            |
| Car5b             | Gm11428            |
| Car7              | Gm11435            |
| Car8              | Gm11562            |
| Carhsp1           | Gm11696            |
| Carkd             | Gm11992            |
| Cars              | Gm12034            |
| Cars2             | Gm12216            |
| Cartpt            | Gm12238            |
| Casc3             | Gm12250            |
| Casc4             | Gm12298            |
| Casd1             | Gm12695            |
| Cask              | Gm128              |
| Caskin1:mKIAA1306 | Gm12824            |
| Caskin2           | Gm12839            |
| Casp2             | Gm13051            |
| Casp3             | Gm13083            |
| Casp6             | Gm13103            |
| Casp7             | Gm13154            |
| Casp8             | Gm13154            |
| Casp8ap2          | Gm13178            |
| Casp9             | Gm136              |
| Casz1             | Gm13629            |
| Cat               | Gm13718            |
| Cav2              | Gm13939            |
| Cbara1            | Gm14005            |
| Cbfa2t2           | Gm14085            |
| Cbfa2t3           | Gm14090:D2ErtD750e |
| Cbfb              | Gm14160            |
| Cbl               | Gm14296            |
| Cblb              | Gm14391            |
| Cbln1             | Gm14435:Gm14288    |
| Cbln2             | Gm15319            |
| Cbln4             | Gm1564             |
| Cbr1              | Gm15645            |
| Cbr4              | Gm1574             |

|          |                                      |
|----------|--------------------------------------|
| Cbwd1    | Gm15800                              |
| Cbx1     | Gm1604b                              |
| Cbx2     | Gm16287                              |
| Cbx3     | Gm16378                              |
| Cbx4     | Gm16379                              |
| Cbx5     | Gm16386                              |
| Cbx7     | Gm16516                              |
| Cbx8     | Gm16532                              |
| Cby1     | Gm1661                               |
| Cby3     | Gm1966                               |
| Cc2d1a   | Gm1995                               |
| Cc2d1b   | Gm2012:Slx:Gm6121                    |
| Cc2d2a   | Gm2016                               |
| Ccar1    | Gm216                                |
| Ccbe1    | Gm2518                               |
| Ccbl1    | Gm266                                |
| Ccbl2    | 97:Gm10406:ENSMUSG00000079399:544988 |
| Ccdc101  | Gm3286                               |
| Ccdc103  | Gm3404                               |
| Ccdc104  | Gm3414                               |
| Ccdc106  | Gm3434                               |
| Ccdc107  | Gm3696                               |
| Ccdc109b | Gm3833                               |
| Ccdc111  | Gm4013                               |
| Ccdc112  | Gm4736:Gm8882:EG114600               |
| Ccdc115  | Gm4745                               |
| Ccdc116  | Gm4759                               |
| Ccdc117  | Gm4792                               |
| Ccdc12   | Gm4814                               |
| Ccdc120  | Gm4861                               |
| Ccdc123  | Gm4922                               |
| Ccdc124  | Gm4925                               |
| Ccdc125  | Gm4926                               |
| Ccdc127  | Gm4951                               |
| Ccdc13   | Gm4952                               |
| Ccdc130  | Gm4980                               |
| Ccdc132  | Gm4983                               |
| Ccdc134  | Gm4983                               |
| Ccdc136  | Gm505                                |
| Ccdc137  | Gm5087                               |

|                               |                 |
|-------------------------------|-----------------|
| Ccdc138                       | Gm5089:EG328479 |
| Ccdc14                        | Gm5095          |
| Ccdc148                       | Gm5126          |
| Ccdc15                        | Gm514           |
| Ccdc159                       | Gm5465          |
| Ccdc160                       | Gm5468          |
| Ccdc21                        | Gm5544          |
| Ccdc22                        | Gm5567          |
| Ccdc23                        | Gm5615          |
| Ccdc24                        | Gm5631          |
| Ccdc25                        | Gm572           |
| Ccdc28a                       | Gm5771          |
| Ccdc28b:AK031278              | Gm5878          |
| Ccdc3                         | Gm5901          |
| Ccdc30:1700041C02Rik:AK005616 | Gm5916          |
| Ccdc32                        | Gm595           |
| Ccdc34                        | Gm614           |
| Ccdc37                        | Gm6251          |
| Ccdc39                        | Gm6320          |
| Ccdc41                        | Gm648           |
| Ccdc43                        | Gm6525          |
| Ccdc45:BC058545               | Gm6614          |
| Ccdc46                        | Gm6654          |
| Ccdc47                        | Gm6676          |
| Ccdc48                        | Gm6724          |
| Ccdc50                        | Gm6762          |
| Ccdc51                        | Gm6787          |
| Ccdc52:Spice1                 | Gm6813          |
| Ccdc53                        | Gm6900          |
| Ccdc55                        | Gm6924          |
| Ccdc56                        | Gm6938          |
| Ccdc58                        | Gm70            |
| Ccdc59                        | Gm7056          |
| Ccdc6                         | Gm7337          |
| Ccdc61                        | Gm766           |
| Ccdc62                        | Gm8267          |
| Ccdc64                        | Gm8369          |
| Ccdc66                        | Gm8787          |
| Ccdc71                        | Gm884           |
| Ccdc72                        | Gm904           |

|               |                |
|---------------|----------------|
| Ccdc73        | Gm9079         |
| Ccdc74a       | Gm9159         |
| Ccdc75        | Gm9573         |
| Ccdc77        | Gm9696         |
| Ccdc80        | Gm973          |
| Ccdc82        | Gm9758:Speer4e |
| Ccdc84        | Gm9766         |
| Ccdc85a       | Gm98           |
| Ccdc85b       | Gm9871         |
| Ccdc86        | Gm9897         |
| Ccdc88a       | Gm9999         |
| Ccdc88c       | Gm98           |
| Ccdc9         | Gmnn           |
| Ccdc90a       | Gna12          |
| Ccdc90b       | Gna14          |
| Ccdc91        | Gna15          |
| Ccdc92        | Gng11          |
| Ccdc93        | Gng8           |
| Ccdc94        | Gngt1          |
| Ccdc97        | Gngt2          |
| Cck           | Gnmt           |
| Ccl17         | Gnpda1         |
| Ccl25:TECK    | Gnrh1          |
| Ccl28         | Golt1a:Kiss1   |
| Ccl3:AK137525 | Gp1ba          |
| Ccl7          | Gpam:mKIAA1560 |
| Ccm2:AK040177 | Gpat2          |
| Ccna1         | Gpbar1         |
| Ccna2         | Gpld1          |
| Ccnc          | Gpn2           |
| Ccnd1         | Gpnmb          |
| Ccnd2:CYL2    | Gpr110         |
| Ccndbp1       | Gpr115         |
| Ccne1         | Gpr120         |
| Ccne2         | Gpr126         |
| Ccnf          | Gpr133         |
| Ccng1         | Gpr141         |
| Ccng2         | Gpr143         |
| Ccnh          | Gpr149         |
| Ccni          | Gpr161         |

|               |                |
|---------------|----------------|
| Ccnj          | Gpr179         |
| Ccnjl         | Gpr3           |
| Ccnk          | Gpr34          |
| Ccnl1         | Gpr39          |
| Ccnl2         | Gpr62          |
| Ccnt1         | Gpr63          |
| Ccnt2         | Gpr65          |
| Ccny          | Gpr82          |
| Ccnyl1        | Gpr84          |
| Ccpg1         | Gpr97          |
| Ccrn4l        | Gprc5b         |
| Ccs           | Gprc5c         |
| Cct2          | Gprc5d         |
| Cct3          | Gprc6a         |
| Cct4          | Gpsm2          |
| Cct5          | Gpsm3          |
| Cct6a         | Gpx2-ps1       |
| Cct7:AK153821 | Gpx3           |
| Cct8          | Gramd1c        |
| Ccz1          | Gramd2         |
| Cd109         | Gramd3         |
| Cd151         | Grap           |
| Cd164         | Greb1:Kiaa0575 |
| Cd200         | Grem1          |
| Cd226:dnam-1  | Grhl2          |
| Cd244:2b4     | Grid2          |
| Cd24a         | Grik3          |
| Cd274         | Grin2c         |
| Cd276         | Grin3b         |
| Cd2ap:Mets1   | Grm8:Grm8A     |
| Cd2bp2        | Grpr           |
| Cd302         | Grrp1          |
| Cd320         | Gsbs           |
| Cd34          | Gsdma          |
| Cd38          | Gsdma2         |
| Cd3eap        | Gsdma3         |
| Cd44          | Gsdmd          |
| Cd47:AK018679 | Gsg1l          |
| Cd52          | Gsg2           |
| Cd53          | Gsta3          |

|                 |                |
|-----------------|----------------|
| Cd55            | Gstk1          |
| Cd59a           | Gstm2          |
| Cd63            | Gstm3          |
| Cd68            | Gsto2          |
| Cd81            | Gstt1          |
| Cd83            | Gstt2          |
| Cd93            | Gstt4          |
| Cd99l2          | Gsx2           |
| Cdadc1          | Gtf3c5         |
| Cdc123          | Gtse1          |
| Cdc14b          | Gtsf1          |
| Cdc16           | Guca1a         |
| Cdc23           | Gusb           |
| Cdc25a          | Gykl1          |
| Cdc25b          | Gypa           |
| Cdc25c          | Gypc           |
| Cdc26           | Gys2           |
| Cdc27           | H19:AK145379   |
| Cdc34           | H1f0:lcam1     |
| Cdc37           | H2-M3          |
| Cdc37l1         | H60c           |
| Cdc40           | Hao1           |
| Cdc42           | Hao2           |
| Cdc42bpa        | HaplN4         |
| Cdc42bpb        | Has1           |
| Cdc42ep1        | Has2           |
| Cdc42ep2        | Has2as         |
| Cdc42ep3        | Haus6          |
| Cdc42ep4        | Havcr2         |
| Cdc42se1        | Hdmcp:Slc25a47 |
| Cdc42se2        | Hdx            |
| Cdc5l:mKIAA0432 | Heatr2         |
| Cdc7            | Heca           |
| Cdc73           | Heg1           |
| Cdca4           | helB:Helb      |
| Cdca8           | Hells          |
| Cdh11           | Hemgn          |
| Cdh12           | Hepacam2       |
| Cdh13           | Heph           |
| Cdh15           | Heph11         |



|                   |                |
|-------------------|----------------|
| Cdh2              | Hes5           |
| Cdh20             | Hey2           |
| Cdh4              | Heyl           |
| Cdh8              | Hfe            |
| Cdh9              | Hgd            |
| Cdhr1             | Hhat           |
| Cdipt             | Hhatl          |
| Cdk10             | Hhex           |
| Cdk11b            | Hhip           |
| Cdk12:AK047916    | Hhipl2         |
| Cdk13             | Hhla1          |
| Cdk14             | Hide1:AB124611 |
| Cdk16             | Hinfp          |
| Cdk17             | Hipk2          |
| Cdk18             | Hist1h1e       |
| Cdk19:Cdk8        | Hist1h2ac      |
| Cdk20             | Hist1h2be      |
| Cdk2ap1           | Hist1h3d       |
| Cdk2ap2           | Hist1h4c       |
| Cdk4              | Hist1h4d       |
| Cdk5              | Hist1h4h       |
| Cdk5r1            | Hist2h2be      |
| Cdk5r2            | Hk3            |
| Cdk5rap1          | Hlcs           |
| Cdk5rap3:AK188991 | Hlx            |
| Cdk7              | Hmcn1          |
| Cdk8              | Hmga2          |
| Cdk9              | Hmgb1          |
| Cdkal1            | Hmgcs1         |
| Cdkl1             | Hmgcs1         |
| Cdkl2             | Hmha1          |
| Cdkl3             | Hmox1          |
| Cdkl4             | Hn1l           |
| Cdkl5             | Hnf4g          |
| Cdkn1a            | Hnrnp3         |
| Cdkn1b            | Hormad1        |
| Cdkn1c            | Hoxa1          |
| Cdkn2aip          | Hoxa4          |
| Cdkn2aipnl        | Hoxc10         |
| Cdo1              | Hoxc8          |

|                           |          |
|---------------------------|----------|
| Cdon                      | Hpgd     |
| Cdr1                      | Hpgds    |
| Cdr2l                     | Hpn      |
| Cds1                      | Hps6     |
| Cds2                      | Hpse     |
| Cdv3:AK048941             | Hpx      |
| Cdyl2                     | Hrasls5  |
| Cebpb                     | Hrh1     |
| Cebpd                     | Hrh2     |
| Cebpg                     | Hs1bp3   |
| Cebpz                     | Hs3st3a1 |
| Cecr6                     | Hs3st3b1 |
| Celf1                     | Hsbp1l1  |
| Celf2:Napor-1             | Hsd17b1  |
| Celf3                     | Hspa1a   |
| Celf4                     | Hspb1    |
| Celf5                     | Hspb6    |
| Celf6                     | Hspb8    |
| Celsr2                    | Htr1d    |
| Celsr3                    | Htr1f    |
| Cend1                     | Htr2a    |
| Cenpa:Cenp-a              | Htr2b    |
| Cenpb                     | Htr3a    |
| Cenpc1                    | Htr4     |
| Cenpe                     | Htr6     |
| Cenph                     | Htra3    |
| Cenpj                     | Hus1     |
| Cenpk:Solt                | Hyal1    |
| Cenpm                     | Hyal3    |
| Cenpo                     | Hydin    |
| Cenpp                     | Hyls1    |
| Cenpt                     | lbsp     |
| Cenpv                     | Icam4    |
| Cenpw                     | Icos     |
| Cep110:mFLJ00150          | Icosl    |
| Cep120                    | Ier3     |
| Cep135                    | Ifi202b  |
| Cep152:AK028650:mKIAA0912 | Ifi205   |
| Cep164:mKIAA1052          | Ifi47    |
| Cep170:mKIAA0470          | Ifih1    |

|                       |                        |
|-----------------------|------------------------|
| Cep192                | lfit1                  |
| Cep250                | lfitm1                 |
| Cep290                | lfitm3                 |
| Cep57:mKIAA0092       | lfitm6                 |
| Cep5711:2410017P07Rik | lfitm7                 |
| Cep63                 | lflt1                  |
| Cep68                 | lfngr1                 |
| Cep70                 | lfrg15                 |
| Cep72                 | lgf2                   |
| Cep78                 | lgf2bp2                |
| Cep97                 | lgf2bp3:AK045244:mimp3 |
| Cept1                 | lgfbp7                 |
| Cercam                | lgj                    |
| Cerk                  | lglon5                 |
| Ces7:AK006971         | lgsf11                 |
| Cetn2                 | lgsf6                  |
| Cetn3                 | lgsf9b                 |
| Cetn4                 | lgtp                   |
| Cfb                   | ligp1:ILGP             |
| Cfdp1                 | lkbip                  |
| Cfl1                  | lkzf1                  |
| Cfl2                  | ll11ra1                |
| Cflar                 | ll12a                  |
| Cfp                   | ll13ra1                |
| Cftr                  | ll15                   |
| Cggbp1                | ll15ra:IL15ra          |
| Cgn                   | ll17rc                 |
| Cgref1                | ll18rap                |
| Cgrrf1                | ll1a                   |
| Ch25h                 | ll1f10                 |
| Chac1                 | ll1f5                  |
| Chac2                 | ll1f8                  |
| Chadl                 | ll1r1                  |
| Chaf1a                | ll1r2                  |
| Chchd1                | ll1r11                 |
| Chchd10               | ll2                    |
| Chchd2                | ll20rb                 |
| Chchd3                | ll21                   |
| Chchd4                | ll21r                  |
| Chchd6                | ll22ra1                |

|                            |                |
|----------------------------|----------------|
| Chchd7                     | Il23r          |
| Chchd8:AK171117            | Il2rg          |
| Chd1                       | Il4ra          |
| Chd1l                      | Il7r           |
| Chd2                       | Impa2          |
| Chd3                       | Inca1          |
| Chd4:mKIAA4075             | Inpp5d:Ship    |
| Chd5:mKIAA0444             | Inpp1          |
| Chd6:AK038115:mKIAA1335    | Insc           |
| Chd8                       | Insl5          |
| Chd9:mKIAA0308             | Insm2          |
| Cherp                      | Insrr          |
| Chfr                       | Ints7          |
| Chga                       | lpo7           |
| Chgb                       | lpp            |
| Chi3l1                     | lqca           |
| Chic1                      | lqcd           |
| Chic2                      | lqcf5          |
| Chid1                      | lqch           |
| Chka                       | lqck           |
| Chkb                       | lqgap3         |
| Chl1                       | Irak3:Irak-M   |
| Chm                        | Irak4          |
| Chml                       | lrf1           |
| Chmp1a                     | lrf4           |
| Chmp1b                     | lrf5           |
| Chmp2a                     | lrf6           |
| Chmp2b                     | lrf8           |
| Chmp4b                     | lrg1           |
| Chmp5                      | lrgm1          |
| Chmp6                      | lrgm2          |
| Chmp7                      | lrx3           |
| Chn1                       | Isl1:isl1-beta |
| Chn2                       | Islr           |
| Chodl                      | ltga1          |
| Chordc1                    | ltga2          |
| Chpf                       | ltga9          |
| Chpf2:2010209O12Rik:Mir671 | ltgad          |
| Chpt1                      | ltgae          |
| Chrac1                     | ltgam          |

|               |                 |
|---------------|-----------------|
| Chrd          | Itgb2           |
| Chrm1         | Itgb3bp         |
| Chrm3         | Itgb5           |
| Chrm4         | Itgb7           |
| Chrna1        | Itgb8           |
| Chrna3        | Itih2           |
| Chrna4        | Itih4           |
| Chrna5        | Itpkc           |
| Chrna7        | Itpr3           |
| Chrn2         | Itprp           |
| Chst1         | Itprpl2         |
| Chst10        | lyd             |
| Chst11        | Jag2            |
| Chst12        | Jak3:Ins13      |
| Chst15        | Jam2            |
| Chst2         | Jmy:Jmy-pending |
| Chst5         | Jsrp1           |
| Chst8         | Jub             |
| Chsy1         | Kank1           |
| Chsy3         | Kank2           |
| Chuk          | Kazald1         |
| Churc1        | Kcna2           |
| Ciao1         | Kcne11          |
| Ciapin1       | Kcng1           |
| Cib1          | Kcng3           |
| Cib2          | Kcng4           |
| Cic:mKIAA0306 | Kcnh8           |
| Cidea         | Kcnh8           |
| Cinp          | Kcnj12          |
| cip7          | Kcnj13          |
| Cir1          | Kcnj16          |
| Cirbp         | Kcnj3           |
| Cirh1a        | Kcnj8           |
| Cisd1         | Kcnk13          |
| Cisd2         | Kcnk6           |
| Cisd3         | Kcnmb3          |
| Cish          | Kcnn4           |
| Cit           | Kcnrg           |
| Cited2        | Kctd11          |
| Ciz1          | Kctd14          |

|                     |                                                     |
|---------------------|-----------------------------------------------------|
| Ckap2l              | Kctd16:mKIAA1317                                    |
| Ckap4               | Kctd21                                              |
| Ckb                 | Kdelr3                                              |
| Ckif:AK042831:CKLF6 | Kdr                                                 |
| Ckm                 | Kel                                                 |
| Ckmt1               | Kera                                                |
| Cks1b               | Khdc1b                                              |
| Clasp1              | Khk                                                 |
| Clasp2              | Kif11                                               |
| Clca1:Clca2:mCLCA1  | Kif13b:mKIAA0639                                    |
| Clcc1               | Kif15                                               |
| Clcn2               | Kif18a                                              |
| Clcn3:CLCN3         | Kif18b                                              |
| Clcn4-2             | Kif23                                               |
| Clcn7               | Kif26a:BC115444                                     |
| Cldn12              | Kif26b                                              |
| Cldn2               | Kif2c                                               |
| Cldnd1              | Kif4                                                |
| Clec11a             | Kif7                                                |
| Clec16a:mKIAA0350   | Kifc1                                               |
| Clec2l              | Kifc1:Kifc5b                                        |
| Clgn                | Kirrel2                                             |
| Clic4               | Kiss1r                                              |
| Clint1              | Klf1                                                |
| Clip1:AK140543      | Klf15                                               |
| Clip2               | Klhl11                                              |
| Clip3               | Klhl15                                              |
| Clip4               | Klhl28                                              |
| Clk1                | Klhl34                                              |
| Clk2:Scamp3         | Klhl4                                               |
| Clk3                | Klhl6                                               |
| Clk4                | Klk10                                               |
| Clmn:mKIAA1188      | Klk11                                               |
| Cln3                | Klk1b27                                             |
| Cln8                | Klk1b3                                              |
| Clns1a              | Klk1b7-ps                                           |
| Clock               | Klk1b9                                              |
| Clp1                | Klk9                                                |
| Clpb                | Ly-49W:Klra4:Klra12:Klra23:Klra16:Klra1:Ly49G:Ly49A |
| Clpp                | Klra2                                               |

|                 |                                               |
|-----------------|-----------------------------------------------|
| Clptm1          | :CH29-493D4.3:Klra8:Klra9:Klra14:Klra10:Klra3 |
| Clptm1l         | Klrb1f                                        |
| Clpx            | Klrc3                                         |
| Clrn1           | Klrg2                                         |
| Clstn1          | Klri2                                         |
| Clstn2          | Klrk1                                         |
| Clstn3:AK213543 | Kntc1                                         |
| Clta            | Krcc1                                         |
| Cltb            | kremen                                        |
| Cltc:AK049578   | Kri1                                          |
| Clu             | Krt1                                          |
| Cluap1          | Krt26                                         |
| Clvs2           | Krt33a                                        |
| Clybl           | Krtcap3                                       |
| Cmas            | Ksr2                                          |
| Cmb1            | Ky                                            |
| Cmc1            | Kynu                                          |
| Cml1            | L1td1                                         |
| Cmpk1           | Lama1                                         |
| Cmpk2           | Lama3                                         |
| Cmtm3           | Lama4                                         |
| Cmtm5           | Lama5                                         |
| Cmtm6           | Lamb2                                         |
| Cmya5           | Lamb3:AK005414                                |
| Cnbp            | Lamc3                                         |
| Cndp2           | Lass3                                         |
| Cnga2           | Lat                                           |
| Cnga4           | Lax1                                          |
| Cnih            | Lbp                                           |
| Cnih2           | Lbr                                           |
| Cnih3           | Lca5l                                         |
| Cnih4           | Lcat                                          |
| Cnksr2          | Lcn2                                          |
| Cnn2            | Ldhd                                          |
| Cnn3            | Ldlrad2                                       |
| Cnnm1           | Ldlrad3                                       |
| Cnnm2           | Ldlrap1                                       |
| Cnnm3:Acdp3     | Lect1                                         |
| Cnnm4           | Lef1                                          |
| Cno             | Lemd1                                         |

|                |                                                |
|----------------|------------------------------------------------|
| Cnot1          | Lepr                                           |
| Cnot10         | Leprel1                                        |
| Cnot2          | Lfng                                           |
| Cnot3:AK031165 | Lgals1                                         |
| Cnot4          | Lgals3                                         |
| Cnot6:BC079836 | Lgals4                                         |
| Cnot6l         | Lgals8                                         |
| Cnot7          | Lgals9                                         |
| Cnot8          | Lgi4                                           |
| Cnp            | Lhcgr                                          |
| Cnpy2          | Lhfp11                                         |
| Cnpy3          | Lhx1                                           |
| Cnpy4          | Lhx8                                           |
| Cnr1           | Lif                                            |
| Cnrip1         | Lilra5                                         |
| Cnst           | :Pira1:Pira2:Pira7:Gm14548:Pira4:Pira11:Lilra6 |
| Cntd1          | Lilrb4                                         |
| Cntfr          | Lilrb4:Gp49a                                   |
| Cntn1          | Lima1                                          |
| Cntn2          | Lims2                                          |
| Cntn3          | Lin28a                                         |
| Cntn4          | Lin28b                                         |
| Cntn5          | Lin28b                                         |
| Cntn6          | Lin9:Bara                                      |
| Cntnap1        | Lingo4                                         |
| Cntnap2        | Lipf                                           |
| Cntnap4        | Lipi                                           |
| Cntnap5b       | Lipk                                           |
| Cntnap5c       | Lipm                                           |
| Cntrob         | Lmbrd2                                         |
| Coasy          | Lmcd1                                          |
| Cobl           | Lmln                                           |
| Cobra1         | Lmod1                                          |
| Coch           | Lmx1a                                          |
| Cog1:LDLB      | Lnx2                                           |
| Cog2           | LOC100045653                                   |
| Cog3           | LOC100134990                                   |
| Cog4           | LOC100233207                                   |
| Cog5           | LOC100270707                                   |
| Cog6           | LOC100271928                                   |



|                  |                 |
|------------------|-----------------|
| Cog7             | LOC100302626    |
| Cog8             | LOC100302688    |
| Coil             | LOC100499420    |
| Col11a1          | LOC100503704    |
| Col12a1          | LOC545947       |
| Col15a1          | LOC668917       |
| Col1a2           | Lonrf3          |
| Col20a1:AK030308 | Lox             |
| Col23a1          | Loxhd1          |
| Col25a1:AK015682 | Loxl1           |
| Col2a1           | Lpar1           |
| Col3a1           | Lpo             |
| Col4a1           | Lpxn            |
| Col4a2           | Lrd:Dnahc11     |
| Col4a3bp         | Lrdd            |
| Col4a6           | Lrguk           |
| Col5a1:BC152372  | Lrig3           |
| Col5a2           | Lrp2            |
| Col6a1           | Lrp2bp          |
| Col6a2           | Lrrc1           |
| Col9a3           | Lrrc14b         |
| Commd1           | Lrrc15          |
| Commd10          | Lrrc17          |
| Commd2           | Lrrc19          |
| Commd3           | Lrrc2           |
| Commd4           | Lrrc23          |
| Commd5           | Lrrc26          |
| Commd6           | Lrrc31:AK085279 |
| Commd7           | Lrrc32          |
| Commd8           | Lrrc34          |
| Commd9           | Lrrc36          |
| Comt             | Lrrc43          |
| Comtd1           | Lrrc46          |
| Copa             | Lrrc48          |
| Copb1            | Lrrc6           |
| Copb2            | Lrrc66          |
| Cope1:Cope       | Lrrc8b          |
| Copg             | Lrrc8c          |
| Copg2            | Lrrc9           |
| Cops2            | Lrriq1          |

|                     |                 |
|---------------------|-----------------|
| Cops3               | Lrrk1:mKIAA1790 |
| Cops4               | Lrtm2           |
| Cops5               | Lsp1            |
| Cops6               | Ltbp1           |
| Cops7a              | Ltbr            |
| Cops7b              | Ltc4s           |
| Cops8               | Lum             |
| Copz1               | Ly6c1           |
| Coq10a              | Ly6g6d          |
| Coq10b              | Ly75            |
| Coq2                | Lyn             |
| Coq3                | Lypd4           |
| Coq4                | Lyve1           |
| Coq5                | Lyz1            |
| Coq6                | Lyz2            |
| Coq7:clk-1          | Lyzl4           |
| Coq9                | Lzts1           |
| Coro1a              | Mab21l1         |
| Coro1b:AK185771     | Mab21l2         |
| Coro1c              | Macrod1         |
| Coro2a              | Macrod2         |
| Coro2b              | Maff            |
| Coro7               | Mal             |
| Cort                | Mamdc2          |
| Cotl1               | Mamdc4          |
| Cox10               | Maml1           |
| Cox11               | Maml3           |
| Cox15               | Maml1d1         |
| Cox16:Synj2bp:Arip2 | Map3k11         |
| Cox17               | Map3k14         |
| Cox18               | Map3k8:cot      |
| Cox19               | Mapk12          |
| Cox2                | Mapkapk3        |
| Cox4i1              | Mark4:mKIAA1860 |
| Cox4nb:COX4AL       | Marveld1        |
| Cox5a               | Marveld2        |
| Cox5b               | Mastl           |
| Cox6a1              | Mat1a           |
| Cox6a2              | Matn3           |
| Cox6b1              | Mavs            |

|             |                          |
|-------------|--------------------------|
| Cox6c       | Mbd3l1                   |
| Cox7a1      | Mbnl3                    |
| Cox7a2      | Mca32:Gm885:Allergin-1   |
| Cox7a2l     | Mcam                     |
| Cox7b       | Mcm10                    |
| Cox7b2      | Mcm5                     |
| Cox7c       | Mcm8                     |
| Cox8a       | Mcm9                     |
| Cpd         | Mcoln2                   |
| Cpe         | Mcph1                    |
| Cpeb1       | Mctp2                    |
| Cpeb2       | Mdh1b                    |
| Cpeb3       | Med12                    |
| Cpeb4       | Megf6                    |
| Cplx1       | Mei4                     |
| Cplx2       | Meox1                    |
| Cplx3       | Mertk                    |
| Cpm         | Mesp1                    |
| Cpne1:Rbm12 | Metrn                    |
| Cpne2       | Mettl4                   |
| Cpne3       | Mettl7a2:AB099516:Higd1c |
| Cpne4       | Mfap1b                   |
| Cpne5       | mFLJ00017:Cyth4          |
| Cpne6       | mFLJ00294:Rab11fip1      |
| Cpne7       | Mfng                     |
| Cpne8       | Mfsd2b                   |
| Cpox        | Mfsd7c                   |
| Cpped1      | Mgam                     |
| Cpsf1       | MGC107098                |
| Cpsf2       | Mgmt                     |
| Cpsf3       | Mgp                      |
| Cpsf3l      | Mgst1                    |
| Cpsf4       | Micalcl                  |
| Cpsf6       | Mipol1                   |
| Cpsf7       | Mir17hg                  |
| Cpt1a       | Mir186                   |
| Cpt1c       | Mir191                   |
| Cpxm1       | Mir1949                  |
| Crabp1      | Mir1983                  |
| Cradd       | Mir206                   |

|                 |                  |
|-----------------|------------------|
| Cramp11         | Mir218-1         |
| Crat            | Mir3064          |
| Crb2            | Mir341           |
| Crbn            | Mir568           |
| Crcp            | Mir666           |
| Creb1           | Mir672           |
| Creb3           | Mir684-1         |
| Creb3l1         | Mir688           |
| Crebbp          | Mir692-1         |
| Crebzf:BC051589 | Mirlet7d         |
| Creg1           | Mitf             |
| Creg2           | mKIAA0074:Ncaph  |
| CrelD1          | mKIAA0135:Pask   |
| CrelD2          | mKIAA0452:Ttc39a |
| Crem            | Mks1             |
| Crh             | Mkx              |
| Crhbp           | Mlana            |
| Crhr1           | Mlycd            |
| Crim1           | Mlyk:Myk         |
| Crip2           | Mmel1:NI1        |
| Cript           | Mmp10            |
| Crispld2        | Mmp11            |
| Crk             | Mmp12            |
| Crlf1:CRLM3     | Mmp13            |
| Crlf2           | Mmp19            |
| Crlf3:Cytor4    | Mmp23            |
| Crls1           | Mmp7             |
| Crmp1           | Mmp8             |
| Crnk1           | Mmp9             |
| Crocc           | Mobkl2c          |
| Crot            | Mocos            |
| Crry:Cr1l       | Mocs1            |
| Crtac1          | Mogat1           |
| Crtc1           | Morc2b           |
| Crtc2           | Morn3            |
| Crtc3           | Morn5            |
| Crtr-1:Tcfcp2l1 | Mos              |
| Cry1            | Mospd3           |
| Cry2:mPHLL2     | Moxd1            |
| Cryaa           | Mpa2l:Gbp10:Gbp6 |

|                 |                       |
|-----------------|-----------------------|
| Cryab           | Mpl                   |
| Crybg3          | Mpz                   |
| Cryl1           | Mpzl2                 |
| Crym            | Mr1                   |
| Cryz            | Mrap2                 |
| Cryzl1          | Mrc2                  |
| Cs              | Mreg                  |
| Csad            | Mrgprb1               |
| Csda            | Mrgprx2               |
| Csdc2           | Mrpl33                |
| Csde1:mKIAA0885 | Mrps34                |
| Cse1l           | Ms4a3                 |
| Csf1r           | Ms4a4c                |
| Csf2ra          | Ms4a4d                |
| Csf2rb          | Ms4a6b                |
| Csgalnact1      | Ms4a6c                |
| Csgalnact2      | Ms4a6d                |
| Csk             | Ms4a7                 |
| Csmd1           | Msi1                  |
| Csmd3           | Msln                  |
| Csnk1a1         | Msr1                  |
| Csnk1d          | Mstn                  |
| Csnk1e          | Msx1                  |
| Csnk1g1         | Msx2                  |
| Csnk1g2         | Mtap7d3               |
| Csnk1g3         | Mtbp                  |
| Csnk2a1         | Mtl5                  |
| Csnk2a2         | Mtmr11                |
| Csnk2b          | Mtnr1a                |
| Cspg4           | Mtr                   |
| Cspg5           | Mtrnr2l               |
| Cspp1           | Mttp                  |
| Csrnp2          | Muc15                 |
| Csrnp3          | Muc16                 |
| Csrp2           | Muc19:Muc19/Smgc:Smgc |
| Csrp2bp         | Muc2                  |
| Cst3            | Muc4                  |
| Cstb            | Muc1                  |
| Cstf1           | Mug1                  |
| Cstf2:Mir3112   | MUG3                  |

|                    |                     |
|--------------------|---------------------|
| Cstf2t             | Mum111              |
| Cstf3              | Mup5                |
| Ctage5             | Murc                |
| Ctbp1              | Mustn1              |
| Ctbp2              | Mx1                 |
| Ctbs               | Mx2                 |
| Ctc1:1500010J02Rik | Mxd3                |
| Ctcf               | Myb                 |
| Ctcf1              | Mybl1               |
| Ctdnep1            | Mybl2               |
| Ctdp1              | Mybpc1              |
| Ctdsp2:Mir546      | Mybpc3              |
| Ctdspl             | Mycbpap             |
| Ctdspl2            | Myct1               |
| Ctgf               | Myd88               |
| Cthrc1             | Myh1                |
| Ctla2a             | Myh11:mKIAA0866     |
| Ctnna1:AK008288    | Myh14               |
| Ctnna2             | Myh15               |
| Ctnnal1:ACRP       | Myh4                |
| Ctnnb1             | Myh7b               |
| Ctnnbip1           | Myh8:Myh2:mKIAA4211 |
| Ctnnbl1            | Myl9                |
| Ctnnd1             | Mylk3               |
| Ctnnd2             | myo 10:Myo10        |
| Ctns               | Myo1d               |
| Ctps               | Myo1e               |
| Ctps2              | Myo1f               |
| Ctr9               | Myo1g               |
| Ctrl               | Myo3a               |
| Ctsa               | Myo3b               |
| Ctsb               | Myo5c               |
| Ctsd               | Myod1               |
| Ctsf               | Myog                |
| Ctsk               | Myoz2               |
| Ctsl               | NAAA:Naaa           |
| Ctso               | Naalad2             |
| Ctss               | Naaladl2            |
| Ctsz               | Nadsyn1             |
| Cttn               | Nagpa               |

|                    |                         |
|--------------------|-------------------------|
| Cttnbp2            | Naip2                   |
| Cttnbp2nl          | Naip5                   |
| Ctu1               | Naip6:Naip7             |
| Ctu2:2310061F22Rik | Naprt1                  |
| Ctxn1              | Napsa                   |
| Ctxn2              | Narg2                   |
| Ctxn3              | Nat2                    |
| Cuedc1             | Nbn                     |
| Cuedc2             | Ncf1                    |
| Cul1               | Ncf2                    |
| Cul2               | Ncf4                    |
| Cul3               | Ndc80                   |
| Cul4a              | Nde1                    |
| Cul4b              | Ndp                     |
| Cul5               | Neat1:AK148054:AK197973 |
| Cul7:mKIAA0076     | Neb                     |
| Cul9               | Nebi                    |
| Cuta               | Nebi:AK163016           |
| Cutc               | Nedd1                   |
| Cux1               | Neil3                   |
| Cux2               | Nek1                    |
| Cwc15              | Nek11                   |
| Cwc22:AK039942     | Nek2:nek2               |
| Cwc25              | Nek5                    |
| Cwc27:AK030777     | Nek8                    |
| Cwf1911            | Neu2                    |
| Cwf1912            | Neu3                    |
| Cwh43              | Neur12                  |
| Cx3cl1             | Neur13                  |
| Cx3cr1             | Neurog2                 |
| Cxadr              | Neurog3                 |
| Cxcl12             | Nfatc1                  |
| Cxcl14:Bmac        | Nfatc4                  |
| Cxcl16             | Nfe2l2                  |
| Cxcl5              | Nfkbie                  |
| Cxcr5              | Ngf                     |
| Cxx1a              | Nhedc2                  |
| Cxx1b              | Nhlh2                   |
| Cxx1c              | Nhlrc3                  |
| Cxxc1              | Nhs                     |

|                |               |
|----------------|---------------|
| Cxxc4          | Nid1          |
| Cxxc5          | Nkiras2       |
| Cyb5           | Nkx2-2        |
| Cyb561         | Nkx2-5        |
| Cyb561d1       | Nlrc4         |
| Cyb561d2       | Nlrc5         |
| Cyb5b          | Nlrp14        |
| Cyb5d2         | Nlrp1b        |
| Cyb5r1         | Nlrp1c        |
| Cyb5r3         | Nlrp2         |
| Cyb5r4         | Nlrp4g        |
| Cyba           | Nlrp9a        |
| Cybasc3        | Nmur2         |
| Cyc1           | Nnat          |
| Cycs           | Nostrin       |
| Cyfp1:Shyc     | Notch1:notch1 |
| Cyfp2          | Notch3        |
| Cygb           | Notch4:IAP    |
| Cyhr1          | Nox4:Kox-1    |
| Cyld           | Npc111        |
| Cyp26b1        | Npep1         |
| Cyp2d22        | Npffr1        |
| Cyp2j6         | Npl           |
| Cyp2s1         | Npnt          |
| Cyp2u1         | Npsr1         |
| Cyp46a1        | Nr1h3         |
| Cyp51          | Nr1h5         |
| Cyp7b1         | Nrap          |
| Cyr61          | Nrg4          |
| Cys1           | Nrip2         |
| Cytb           | Nrk:NRK       |
| Cyth1:CLM1-A   | Nsun3         |
| Cyth2:AB013468 | Nt5c1b        |
| Cyth3          | Nt5dc2        |
| D030016E14Rik  | Ntf5          |
| D030028A08Rik  | Ntn1          |
| D030047H15Rik  | Ntn4          |
| D030056L22Rik  | Nuak2         |
| D0H4S114       | Nudt15        |
| D10Jhu81e      | Nudt5         |



|                         |             |
|-------------------------|-------------|
| D10Wsu102e              | Nudt7       |
| D10Wsu52e               | Nuf2        |
| D11Wsu47e               | Numb        |
| D11Wsu99e               | Nup210l     |
| D130017N08Rik:AK005905  | Nup62cl     |
| D130043K22Rik:mKIAA0319 | Nupl2       |
| D14Abb1e                | Nupr1       |
| D15Ert621e              | Nwd1        |
| D16Ert472e              | Nxf3        |
| D16H22S680E             | Nxnl1       |
| D17H6S56E-5:AK088743    | Nxph2       |
| D17Wsu104e              | Nyx         |
| D17Wsu92e               | Oaf         |
| D18Ert653e              | Oas1d       |
| D19Bwg1357e:mKIAA0020   | Oas1g       |
| D19Ert386e              | Oas1h       |
| D19Ert652e              | Oas2        |
| D19Ert737e              | Oasl2       |
| D1Bwg0212e              | Oaz3        |
| D1Ert622e               | Oc90        |
| D230025D16Rik           | Ocln        |
| D230037D09Rik           | Odam        |
| D2hgdh                  | Odf2l       |
| D2Wsu81e                | Odf3b       |
| D330028D13Rik           | Ofcc1       |
| D3Ert254e               | Ogn         |
| D3Ert751e               | Oip5        |
| D430019H16Rik:BC078436  | Olfml1      |
| D430041D05Rik           | Olfml3      |
| D430042O09Rik           | Olfr1033    |
| D4Bwg0951e              | Olfr1034    |
| D4Ert22e                | Olfr1085    |
| D4Wsu53e                | Olfr1089    |
| D5Ert579e               | Olfr1104    |
| D630023F18Rik           | Olfr1116-ps |
| D630037F22Rik           | Olfr1118-ps |
| D630039A03Rik           | Olfr1136    |
| D6Wsu116e               | Olfr1137    |
| D6Wsu163e               | Olfr1143    |
| D730040F13Rik           | Olfr1158    |

|                         |                 |
|-------------------------|-----------------|
| D7Ert715e               | Olfr1163        |
| D830030K20Rik:BC096416  | Olfr1184        |
| D830031N03Rik           | Olfr1188        |
| D8Ert738e               | Olfr1197        |
| D8Ert82e                | Olfr120         |
| D930015E06Rik:mKIAA0922 | Olfr1200        |
| D930016D06Rik           | Olfr1204        |
| D9Ert402e               | Olfr1206        |
| Daam1:mKIAA0666         | Olfr1238        |
| Dab1                    | Olfr1246        |
| Dab2                    | Olfr1254        |
| Dab2ip                  | Olfr1256        |
| Dact1                   | Olfr1257        |
| Dact2                   | Olfr1281        |
| Dact3                   | Olfr1284        |
| Dad1                    | Olfr1289        |
| Dag1                    | Olfr1310        |
| Dagla                   | Olfr1350        |
| Daglb                   | Olfr1353        |
| Dak                     | Olfr1356        |
| Dalrd3                  | Olfr137         |
| Dand5:SP1               | Olfr1383        |
| Dap                     | Olfr1385        |
| Dap3                    | Olfr1396        |
| Dapk1                   | Olfr1423        |
| Dapk3                   | Olfr1443        |
| Dapp1                   | Olfr1446        |
| Darc                    | Olfr1448        |
| Dars                    | Olfr1450        |
| Dars2                   | Olfr1459        |
| Daxx                    | Olfr1461        |
| Dazap1                  | Olfr1463        |
| Dazap2                  | Olfr150         |
| Dbc1                    | Olfr1500        |
| Dbi                     | Olfr173         |
| Dbn1                    | Olfr183         |
| Dbnnd1                  | Olfr191         |
| Dbnnd2                  | Olfr201         |
| Dbnl                    | Olfr221         |
| Dbp                     | Olfr288:Olfr287 |

|                 |         |
|-----------------|---------|
| Dbpht2          | Olfr292 |
| Dbr1            | Olfr31  |
| Dbt             | Olfr32  |
| Dcaf10:Wdr32    | Olfr352 |
| Dcaf11          | Olfr376 |
| Dcaf12          | Olfr421 |
| Dcaf12l1        | Olfr427 |
| Dcaf13          | Olfr434 |
| Dcaf15          | Olfr446 |
| Dcaf17          | Olfr456 |
| Dcaf4           | Olfr466 |
| Dcaf5           | Olfr486 |
| Dcaf6           | Olfr487 |
| Dcaf7           | Olfr490 |
| Dcaf8:Wdr42a    | Olfr494 |
| Dcakd           | Olfr497 |
| Dcbld1          | Olfr535 |
| Dcbld2          | Olfr543 |
| Dcc             | Olfr552 |
| Dcdc2a          | Olfr592 |
| Dcdc2b          | Olfr652 |
| Dchs1           | Olfr659 |
| Dci             | Olfr670 |
| Dck             | Olfr701 |
| Dclk1:mKIAA0369 | Olfr702 |
| Dclk2           | Olfr731 |
| Dclk3           | Olfr738 |
| Dclre1a         | Olfr748 |
| Dclre1b         | Olfr769 |
| Dclre1c         | Olfr77  |
| Dcn             | Olfr775 |
| Dcp1b           | Olfr78  |
| Dcp2            | Olfr784 |
| Dcps            | Olfr801 |
| Dctn1           | Olfr802 |
| Dctn2           | Olfr806 |
| Dctn3           | Olfr810 |
| Dctn4           | Olfr812 |
| Dctn6           | Olfr835 |
| Dctpp1          | Olfr860 |

|              |                    |
|--------------|--------------------|
| Dcun1d1      | Olfr866            |
| Dcun1d2      | Olfr869            |
| Dcun1d3      | Olfr872            |
| Dcun1d4      | Olfr876            |
| Dcun1d5      | Olfr877            |
| Dcx          | Olfr889            |
| Dda1         | Olfr911-ps1        |
| Ddah1        | Olfr920            |
| Ddah2        | Olfr924            |
| Ddb1         | Olfr936            |
| Dhd1         | Olfr947-ps1        |
| Dhd2         | Olfr95             |
| Ddit3        | Olfr951            |
| Ddit4        | Olfr972            |
| Ddit4l       | Olfr975            |
| DDM36:Igdcc4 | Olfr98             |
| Ddn          | Olig2              |
| Ddost        | Olig3              |
| Ddrgk1       | Olr1               |
| Ddt          | Omd                |
| Ddx1         | Omp                |
| Ddx10        | Onecut1            |
| Ddx17        | Onecut1            |
| Ddx18        | Onecut3            |
| Ddx19a       | Oplah              |
| Ddx19b       | Opn1mw             |
| Ddx20        | Opn1sw             |
| Ddx21        | Oprd1              |
| Ddx23        | Oprm1:MOR          |
| Ddx24        | Optc               |
| Ddx25        | Orc1l:Orc1         |
| Ddx26b       | Oscar              |
| Ddx27        | Osm                |
| Ddx28        | Osmr               |
| Ddx31        | Otc                |
| Ddx39        | Otof               |
| Ddx3x        | Otop1              |
| DDM3x:Ddx3y  | OTTMUSG00000022819 |
| Ddx41        | Otud3              |
| Ddx42        | Otx1               |

|                          |                       |
|--------------------------|-----------------------|
| Ddx46                    | Otx2                  |
| Ddx47                    | Ovol2                 |
| Ddx5                     | Oxgr1                 |
| Ddx50                    | Oxsm                  |
| Ddx51                    | Oxtr                  |
| Ddx52                    | P2rx3                 |
| Ddx54                    | P2rx5                 |
| Ddx55                    | P2rx6:mP2XM           |
| Ddx56                    | P2rx7                 |
| Ddx58                    | P2ry1                 |
| Ddx59                    | P2ry12                |
| Ddx6                     | P2ry6:AK008496        |
| Deaf1                    | Pabpc1l:1810053B01Rik |
| Deb1                     | Pabpc4l               |
| Decr2                    | Pabpc5                |
| Dedd                     | Pacrgl                |
| Def6                     | Padi2                 |
| Def8                     | Palb2                 |
| Defb26                   | Pappa                 |
| Degs1                    | Pappa2                |
| Degs2                    | Papss2                |
| Dek                      | Pard6b                |
| Dem1                     | Parp10:Plec1          |
| Dennd1a                  | Parp14                |
| Dennd1b                  | Parp3:Adprt3          |
| Dennd2a                  | Parp4                 |
| Dennd3:mKIAA0870         | Parp9                 |
| Dennd4a                  | Parvb                 |
| Dennd4b                  | Pate2                 |
| Dennd4c                  | Pate4                 |
| Dennd5a:ORF37            | Pawr                  |
| Dennd5b                  | Pax1:AK041531         |
| Denr                     | Pax6:AK080416         |
| Depdc5                   | Pbk                   |
| Depdc7                   | Pcdh1                 |
| Deptor:AK171902:AK164741 | Pcdh11x:PCDHX         |
| Dera                     | Pcdhb21               |
| Derl1                    | Pcdhb22               |
| Derl2                    | Pcolce                |
| Derp6:Rai12              | Pcp4l1                |

|                |                 |
|----------------|-----------------|
| Dexi           | Pcsk6           |
| Dffa           | Pdc             |
| Dffb           | Pde3a           |
| Dfna5          | Pde4c           |
| Dgat:Dgat1     | Pde5a           |
| Dgat2          | Pde6c           |
| Dgcr14         | Pde6h           |
| Dgcr2          | Pde7b           |
| Dgcr6          | Pdgfd           |
| Dgcr8:Mir1306  | Pdgfra          |
| Dgka           | Pdgfrb          |
| Dgkb           | Pdgfrl          |
| Dgkd:mKIAA0145 | Pdia4           |
| Dgke           | Pdilt           |
| Dgkg           | Pdk2            |
| Dgkh           | Pdk4            |
| Dgki:AK082250  | Pdlim2          |
| Dgkz           | Pdlim3          |
| Dguok          | Pdlim4          |
| Dhcr24         | Pdxk-ps         |
| Dhcr7          | Pdyn            |
| Dhdds          | Pdzd3           |
| Dhodh          | Pebp4           |
| Dhps           | Pecam1          |
| Dhrs1          | Peg10           |
| Dhrs13         | Peg12           |
| Dhrs4          | Peli2           |
| Dhrs7          | Pex11a          |
| Dhrs7b         | Pf4             |
| Dhrsx          | Pgam2           |
| Dhx15:mDEAH9   | Pgap1           |
| Dhx16          | Pgcp:HLS2       |
| Dhx29:AK164583 | Pglyrp3         |
| Dhx30:HELG     | Pgr15l          |
| Dhx32          | Phactr4         |
| Dhx33          | Phex            |
| Dhx35          | Phf21b:BC048859 |
| Dhx36          | Phka1           |
| Dhx37          | Phox2b          |
| Dhx38          | Pi15            |

|                    |                   |
|--------------------|-------------------|
| Dhx40              | Pif1              |
| Dhx57              | Piga              |
| Dhx8               | Pigg              |
| Dhx9               | Pign:Pig-n        |
| Diablo             | Pigw              |
| Diap1:BC029331     | Pigz              |
| Diap2              | Pik3ap1:AK087295  |
| Dicer1             | Pik3c2g           |
| Dido1              | Pik3cg            |
| Dimt1              | Pik3ip1           |
| Dip2b              | Pilra             |
| Dip2c              | Pion              |
| Diras1             | Pip               |
| Diras2             | Pipox             |
| Dirc2              | Pir               |
| Dis3               | Pirt              |
| Dis3l              | Piwil2            |
| Dis3l2             | Pkd1              |
| Disp2              | Pkd2l2            |
| Dixdc1             | Pkhd1             |
| Dkc1               | Pla2g16           |
| Dkk3:Dkk-3         | Pla2g3            |
| Dlat               | Pla2g4a           |
| Dlc1:A730069N07Rik | Pla2g4c           |
| Dld                | Pla2g4d           |
| Dleu7              | Pla2g5            |
| Dlg1:mKIAA4187     | Pla2g6            |
| Dlg2               | Pla2r1            |
| Dlg3               | Plag1             |
| Dlg4               | Plau              |
| Dlg5               | Plaur             |
| Dlgap1:mKIAA4162   | PLC-epsilon:Plce1 |
| Dlgap2:Sapap2      | Plcb1             |
| Dlgap3             | Plcb3             |
| Dlgap4             | Plcz1             |
| Dlk2               | Plid1             |
| Dll1               | Plid4             |
| Dlst:AK005477      | Plid5             |
| Dlx1               | Plid6             |
| Dlx1               | Plidi             |

|                 |             |
|-----------------|-------------|
| Dlx2            | Plek2       |
| Dlx6            | Plekha2     |
| Dlx6os1         | Plekhf1     |
| Dmap1           | Plekhg2:Clg |
| Dmkn            | Plekhg3     |
| Dmtf1           | Plekhg4     |
| Dmwd            | Plekhh1     |
| Dmxl1:Dxml1     | Plekhh3     |
| Dmxl2           | Plekhn1     |
| Dnahc1          | Plekho2     |
| Dnahc5          | Plg         |
| Dnahc6          | Plin2       |
| Dnahc7b         | Plin5       |
| Dnahc9          | Plod1       |
| Dnaja1:Mir207   | Pls1        |
| Dnaja2:AK163592 | Plscr2      |
| Dnaja3          | Plxdc1      |
| Dnaja4          | Plxdc2      |
| Dnajib1         | Plxnb3      |
| Dnajib11        | Pm20d1      |
| Dnajib12:mDj10  | Pmaip1      |
| Dnajib14        | Pmf1        |
| Dnajib2         | Pmp22       |
| Dnajib4         | Pms1        |
| Dnajib5         | Pnlhc1      |
| Dnajib6         | Pnlipr1     |
| Dnajib9         | Pnp         |
| Dnajc1:MTJ1     | Pnp2        |
| Dnajc10         | Pnpla7      |
| Dnajc11         | Pof1b       |
| Dnajc12         | Pole        |
| Dnajc13         | Polh        |
| Dnajc14         | Poln        |
| Dnajc15         | Polr2a      |
| Dnajc16         | Pon1        |
| Dnajc17         | Pon3        |
| Dnajc18         | Popdc2      |
| Dnajc19         | Postn       |
| Dnajc2          | Poteg       |
| Dnajc21         | Pou1f1      |



|                |              |
|----------------|--------------|
| Dnajc24        | Pou2af1      |
| Dnajc25        | Pou3f4       |
| Dnajc27        | Pou4f1       |
| Dnajc3         | Pou4f2       |
| Dnajc30        | Pou6f2       |
| Dnajc4         | Ppap2c       |
| Dnajc5         | Ppara        |
| Dnajc6         | Ppard        |
| Dnajc7:mDj11   | Pparg        |
| Dnajc8         | Ppnr         |
| Dnajc9         | Ppp1r1c      |
| Dnalc1:Dnal1   | Ppp1r3a      |
| Dnalc4         | Ppp1r3b      |
| Dnase1         | Ppp3r2       |
| Dnase1l2       | Pqlc3        |
| Dnase1l3       | Pramel5      |
| Dnase2a        | Prcp         |
| Dnd1           | Prdm1        |
| Dner           | Prdm14       |
| Dnlz           | Prdm6        |
| Dnm1:mKIAA4093 | Prdx6-rs1-ps |
| Dnm2           | Prelid2      |
| Dnm3           | Prelp        |
| Dnm3os         | Prkd3        |
| Dnmt1          | Prkg1:Prkg1b |
| Dnmt3a         | Prkg2        |
| Dnpep          | Prl3d1       |
| Dnttip1        | Prl7c1       |
| Dnttip2        | Prnd         |
| Doc2a          | Prodh        |
| Doc2b          | Prok2        |
| Doc2g          | Prokr1       |
| Dock11         | Prol1        |
| Dock2          | Prom1        |
| Dock3          | Pros1        |
| Dock6          | Prph         |
| Dock7          | Prph2        |
| Dock8          | Prps1l3      |
| Dock9          | Prr11        |
| Dohh           | Prr13        |

|                  |         |
|------------------|---------|
| Dok3             | Prr16   |
| Dok4             | Prr18   |
| Dok5             | Prr5    |
| Dok6             | Prr5l   |
| Dok7             | Prrg1   |
| DOKist4          | Prrg4   |
| Dolk             | Prrt1   |
| Dolpp1           | Prrt4   |
| Dom3z            | Prrx2   |
| Donson           | Prss23  |
| Dopey1           | Prss37  |
| Dopey2:mKIAA0933 | Prssl1  |
| Dos              | Prtg    |
| Dot1l            | Prtn3   |
| Dpagt1           | Psg29   |
| Dpcd             | Psemb11 |
| Dpf1             | Psemb8  |
| Dpf2             | Psemb9  |
| Dph2             | Pstpip1 |
| Dph3             | Pstpip2 |
| Dph5             | Ptar1   |
| Dpm1             | Ptcra   |
| Dpm2             | Ptgdr   |
| Dpm3             | Ptger1  |
| Dpp10            | Ptger3  |
| Dpp3:AK041330    | Ptges   |
| Dpp6             | Ptgfr   |
| Dpp7             | Ptgfrn  |
| Dpp8             | Ptgr1   |
| Dpp9             | Ptgs1   |
| Dpy19l1          | Ptgs2   |
| Dpy19l3          | Pth2r   |
| Dpy30            | Pthlh   |
| Dpyd             | Ptplad2 |
| Dpys             | Ptpn13  |
| Dpysl2           | Ptpn20  |
| Dpysl3           | Ptpn4   |
| Dpysl4           | Ptpn6   |
| Dpysl5           | Ptprc   |
| DQ072386         | Ptprh   |

|                     |                             |
|---------------------|-----------------------------|
| DQ539915            | Ptprq                       |
| DQ551097            | Ptrf                        |
| DQ553245            | Ptrh1                       |
| DQ693239            | Pvrl4                       |
| DQ699523            | Pxmp2                       |
| DQ711159            | Pycard                      |
| DQ715667            | Pycr1                       |
| DQ715973            | Pygl                        |
| DQ717888            | Pyroxd2:4833409A17Rik       |
| Dr1                 | Pzp                         |
| Dram1:1200002N14Rik | Qrfp                        |
| Dram2               | Qrfpr                       |
| Drap1               | Rab11fip4                   |
| Drg1                | Rab13                       |
| Drg2                | Rab32                       |
| Drosha:Rn3          | Rab38                       |
| Drp1:Dnm1l          | Rab39                       |
| Drp2                | Rab7                        |
| Dscam               | Rab7b:5430435G22Rik:Rab42   |
| Dscam1l             | Rac2                        |
| Dscr3               | Racgap1                     |
| Dse                 | Rad26l:0610007P08Rik        |
| Dsel                | Rad51                       |
| Dstn                | Rad51ap1                    |
| Dstyk               | Rad51ap2                    |
| Dtd1                | Rad51l1                     |
| Dtl:ramp            | Rad9b                       |
| Dtna                | Raet1e:Raet1a:Raet1c:Raet1d |
| Dtnb                | Rag2                        |
| Dtnbp1              | Rai14:mKIAA1334             |
| Dtwd1               | Ranbp3l                     |
| Dtwd2               | RANK:Tnfrsf11a              |
| Dtx1                | Rapgef3                     |
| Dtx2                | Rara                        |
| Dtx3:Deltex3        | Rarb                        |
| Dtx3l               | Rarres2                     |
| Dtx4                | Rasa4                       |
| Dtymk               | Rasal3                      |
| Dus1l               | Rasef                       |
| Dus2l               | Rasgrp3                     |

|                   |              |
|-------------------|--------------|
| Dus3l             | Rasgrp4      |
| Dusp1             | Rasl11a      |
| Dusp11            | Rassf4       |
| Dusp12            | Rassf8       |
| Dusp14            | Rassf8       |
| Dusp15            | Raver1       |
| Dusp16:MKP-7      | Rbbp8        |
| Dusp18            | Rbks         |
| Dusp2             | Rbl1         |
| Dusp22            | Rbm20        |
| Dusp23            | Rbm38        |
| Dusp26            | Rbm46        |
| Dusp28            | Rbm47        |
| Dusp3             | Rbms2        |
| Dusp6             | Rbpms        |
| Dusp7             | Rbpms:Rbpms2 |
| Dusp8             | Rcn3         |
| Dut:Dutp          | Rcvrn        |
| Dvl1              | Rd3          |
| Dvl2              | Rdh12        |
| Dvl3              | Rdh5         |
| Dym               | Rdh9:Rdh1    |
| Dync1h1           | Rdm1         |
| Dync1i1           | Reg4         |
| Dync1i2:Dncic2    | Rel          |
| Dync1li1:AK180240 | Rel2         |
| Dync1li2          | Relt         |
| Dync2li1          | Renbp        |
| Dynll1            | Rest         |
| Dynll2:Gdi-1      | Retsat       |
| Dynlrb1           | Rffl         |
| Dynlt1e:Dynlt1a   | Rfpl3s       |
| Dynlt1e:Dynlt1c   | Rfpl4        |
| Dynlt3            | Rftn2        |
| Dyrk1a            | Rfx2         |
| Dyrk1b            | Rfx6         |
| Dyrk2             | Rgl3         |
| Dyrk3             | Rgs1         |
| dystrophin:Dmd    | Rgs13        |
| Dyx1c1            | Rgs22        |

|                        |                  |
|------------------------|------------------|
| Dzip1                  | Rgs5             |
| Dzip1l                 | Rgs6             |
| Dzip3                  | Rhag             |
| E030024N20Rik          | Rhbdd1           |
| E130012A19Rik          | Rhebl1           |
| E130303B06Rik          | Rhoc             |
| E130308A19Rik          | Rhod             |
| E130309D02Rik          | Rhoh             |
| E130309D14Rik          | Rhoj             |
| E130309F12Rik          | Ribc1            |
| E130311K13Rik          | Ribc2            |
| E2f1                   | Rilp             |
| E2f3:E2F3              | Rims3            |
| E2f4                   | Rims4            |
| E2f5                   | Rin2             |
| E2f6                   | Rinl             |
| E330009J07Rik          | Ripk3            |
| E330016A19Rik          | Ripk4            |
| E330033B04Rik          | Ripply2          |
| E430018J23Rik          | Rln1             |
| E430025E21Rik:Kiaa0196 | Rmnd1            |
| E4f1                   | Rmst:AK083030    |
| E530001F21Rik          | Rnase4           |
| E530011L22Rik          | Rnase9           |
| Eaf1                   | Rnf125           |
| Eapp                   | Rnf135           |
| Ebag9                  | Rnf141           |
| Ebf3:Ebf4:O/E-4S       | Rnf144b          |
| Ebi3                   | Rnf17            |
| Ebna1bp2:D4Ert617e     | Rnf207           |
| Ebp                    | Rnf212           |
| Ebpl                   | Rnf213:AK217856  |
| Ecd                    | Rnf25            |
| Ece1                   | Rnf43            |
| Ece2                   | Rnft1            |
| Ech1                   | Rnls             |
| Echdc2                 | Rom1             |
| Echdc3                 | Ror2             |
| Echs1                  | Rora             |
| Ecm1                   | Rorc:ROR gamma T |

|                |               |
|----------------|---------------|
| Ecsit          | Ros1          |
| Ect2l          | RP23-282C23.3 |
| Eda            | Rpph1         |
| Edc3           | Rps6ka1       |
| Edc4           | Rps6ka3       |
| Edem1          | Rreb1         |
| Edem2          | Rrh           |
| Edem3          | Rs1           |
| Edf1           | Rsad2         |
| Edil3:Del1     | Rsl1:Zfp429   |
| Ednrb          | Rsl1:Zfp429   |
| Eea1           | Rsph1         |
| Eed            | Rsph10b2      |
| Eef1a1         | Rspo1         |
| Eef1a2         | Rtbdn         |
| Eef1b2         | Rtkn2         |
| Eef1d          | Rtl1          |
| Eef1e1         | Rtn4ip1       |
| Eef1g          | Rtp4          |
| Eef2           | Rundc2a:Snx29 |
| Eef2k          | Runx1         |
| Eefsec         | Rxfp1         |
| Eepd1          | S100a9        |
| EF437368       | S100g         |
| EF437368       | S1pr1         |
| EF437385       | S1pr2         |
| Efcab10        | S1pr3         |
| Efcab2         | S1pr4         |
| Efcab5         | Saa3          |
| Efemp2         | Sacs          |
| Efha1          | Sag           |
| Efha2          | Sall1         |
| Efhc1          | Sall4         |
| Efhnd2         | Samd7         |
| Efna2          | Samd9l        |
| Efna5          | Sardh         |
| Efnb1          | Sash3         |
| Efnb2          | Satl1         |
| Efnb3          | Scara3        |
| Efr3a:KIAA0143 | Scara5        |

|                  |             |
|------------------|-------------|
| Efr3b            | Scarf1      |
| Eftud1:AK088822  | Scarf2:NSR1 |
| Eftud2:mKIAA0031 | Scarna3b    |
| EG245297         | Scd3        |
| EG434280         | Scd4        |
| Egf              | Scin        |
| Egfem1           | Scn10a      |
| Egfl7            | Scn11a      |
| Egln1            | Scn4b       |
| Egln2            | Scn7a       |
| Egln3            | Scrg1       |
| Egr1             | Scrn2       |
| Egr2             | Scrt2       |
| Egr3             | Sct         |
| Egr4             | Sctr        |
| Ehbp1:mKIAA0903  | Scube1      |
| Ehbp111          | Scube2      |
| Ehd1             | Scube3      |
| Ehd3             | Scyl2       |
| Ehd4             | Sdc1        |
| Ehmt1            | Sdcbp2      |
| Ehmt2:G9a        | Sdk2        |
| Ei24             | Sdr16c6     |
| Eid1             | Sdr39u1     |
| Eid2             | Sdr42e1     |
| Eid2b            | Sds         |
| Eif1             | Sdsl        |
| Eif1a            | Sebox       |
| Eif1ad           | Sec16b      |
| Eif1ax           | Secisbp2    |
| Eif1b            | Sel1l2      |
| Eif2a            | Selenbp1    |
| Eif2ak1          | Sell        |
| Eif2ak3          | Selm        |
| Eif2ak4          | Selp        |
| Eif2b1           | Selplg      |
| Eif2b2           | Sema3a      |
| Eif2b3           | Sema3b      |
| Eif2b4           | Sema3d      |
| Eif2b5           | Sema4d      |

|                |                |
|----------------|----------------|
| Eif2c2         | Sema5b         |
| Eif2c3:Eif2c1  | Senp1          |
| Eif2c3:meif2C3 | Sepsecs        |
| Eif2c4:meif2C4 | Serhl          |
| Eif2s1         | Serinc4        |
| Eif2s2         | Serpina1f      |
| Eif2s3x        | Serpina3h      |
| Eif2s3y        | Serpina7       |
| Eif3a          | Serpinb10-ps   |
| Eif3b          | Serpinb12      |
| Eif3c          | Serpinb1b      |
| Eif3d          | Serpinb2       |
| Eif3e          | Serpinb5       |
| Eif3f          | Serpinb6b      |
| Eif3g          | Serpinb6c      |
| Eif3h          | Serpinb6e      |
| Eif3i          | Serpinb7       |
| Eif3j          | Serpinb8       |
| Eif3k          | Serpinb9e      |
| Eif3l          | Serpine1       |
| Eif3m          | Serpine3       |
| Eif4a1         | Serpinf1       |
| Eif4a2         | Serpini2       |
| Eif4a3         | Sertad1        |
| Eif4b          | Sesn2:AK155592 |
| Eif4e          | Sesn3          |
| Eif4e2         | Setmar         |
| Eif4e3         | Sf3a2          |
| Eif4ebp2       | Sfn            |
| Eif4enif1      | Sfpi1          |
| Eif4g1         | Sfrp2          |
| Eif4g2         | Sfrp4          |
| Eif4g3         | Sfrp5          |
| Eif4h:AK188353 | Sft2d2         |
| Eif5           | Sfta2          |
| Eif5a          | Sftpa1         |
| Eif5b          | Sftpd          |
| Eif6           | Sgca           |
| Elac1          | Sgcd           |
| Elac2          | Sgcg           |



|           |               |
|-----------|---------------|
| Elavl1    | Sgcz          |
| Elavl2    | Sgk3:Cisk     |
| Elavl3    | Sgms2         |
| Elavl4    | Sgol1:Sgo1    |
| Elf1      | Sh2b3         |
| Elfn1     | Sh2d1a:Xlp    |
| Elfn2     | Sh2d6         |
| Elk1      | Sh3bgr        |
| Elk3      | Sh3bgrl2      |
| Elk4      | Sh3bp1        |
| Ell       | Shc1          |
| Ell2      | Shc3          |
| Ell3      | Shc4:AK148297 |
| Elmo2     | Shcbp1        |
| Elmod1    | She           |
| Elmod2    | Shisa2        |
| Elmod3    | Shpk          |
| Eln       | Shroom1       |
| Elof1     | Shroom3       |
| Elov1     | Shroom4       |
| Elov2     | Siah1b        |
| Elov4     | Siah3         |
| Elov5     | Siglec1       |
| Elov6:FAE | Siglec5       |
| Elov7     | Sik2:SIK2     |
| Elp2      | Sim1          |
| Elp3      | Sis:AK131876  |
| Elp4      | Six1          |
| Emb       | Six3          |
| Emcn      | Six3os1       |
| Emd       | Skint11       |
| Eme2      | Skint3        |
| Emg1      | Skint5        |
| Emid1     | Skint6        |
| Emid2     | Skint8        |
| Emilin2   | Skor2         |
| Eml2      | Slamf6        |
| Eml3      | Slamf9        |
| Eml4      | Slc10a2       |
| Eml5      | Slc10a3       |

|                      |              |
|----------------------|--------------|
| Eml6                 | Slc10a5      |
| Emp1                 | Slc11a1      |
| Emp2                 | Slc12a1      |
| Emp3                 | Slc12a7:Kcc4 |
| Emr1                 | Slc12a8      |
| Emx1                 | Slc13a1      |
| Emx2                 | Slc13a3      |
| Emx2os               | Slc13a5      |
| Enah                 | Slc14a2      |
| Enc1                 | Slc15a2      |
| Endod1               | Slc16a10     |
| Endog                | Slc16a12     |
| Engase:D230014K01Rik | Slc16a9      |
| Enho                 | Slc17a1      |
| Eno1:Gm5506          | Slc17a3      |
| Eno2                 | Slc18a1      |
| Eno4                 | Slc19a2      |
| Enoph1               | Slc19a3      |
| Enox1                | Slc22a14     |
| Enox2                | Slc22a19     |
| Enpp2                | Slc24a1      |
| Enpp4                | Slc24a5      |
| Enpp5                | Slc25a10     |
| Ensa                 | Slc25a13     |
| ENSMUSG00000073777   | Slc25a21     |
| ENSMUSG00000079376   | Slc25a34     |
| Entpd2               | Slc25a45     |
| Entpd3               | Slc26a3      |
| Entpd4               | Slc26a7      |
| Entpd5               | Slc26a8      |
| Entpd6               | Slc27a5      |
| Entpd7               | Slc28a3:Cnt3 |
| Eny2                 | Slc2a10      |
| Eomes                | Slc2a4       |
| Ep300                | Slc2a5       |
| Ep400                | Slc30a8      |
| Epas1                | Slc34a1      |
| Epb4.1               | Slc35d3      |
| Epb4.111             | Slc35f2      |
| Epb4.112             | Slc36a4      |

|                    |                  |
|--------------------|------------------|
| Epb4.113           | Slc37a1          |
| Epb4.114a:Epb4114a | Slc37a2          |
| Epb4.115           | Slc39a8:AK030918 |
| Epb4.9             | Slc40a1          |
| Epc1               | Slc43a3          |
| Epc2               | Slc46a3          |
| Epdr1              | Slc4a11          |
| Epha3              | Slc4a2           |
| Epha4              | Slc5a10          |
| Epha5              | Slc5a12          |
| Epha6              | Slc5a8           |
| Epha7              | Slc5a9           |
| Epha8              | Slc6a12          |
| Ephb1              | Slc6a20b         |
| Ephb2              | Slc6a3           |
| Ephb3              | Slc6a4           |
| Ephb6              | Slc6a9           |
| Ephx1              | Slc7a11          |
| Ephx2              | Slc7a13          |
| Ephx4              | Slc7a15          |
| Epm2a              | Slc7a2           |
| Epm2aip1           | Slc7a7           |
| Epn1               | Slc9a3           |
| Epn2               | Slco1a4          |
| Eprs               | Slco1a5:Slc21a7  |
| Eps15              | Slco1a6          |
| Eps15l1            | Slco1b2          |
| Eps8               | Slco2a1          |
| Ept1:mKIAA1724     | Slco2b1          |
| Epyc               | Slco4a1          |
| Eral1              | Slco4c1          |
| Erap1              | Slco6b1          |
| Erc1               | Slco6d1          |
| Erc2:mKIAA0378     | Slfn10-ps        |
| Erc1               | Slfn3            |
| Erc2               | Slfn4            |
| Erc3               | Slfn8            |
| Erc4               | Slfn9            |
| Erc5:AK163166      | Sln              |
| Erc6               | slp1:Sytl1       |

|                             |                    |
|-----------------------------|--------------------|
| Erc8:CSA                    | Smad3:AK214683     |
| Erf                         | Smad6              |
| Ergic1                      | Smagp              |
| Ergic2                      | Smo:AK053708       |
| Ergic3                      | Smok(Tcr)          |
| Erh                         | Smok2b             |
| Eri1                        | Smpdl3b            |
| Eri2                        | Smp1:1110017D15Rik |
| Eri3                        | Smtn               |
| Erich1                      | Smyd1              |
| Erlec1                      | Snai2              |
| Erlin1                      | Snape2             |
| Erlin2                      | Sned1:Snep         |
| Ernm                        | Snora3             |
| Ermp1                       | Snora81            |
| Ero1l                       | Snord123:AK007719  |
| Ero1lb                      | Snord16a           |
| Erp29                       | Snord1b            |
| Erp44                       | Snord42b           |
| Errfi1                      | Snord4a            |
| Esam                        | Snord52            |
| Esco1:mKIAA1911             | Snord93            |
| Esd                         | Snrpn              |
| Esf1                        | Sntb2              |
| Esr1                        | Sntg2              |
| Esrra                       | Snx33              |
| Esrrg                       | Snx9               |
| Esyt2:Fam62b                | Soat1              |
| Etaa1                       | Socs1              |
| Etf1                        | Socs3              |
| Etfb                        | Socs4              |
| Etfb                        | Socs6:Cis4         |
| Etfdh                       | Sod3               |
| Etl4:Sk1:mKIAA1217:AK018352 | Sorbs3             |
| Etnk1                       | Sox21              |
| Etnk2                       | Sox6               |
| Etohd2                      | Sp100              |
| Etohi1                      | Sp110              |
| Ets2                        | Sp140              |
| Etv1                        | Sp7                |

|                        |                                       |
|------------------------|---------------------------------------|
| Etv3                   | Sp8                                   |
| Etv5                   | Spa17                                 |
| Etv6                   | Spag17                                |
| EU234017               | Spag4                                 |
| Evc2                   | Spag5                                 |
| Evi2b                  | Spam1                                 |
| Evi5                   | Spata13                               |
| Evi5:AK009699:AK191425 | Spata16                               |
| Evl                    | Spata17                               |
| Ewsr1                  | Spata22                               |
| Exd2:Exdl2             | Spata24                               |
| Exoc1                  | Spata3                                |
| Exoc2                  | Spata5l1                              |
| Exoc3                  | Spata9:AK020885                       |
| Exoc4                  | Spats1                                |
| Exoc5:AK049416         | Spdef                                 |
| Exoc6                  | Spdya                                 |
| Exoc6b                 | Speer3                                |
| Exoc7                  | Speer4a                               |
| Exoc8                  | Speer4b                               |
| Exog                   | Speer7-ps1                            |
| Exosc1                 | Speer8-ps1                            |
| Exosc10                | Spf2                                  |
| Exosc2                 | Spem1                                 |
| Exosc3                 | Sphk1                                 |
| Exosc4                 | Spin4                                 |
| Exosc6                 | Spink13                               |
| Exosc7                 | Spink2                                |
| Exosc8                 | Spink5                                |
| Exosc9                 | Spink6                                |
| Ext1                   | Spinkl                                |
| Ext2                   | Spint1                                |
| Extl1                  | Spire2                                |
| Extl2                  | Spn                                   |
| Extl3                  | Spp1                                  |
| Eya1                   | Spsb1                                 |
| Eya2                   | Spsb2                                 |
| Eya3                   | Spsb4                                 |
| Ezh1                   | Sqrdl                                 |
| Ezh2                   | p:AK142089:AK169954:AK186849:AK185421 |

|                      |                  |
|----------------------|------------------|
| Ezr                  | Srfbp1           |
| F2r                  | Srgn             |
| F730047E07Rik:Mms22l | Srp54a           |
| F8a                  | Ssfa2            |
| Faah                 | Ssh1             |
| Fabp3                | Sspn             |
| Fabp5                | St14             |
| Fabp7                | St6gal2          |
| Fads1                | St6galnac3       |
| Fads2                | Stab2:MFEEL-2    |
| Fads3                | Stac2            |
| Faf1                 | Stap2            |
| Fah                  | Stard13          |
| Fahd1                | Stard9           |
| Fahd2a               | Stard9:mKIAA1300 |
| Faim                 | Stat5a           |
| Faim2                | Stat6            |
| Fam100a              | Stc2             |
| Fam100b              | Steap1           |
| Fam101b              | Steap4           |
| Fam102a              | Stfa1            |
| Fam102b              | Stfa2            |
| Fam103a1             | Stil             |
| Fam105a              | Stk17b           |
| Fam105b              | Stk31            |
| Fam107b              | Stk32a           |
| Fam108a              | Stk36            |
| Fam108b:Fam108b1     | Stmn1-rs1        |
| Fam108c              | Stom             |
| Fam109a              | Ston1            |
| Fam110a              | Stox1            |
| Fam110b              | Stra8            |
| Fam113a              | Strn             |
| Fam113b              | Stx19            |
| Fam114a1             | Styx11           |
| Fam114a2             | Sucg2:Scs        |
| Fam115a              | Sucnr1           |
| Fam116a              | Sufu             |
| Fam116b              | Sulf1            |
| Fam117a              | Sult1a1          |

|                   |                 |
|-------------------|-----------------|
| Fam117b           | Sult1b1         |
| Fam118a           | Sult1e1         |
| Fam118b           | Sult2a4         |
| Fam120a           | Sult2a5         |
| Fam120b           | Sult5a1:SULT-X1 |
| Fam120c           | Sult6b1         |
| Fam122a           | Supt16h         |
| Fam123a           | Susd2           |
| Fam123b           | Susd5           |
| Fam123c           | Sval1           |
| Fam125a           | Sval2           |
| Fam125b:mFLJ00022 | Svep1           |
| Fam126a:Drctnnb1a | Svil            |
| Fam126b           | Svopl           |
| Fam129b           | Svs2            |
| Fam131a           | Swap70          |
| Fam131b           | Syce1           |
| Fam132a           | Sycp1           |
| Fam133b:AK172704  | Sycp1-ps1       |
| Fam134a           | Syde1           |
| Fam134b           | Synpo2          |
| Fam134c           | syt XV-a:Syt15  |
| Fam135a           | Syt10           |
| Fam135b           | Syt14:sytXIV    |
| Fam136a           | Syt6            |
| Fam13a            | Syt15           |
| Fam149a           | T               |
| Fam149b:Fam149b1  | T2              |
| Fam150b           | Taar7a          |
| Fam151b           | Tac2            |
| Fam154b           | Tacr1           |
| Fam155a           | Tagln2          |
| Fam158a           | Tanc1:AK134490  |
| Fam160a2          | Tap1            |
| Fam160b2          | Tapbp1          |
| Fam161a           | Tarbp1          |
| Fam161b           | Tas2r105        |
| Fam162a           | Tas2r108        |
| Fam163a           | Tas2r140        |
| Fam163b           | Tax1bp3         |

|                       |                                     |
|-----------------------|-------------------------------------|
| Fam164a               | Tbc1d2                              |
| Fam165b               | Tbc1d20                             |
| Fam167a               | Tbc1d4                              |
| Fam168a               | Tbc1d8b                             |
| Fam168b               | Tbx18                               |
| Fam169a               | Tbx20                               |
| Fam171a1              | Tbx3                                |
| Fam171a2              | Tbx6                                |
| Fam171b               | Tbxas1                              |
| Fam172a               | Tc2n                                |
| Fam173a               | Tcap                                |
| Fam173b               | Tcea3                               |
| Fam174a               | Tceanc                              |
| Fam174b               | Tcf19                               |
| Fam175a               | Tcf23                               |
| Fam175b:AK158854      | Tcf3                                |
| Fam176a               | Tcf7                                |
| Fam178a               | Tcf7l1                              |
| Fam179b               | Tcf7l2                              |
| Fam181b               | Tcfap2a                             |
| Fam183b               | Tcfap2b                             |
| Fam184a               | Tcfap2c                             |
| Fam184b               | Tchh                                |
| Fam185a               | Tcn2                                |
| Fam188a               | Tcp11                               |
| Fam188b               | TCR-alpha chain:Tcra:Gm16914:M26425 |
| Fam189a1              | Tcrg-C                              |
| Fam189a2              | Tctn1:Tect1                         |
| Fam189b:1110013L07Rik | Tdgf1                               |
| Fam18a                | Tdrd12                              |
| Fam18b                | Tdrd5                               |
| Fam190a               | Tdrd6                               |
| Fam190b:Gcap14        | Tead2                               |
| Fam192a               | Tead4                               |
| Fam193a:BC037112      | Tecr1                               |
| Fam193b               | Tecta                               |
| Fam195a               | Tectb                               |
| Fam195b               | Tek                                 |
| Fam196a:B830028B13Rik | Tekt4                               |
| Fam199x               | Tem8:Antxr1                         |



|                      |             |
|----------------------|-------------|
| Fam19a1              | Tert        |
| Fam19a2              | Tes         |
| Fam19a5              | Tesk2       |
| Fam20a               | Tex14       |
| Fam20b               | Tex9:tsec-1 |
| Fam20c               | Tfdp1       |
| Fam26e               | Tfdp2       |
| Fam32a               | Tfec:Tcfec  |
| Fam33a:1110001A07Rik | Tg          |
| Fam36a               | Tgfb1       |
| Fam3a                | Tgif1       |
| Fam3c                | Tgif2       |
| Fam40a               | Tgm5        |
| Fam43a               | Tgm6        |
| Fam43b               | Tha1        |
| Fam45a               | Thap4       |
| Fam48a:D3ErtD300e    | Thap6       |
| Fam49a               | Thbs2       |
| Fam49b               | Thbs4       |
| Fam50a               | Them5       |
| Fam53a               | Thns12      |
| Fam53c               | Thsd1       |
| Fam54b               | Thsd4       |
| Fam55c               | Thumpd2     |
| Fam55d               | Ticam1      |
| Fam57a               | Tifa        |
| Fam57b               | Tifab       |
| Fam58b               | Timd2       |
| Fam59a               | Timd4       |
| Fam59b               | Timeless    |
| Fam5b                | Timp1       |
| Fam5c:EF410083       | Tinag       |
| Fam60a               | Tirap       |
| Fam63a               | Tk1         |
| Fam63b:mKIAA1164     | Tktl2       |
| Fam65a:Mir1966       | Tlcd2       |
| Fam65b               | Tle6        |
| Fam69a               | Tll1        |
| Fam69b               | Tlr13       |
| Fam69c               | Tlr2        |

|                 |                  |
|-----------------|------------------|
| Fam70a          | Tlr3             |
| Fam71e1:GARI-L5 | Tlr4             |
| Fam73a          | Tlr7             |
| Fam73b          | Tm4sf1           |
| Fam76a          | Tmbim1           |
| Fam76b          | Tmc1             |
| Fam78a          | Tmc4             |
| Fam78b          | Tmco4            |
| Fam81a          | Tmco5            |
| Fam82a1         | Tmco5b           |
| Fam82a2         | Tmed11           |
| Fam82b:AK040948 | Tmem106a         |
| Fam84a          | Tmem107          |
| Fam84b          | Tmem116          |
| Fam86           | Tmem119          |
| Fam92a          | Tmem126b         |
| Fam96a          | Tmem132c         |
| Fam96b          | Tmem132d         |
| Fam98a          | Tmem144          |
| Fam98b          | Tmem170          |
| Fancc           | Tmem173          |
| Fancd2          | Tmem176a         |
| Fance           | Tmem195          |
| Fancg           | Tmem196          |
| Fanci           | Tmem207          |
| Fancm           | Tmem218          |
| Fank1           | Tmem232          |
| Far1            | Tmem29           |
| Far2            | Tmem37           |
| Farp1           | Tmem40           |
| Fars2           | Tmem45a          |
| Farsa           | Tmem45b          |
| Farsb           | Tmem48           |
| Fasn            | Tmem51           |
| Fastk:AK190497  | Tmem55b          |
| Fastkd1         | Tmem63a          |
| Fastkd2         | Tmem71           |
| Fastkd3         | Tmem74           |
| Fastkd5         | Tmem8c           |
| Fat1 :mfat1     | Tmem92-ps:Tmem92 |

|                     |                   |
|---------------------|-------------------|
| Fat3                | Tmem98            |
| Fat4                | Tmie              |
| Fau                 | Tmigd1            |
| Fbf1                | Tmpo              |
| Fbl                 | Tmprss11d         |
| Fblim1              | Tmprss11e         |
| Fbl1                | Tmprss15          |
| Fbln1               | Tmprss5           |
| Fbn1                | Tmprss9           |
| Fbn2:mKIAA4226      | Tmtc2             |
| Fbrs                | Tnc               |
| Fbrs1:2410025L10Rik | Tnf               |
| Fbx12               | Tnfaip2           |
| Fbx14               | Tnfaip6           |
| Fbx15               | Tnfaip8l2         |
| Fbx16               | Tnfaip8l3         |
| Fbx17               | Tnfrsf13c         |
| Fbx18               | Tnfrsf17          |
| Fbx19               | Tnfrsf1b:AK170464 |
| Fbx12               | Tnfrsf23:Tnfrh1   |
| Fbx120              | Tnfrsf25          |
| Fbx121              | Tnfsf10           |
| Fbx122              | Tnfsf13b:Baff     |
| Fbx13               | Tnip3             |
| Fbx14               | Tnmd              |
| Fbx15               | Tnnc1             |
| Fbx16               | Tnni1             |
| Fbx17               | Tnni2             |
| Fbxo10              | Tnni3             |
| Fbxo11              | Tnnt2             |
| Fbxo16              | Tns1              |
| Fbxo18              | Tns3              |
| Fbxo2               | Tns4              |
| Fbxo21              | Tom1              |
| Fbxo22              | Tomt              |
| Fbxo25              | Tonsl:Nfkbil2     |
| Fbxo27              | Top2a             |
| Fbxo28              | Top3a             |
| Fbxo3:Fba           | Tor3a             |
| Fbxo30              | Tox2              |

|              |                  |
|--------------|------------------|
| Fbxo31       | Tph1             |
| Fbxo33       | Tph2             |
| Fbxo34       | Tpk1:mTPK1       |
| Fbxo38       | Tpm2             |
| Fbxo4        | Tpte             |
| Fbxo41       | Tpx2             |
| Fbxo42       | Traf1            |
| Fbxo44       | Traf2            |
| Fbxo45       | Trat1            |
| Fbxo46       | Trdmt1           |
| Fbxo6        | Trdn             |
| Fbxo7        | Trem2            |
| Fbxo8        | Trem14           |
| Fbxo9        | Trim14:pub       |
| Fbxw17       | Trim15           |
| Fbxw2        | Trim16:Fbxw10    |
| Fbxw2        | Trim21           |
| Fbxw4        | Trim25           |
| Fbxw5        | Trim26           |
| Fbxw7        | Trim29           |
| Fbxw8        | Trim30a:Trim30   |
| Fbxw9        | Trim30d          |
| Fcf1         | Trim34:Trim34a   |
| Fcgr3        | Trim43b          |
| Fcho1        | Trim47           |
| Fcho2        | Trim56           |
| Fchsd1       | Trim6            |
| Fcrls        | Trim65           |
| Fdft1        | Trim7            |
| Fdps         | Trim71           |
| Fdx1         | Trim72           |
| Fdxr         | Trip11           |
| Fech         | Trmt2b           |
| FELE-1:Stab1 | Troap            |
| Fem1a        | Trp53inp1        |
| Fem1b        | Trp53rk:AK077074 |
| Fem1c        | Trpa1            |
| Fen1         | Trpc6            |
| Fermt2       | Trpd52l3         |
| Fert2:Fer    | Trpm1            |

|                        |                 |
|------------------------|-----------------|
| Fetub                  | Trpm3           |
| Fez1                   | Trpm6           |
| Fez2                   | Trpm8           |
| Fezf2                  | Trpv5           |
| Fgd4                   | Trpv6           |
| Fgd4                   | Try5            |
| Fgd5                   | Tsga13          |
| Fgf10                  | Tshr            |
| Fgf12                  | Tslp            |
| Fgf13                  | Tsnax           |
| Fgf14:FGF-14C (FHF-4C) | Tspan10         |
| Fgf18                  | Tspan15         |
| Fgf5                   | Tspan8          |
| Fgf9                   | Tstd2           |
| Fgfbp3                 | Ttc12           |
| Fgfr1                  | Ttc18           |
| Fgfr1op                | Ttc23l          |
| Fgfr1op2               | Ttc29           |
| Fgfr2                  | Ttc32           |
| Fgfr3                  | Ttc39d          |
| Fgfrl1                 | Ttf2            |
| Fggy                   | Ttk             |
| Fh1                    | Ttll13          |
| Fhit                   | Ttll3           |
| Fhl1                   | Ttll4:mKIAA0173 |
| Fhl2                   | Ttll8:AK006138  |
| FHOS2:Fhod3            | Ttll9           |
| Fibcd1                 | Ttn:AK086312    |
| Fibin                  | Ttpa            |
| Fibp                   | Ttr             |
| Ficd                   | Tuba8           |
| Fig4                   | Tubb6           |
| Figf                   | Tuft1           |
| Figl1                  | Tulp4           |
| Filip1                 | Twist1          |
| Filip1l                | Twist2          |
| Fip1l1                 | Txk             |
| Fis1                   | Txlnb           |
| Fiz1                   | Txndc3          |
| Fjx1                   | Typr1:AK205981  |

|                  |                                                     |
|------------------|-----------------------------------------------------|
| Fkbp14           | U09772                                              |
| Fkbp15           | Uaca                                                |
| Fkbp1a:FKBP12-T1 | Ube2c                                               |
| Fkbp1b:FKBP1b-B  | Ube2t                                               |
| Fkbp2            | Ube2u                                               |
| Fkbp3            | Ube2v2:Ube2v1                                       |
| Fkbp4            | Ubl7                                                |
| Fkbp5            | Ubox5                                               |
| Fkbp7            | Ubxn10                                              |
| Fkbp8            | Ubxn6                                               |
| Fkbp9            | Ucma                                                |
| Fkbp1            | Ucn2                                                |
| Fkrp             | Ucp1                                                |
| Fktn             | Ucp2                                                |
| Flad1:Lenep      | Ugt1a7c:Ugt1a6b:Ugt1a6:Ugt1a6a:Ugt1a5:Ugt1a2:Ugt1a1 |
| Flame-3:Dedd2    | Ugt8a                                               |
| Flcn             | Uhmk1                                               |
| Flii             | Uhrf1                                               |
| Flna             | Ulbp1                                               |
| Flnb             | Unc45b                                              |
| Flot1            | Unc93a:Gm8597                                       |
| Flot2            | Unc93b1                                             |
| Flrt1            | Ung                                                 |
| Flrt2            | Upk2                                                |
| Flrt3            | Upp1                                                |
| Flt3             | Uprt                                                |
| Flt3l            | Urb2:mKIAA0133                                      |
| Flywch1          | Ush2a:Ush2A                                         |
| Flywch2          | Usp49                                               |
| Fmn2             | Usp51                                               |
| Fmn11:Fr1        | Usp53                                               |
| Fmn12:mKIAA1902  | Usp9y                                               |
| Fmr1             | Utp14b                                              |
| Fn1              | Uxs1                                                |
| Fn3k             | Vamp5                                               |
| Fnbp1            | Vamp8                                               |
| Fnbp1l           | Vangl1                                              |
| Fnbp4            | Vav1                                                |
| Fndc1            | Vav2:VAV2                                           |
| Fndc3a:mKIAA0970 | Vax2                                                |

|               |                         |
|---------------|-------------------------|
| Fndc3b:fad104 | Vax2os2:Vax2os1         |
| Fndc4         | Vcan                    |
| Fndc5         | Vdr                     |
| Fnip1         | Vegfc                   |
| Fnip2         | Veph1:Veph-A            |
| Fnta          | Vgll2                   |
| Fntb          | Vgll3                   |
| Fos           | Vip                     |
| Fosb          | Vipr1                   |
| Fosl2         | Vit                     |
| Foxc1         | Vmac                    |
| Foxg1         | Vmn1r100                |
| Foxj2         | Vmn1r179                |
| Foxj3         | Vmn1r185                |
| Foxk1         | Vmn1r223                |
| Foxk2         | Vmn1r31                 |
| Foxn2         | Vmn1r32                 |
| Foxo1         | Vmn1r39                 |
| Foxo6         | Vmn1r43                 |
| Foxp1         | Vmn1r51                 |
| Foxp4:mFKHLA  | Vmn1r64                 |
| Foxr2         | Vmn1r68                 |
| Foxred1       | Vmn2r-ps14              |
| Foxred2       | Vmn2r-ps160:Vmn2r88:VR3 |
| Fpgs          | Vmn2r102                |
| Fpgt          | Vmn2r103                |
| Fras1         | Vmn2r106                |
| Frat1         | Vmn2r109                |
| Frat2         | Vmn2r111                |
| Frg1          | Vmn2r121                |
| Frmd3         | Vmn2r25                 |
| Frmd4a        | Vmn2r29                 |
| Frmd4b        | Vmn2r31                 |
| Frmd5         | Vmn2r33                 |
| Frmd7         | Vmn2r45                 |
| Frmpd1        | Vmn2r51                 |
| Frmpd3        | Vmn2r61                 |
| Frmpd4        | Vmn2r70                 |
| Frs2          | Vmn2r73                 |
| Frs3          | Vmn2r74                 |

|                      |                 |
|----------------------|-----------------|
| Fry                  | Vmn2r77         |
| Fryl                 | Vmn2r78         |
| Frzb                 | Vmn2r79         |
| Fscn1                | Vmn2r85         |
| Fsd1                 | Vmn2r87         |
| Fsd1l                | Vmn2r94         |
| Fst                  | Vmo1            |
| Fstl1                | Vrk2            |
| Fstl4:mKIAA1061      | Vsig10:BC023744 |
| Fstl5                | Vsig8           |
| Fth1                 | Vsx1            |
| Ftl1                 | Vtcn1           |
| Ftl2                 | Vwa5a           |
| Fto                  | Vwa5b1          |
| Ftsj1                | Vwde            |
| Ftsj2                | Vwf             |
| Ftsj3                | Wars2           |
| Ftsjd1               | Was             |
| Ftsjd2               | Wasf2:AK199358  |
| Fubp1                | Wdfy2           |
| Fubp3                | Wdfy4           |
| Fuca1                | Wdhd1           |
| Fuca2                | Wdr16           |
| Fuk:FuK              | Wdr27           |
| Fundc1               | Wdr38           |
| Fundc2               | Wdr52           |
| Furin                | Wdr5b           |
| Fus:Gm10167:AK134717 | Wdr63           |
| Fut11:AK204442       | Wdr64           |
| Fut8                 | Wdr72           |
| Fut9                 | Wdr93           |
| Fxc1:Dnhd1:mFLJ00251 | Wdyhv1          |
| Fxc1:Tim9b           | Wfdc11          |
| Fxn                  | Wfdc2           |
| Fxr1                 | Wfdc3           |
| Fxr2                 | Wfdc5           |
| Fxyd1                | Wif1            |
| Fxyd2                | Wipf1           |
| Fxyd5                | Wisp1:Elm1      |
| Fxyd6                | Wisp2           |



|                 |                  |
|-----------------|------------------|
| Fxyd7           | Wisp3            |
| Fyb             | Wnk3             |
| Fyco1           | Wnt16            |
| Fyn             | Wnt2b            |
| Fytd1           | Wnt3             |
| Fzd1            | Wnt5b            |
| Fzd3            | Wnt8b            |
| Fzd4            | Wnt9a            |
| Fzd8            | Wrn              |
| Fzd9            | Wwp2             |
| Fzr1:Fyr        | Xaf1             |
| G2e3            | Xcr1             |
| G3BP:G3bp1      | Xirp2            |
| G3bp2           | Xist             |
| G530011O06Rik   | Xkr5             |
| G6pc3           | Xkr7             |
| G6pdx           | Xkr8             |
| Gaa             | Xkrx             |
| Gab1            | Xlr              |
| Gab2            | Xlr3a            |
| Gab3            | Xlr4a            |
| Gabarap         | Xpnpep2          |
| Gabarapl1       | Xpo5:mKIAA1291   |
| Gabarapl2       | XT-I             |
| Gabbr1:GABA-B-R | Xylb             |
| Gabpa           | Ysk4             |
| Gabpb1          | Zadh2            |
| Gabra1          | Zbtb10           |
| Gabra2          | Zbtb12           |
| Gabra3          | Zbtb26           |
| Gabra4          | Zbtb3            |
| Gabra5          | Zbtb32           |
| Gabrb1          | Zbtb37           |
| Gabrb2          | Zbtb39           |
| Gabrb3          | Zbtb44           |
| Gabrd           | Zbtb49:Zfp509    |
| Gabrg1          | Zbtb7b           |
| Gabrg2          | Zbtb7c           |
| Gabrg3          | Zc3h12d          |
| Gad1            | Zc3hav1:AK167137 |

|                        |                 |
|------------------------|-----------------|
| Gad2                   | Zcchc24         |
| Gadd45b                | Zcwpw2          |
| Gadd45g                | Zdhhc1          |
| Gadd45gip1             | Zdhhc22         |
| Gak                    | Zfhx3           |
| Gal3st3                | Zfp109          |
| Galc                   | Zfp11           |
| Gale                   | Zfp111          |
| Galk1                  | Zfp112          |
| Galk2                  | Zfp113          |
| Galm                   | Zfp114          |
| Galns                  | Zfp119:Zfp119a  |
| Galnt1                 | Zfp128          |
| Galnt10                | Zfp14           |
| Galnt11                | Zfp146          |
| Galnt13                | Zfp202          |
| Galnt14:mpp-GalNAc-T14 | Zfp217          |
| Galnt2                 | Zfp219          |
| Galnt3                 | Zfp229:BC043476 |
| Galnt4                 | Zfp296          |
| Galnt7                 | Zfp300          |
| Galnt9                 | Zfp354b         |
| Galnt11                | Zfp36           |
| Galnt14                | Zfp369          |
| Galnt16                | Zfp3612         |
| Galt                   | Zfp385c         |
| Gamt                   | Zfp389          |
| Gan                    | Zfp395          |
| Ganab:mKIAA0088        | Zfp418          |
| Ganc:Capn3:mFLJ00088   | Zfp438          |
| Gap43                  | Zfp455          |
| Gapdh                  | Zfp456          |
| Gapvd1                 | Zfp459          |
| Gar1                   | Zfp473          |
| Garnl3                 | Zfp493          |
| Gars                   | Zfp498          |
| Gart                   | Zfp503          |
| Gas1                   | Zfp516          |
| Gas2                   | Zfp521          |
| Gas2l1                 | Zfp54           |

|                 |                  |
|-----------------|------------------|
| Gas2l3          | Zfp541           |
| Gas5            | Zfp568           |
| Gas6            | Zfp57            |
| Gas7            | Zfp574           |
| Gas8            | Zfp59            |
| Gatad1:AK162341 | Zfp595           |
| Gatad2a         | Zfp599           |
| Gatad2b         | Zfp623           |
| Gatc            | Zfp629:mKIAA0326 |
| Gatm            | Zfp646           |
| Gatsl2          | Zfp652           |
| Gba             | Zfp661           |
| Gbas            | Zfp663           |
| Gbe1            | Zfp672           |
| Gbf1:mKIAA0248  | Zfp677           |
| Gca             | Zfp709           |
| Gcat            | Zfp747           |
| Gcc1            | Zfp750           |
| Gcc2            | Zfp759           |
| Gcdh            | Zfp764           |
| Gcfc1:C21orf66  | Zfp773           |
| Gclc            | Zfp78            |
| Gclm            | Zfp781           |
| Gcm1            | Zfp787           |
| Gcn1l1          | Zfp791           |
| Gcnt2           | Zfp804b          |
| Gcsh            | Zfp81            |
| Gda             | Zfp819           |
| Gdap1           | Zfp820           |
| Gdap1l1         | Zfp831           |
| Gdap2           | Zfp85-rs1        |
| Gde1            | Zfp862           |
| Gdf10           | Zfp869           |
| Gdi1            | Zfp872           |
| Gdi2            | Zfp874b          |
| Gdpd1           | Zfp882           |
| Gdpd2           | Zfp931           |
| Gdpd3           | Zfp936           |
| Gdpd5           | Zfp953           |
| Gemin4          | Zfp957           |

|                |                  |
|----------------|------------------|
| Gemin5         | Zfp97            |
| Gemin6         | Zhx3             |
| Gemin7         | Zic1             |
| Gemin8         | Zic2             |
| Get4           | Zic3             |
| Gfer           | Zic4             |
| Gfm1           | Zkscan2          |
| Gfm2:AK020100  | Zkscan4          |
| Gfod1          | Znf618:Zfp618    |
| Gfod2          | Znrd1as          |
| Gfpt1          | Zp1              |
| Gfpt2          | Zp3              |
| Gfra2          | Zp3r             |
| Gga1           | Zpbp             |
| Gga2:mKIAA1080 | Zpbp2            |
| Gga3:mKIAA0154 | Zpld1            |
| Ggct           | Zscan20          |
| Ggcx           | Zscan22          |
| Ggh            | Zscan30:Zfp397os |
| Ggnbp2:DIF-3   | Zscan4c          |
| Ggps1:AK007605 | Zscan4d          |
| Ggt7           | Zswim2           |
| Ghdc           |                  |
| Ghitm          |                  |
| Ghr            |                  |
| Ghrl           |                  |
| Gig18:mCG_2776 |                  |
| Gigyf1         |                  |
| Gigyf2         |                  |
| Gin1           |                  |
| Gins1          |                  |
| Gins2          |                  |
| Gins3          |                  |
| Gins4          |                  |
| Gipc1          |                  |
| Git1           |                  |
| Git2           |                  |
| Giyd1:Slx1b    |                  |
| Gja1           |                  |
| Gjc1           |                  |

Gjd2  
Gkap1  
Gla  
Glb1  
Glb1l  
Glcci1  
Glce:AK043361  
Gle1  
Glepp1:Ptpro  
Glg1  
Glis2  
Glmn  
Glo1  
Glod4  
Glra2  
Glrb  
Glrx  
Glrx2  
Glrx3  
Glrx5  
Gls  
Gls2  
Glt25d1:AK135643  
Glt25d2  
Glt8d1  
Glt8d2  
Gltg  
Gltgd1  
Gltscr2  
Glud1  
Glul  
Glyr1:3930401K13Rik  
Gm10012  
Gm10069  
Gm10094  
Gm10125  
Gm10348  
Gm10406

:Gm2897:ENSMUSG00000068790:LOC100036568

m10408:Gm2897:ENSMUSG00000063277

Gm10471  
Gm10493  
Gm10516  
Gm10536  
Gm1060  
Gm10638  
Gm10653:Rps2  
Gm10767  
Gm10845  
Gm11346  
Gm11517  
Gm11744:Prd  
Gm11818  
Gm11968  
Gm11978  
Gm12166  
Gm12359  
Gm12657  
Gm129  
Gm12942  
Gm13139:1700029101Rik:Gm13152  
Gm13157  
Gm13251  
Gm13253  
Gm13375  
Gm13476  
Gm13611  
Gm13889  
Gm14326  
Gm14403  
Gm14420  
Gm14446  
Gm15070  
Gm15450  
Gm1568  
Gm15760  
Gm15800  
Gm15800:mKIAA0614  
Gm16062  
Gm16432:EG545391

Gm16515

Gm16517

Gm16523

Gm166

Gm1673

Gm1943

Gm2058

Gm2382:AK149842:100039707

Gm2506:Ccl27a

Gm2694

97:Gm10406:ENSMUSG00000068790:Gm3020

Gm2a

Gm3219

Gm3230

Gm3258

Gm3435

Gm3435:2210404J11Rik

Gm347

Gm3604

Gm4532

Gm4769:AK008833

Gm4987

Gm5

Gm5077

Gm5088

Gm5113

Gm5124

Gm5148:EG381438

Gm5151

Gm527

Gm5415

Gm5464

Gm5506:AK180697

Gm5531

Gm5595

Gm561

Gm5617

Gm5820

Gm5918

Gm608

Gm6194  
Gm6222  
Gm6225  
Gm6300  
Gm6402  
Gm6548  
Gm6578  
Gm6635:Rpl31  
Gm6642  
Gm672  
Gm6788  
Gm6994  
Gm71  
Gm7324:Rbmx  
Gm7694  
Gm7854  
Gm8234  
Gm8773  
Gm88  
Gm9104  
Gm9767  
Gm9790:Higd1a  
Gm996  
Gm9962  
Gmcl1  
Gmeb1  
Gmeb2  
Gmfb  
Gmip  
Gmppa  
Gmppb  
Gmpr  
Gmpr2  
Gmps  
Gna11  
Gna13  
Gnai1  
Gnai2  
Gnai3  
Gnal



Gnao1  
Gnaq  
Gnas  
Gnas  
Gnaz  
Gnb1  
Gnb1l:Wdvcf  
Gnb2  
Gnb2l1:Snord96a  
Gnb4:Gnb2  
Gnb5  
Gne  
Gng10  
Gng12  
Gng13  
Gng2  
Gng3  
Gng4  
Gng5  
Gng7  
Gnl1  
Gnl2  
Gnl3  
Gnl3l  
Gnpat:AK148282  
Gnpda1  
Gnpda2  
Gnpnat1  
Gnptab  
Gnptg  
Gns:AK081796  
GODZ:Zdhhc3  
Golga1  
Golga2:mKIAA4150  
Golga3  
Golga4  
Golga5  
Golga7  
Golga7b  
Golgb1:AK089379

Golim4

Golm1

Golph3

Golph3l

Golt1b

Gon4l:mKIAA1606:5830417110Rik

Gopc

Gorab

Gorasp1

Gorasp2

Gosr1

Gosr2

Got1

Got2

Gp1bb

Gpaa1

Gpank1

Gpatch1:Gpatc1

Gpatch2

Gpatch3

Gpatch4

Gpatch8

Gpbp1

Gpbp1l1

Gpc1

Gpc2

Gpc3

Gpc4

Gpc5

Gpc6

Gpcpd1

Gpd1

Gpd1l

Gpd2

Gphn

Gpi1

Gpkow

Gpm6a

Gpm6b:M6B

Gpn1

Gpn3  
Gpr107  
Gpr108  
Gpr12  
Gpr123  
Gpr124:Tem5  
Gpr125  
Gpr135  
Gpr137  
Gpr137b  
Gpr137b-ps  
Gpr137c  
Gpr146  
Gpr150  
Gpr153  
Gpr155  
Gpr156  
Gpr157  
Gpr158  
Gpr162  
Gpr171  
Gpr172b  
Gpr173  
Gpr176  
Gpr180  
Gpr183  
Gpr19  
Gpr22  
Gpr25  
Gpr26  
Gpr37  
Gpr3711  
Gpr4  
Gpr45  
Gpr56  
Gpr6  
Gpr61  
Gpr64  
Gpr68  
Gpr75

Gpr83  
Gpr85  
Gpr88  
Gpr89  
Gprasp1  
Gprasp2  
Gprin1  
Gprin3  
Gps1  
Gps2  
Gpsm1  
Gpt  
Gpt2  
Gpx1  
Gpx4:GPx4  
Gpx7  
Gpx8  
Gramd1a  
Gramd1b  
Gramd4  
Grasp  
Grb10  
Grb14  
Grb2  
Grcc10  
Grem2  
Grhl1  
Grhpr  
Gria1:glur-1  
Gria2  
Gria3:GluR alpha3  
Gria4:glur-4  
Grid1  
Grik1  
Grik2  
Grik4  
Grik5  
Grin1  
Grin2a:AK086290  
Grin2b

Grin3a

Grina

Grinl1a

Grip1

Grip2

Gripap1

Grk1

Grk4

Grk5

Grk6:GRK6

Grif1

Grm1

Grm2

Grm3

Grm4

Grm5

Grm7

Grn

Grp

Grpel1

Grpel2

Grsf1

Grtp1

Grwd1

Gsdmc2:Gsdmc:Gsdmc4

Gse1

Gsk3a

Gsk3b

Gsn

Gspt1

Gspt2:AK050859

Gsr

Gss

Gsta4

Gstm1

Gstm4

Gstm5

Gstm6

Gstm7

Gsto1

Gstp1  
Gstz1  
Gt(ROSA)26Sor  
Gtdc1  
Gtf2a1  
Gtf2a2  
Gtf2b  
Gtf2e1  
Gtf2e2  
Gtf2f1  
Gtf2f2  
Gtf2h2  
Gtf2h3  
Gtf2h4  
Gtf2h5  
Gtf2i:Diws1t  
Gtf2ird1  
Gtf2ird2  
Gtf3a  
Gtf3c1:AK134249  
Gtf3c3  
Gtf3c4  
Gtf3c6  
Gtl3  
Gtpbp1  
Gtpbp10  
Gtpbp2  
Gtpbp3  
Gtpbp4  
Gtpbp5  
Gtpbp8  
GU332589  
Gucy1a2  
Gucy1a3  
Gucy1b2  
Gucy1b3  
Gucy2e  
Guf1:BC034252  
Guk1  
Gulp1

Gxylt1  
Gxylt2  
Gyg  
Gyk  
Gys1  
Gzf1  
Gzmm:MMET-1  
H13  
H1f0  
H1fx  
H2-D1:H2-B2  
H2-DMa  
H2-DMb1:H2-DMb2  
H2-K1  
H2-Ke2  
H2-Ke6  
H2-T10:H2-T22:H2-T9  
H2-T23:H2-T9  
H2-T24  
H2afj  
H2afv:H2afz  
H2afx  
H2afy  
H2afy2  
H2afz:H2afv  
H3f3a:H3f3b  
H3f3b  
H47  
H6pd  
Habp4  
Hace1  
Hacl1  
Hadh  
Hadha  
Hadhb  
Hagh  
Haghl  
Hap1  
Hapln1  
Harbi1

Hars  
Hars2  
Has3  
Hat1  
Haus1  
Haus2  
Haus3  
Haus4  
Haus5:2310022K01Rik  
Haus7  
Haus8  
Hausp:Usp7  
Hax1  
Hba-a2  
Hbegf  
Hbp1  
Hbs11:mKIAA1038  
Hbxip  
Hccs  
Hcfc1  
Hcfc1r1  
Hcfc2  
Hck  
Hcn2  
Hcn3:AK177718  
Hcrtr1  
Hcrtr2  
Hdac1  
Hdac10  
Hdac11  
Hdac2  
Hdac3  
Hdac4  
Hdac5  
Hdac6  
HDAC7:Hdac7  
Hdac8  
Hdac9:Hdrpa  
Hddc2  
Hddc3



Hdgf  
Hdgfrp2  
Hdgfrp3  
Hdh:Htt  
Hdhd2  
Hdlbp  
Heatr1  
Heatr3  
Heatr5a  
Heatr5b  
Heatr6  
Heatr7a:AK211096  
Hebp1  
Hebp2  
Hectd1  
Hectd2  
Hectd3  
Hecw1  
Hecw2  
Helq:Hel308  
Helz  
Hemk1  
Hepacam  
Herc1  
Herc2:rjs  
Herc3:AK177772  
Herc4  
Herc6  
Herpud1  
Herpud2:AK043046  
Hes1  
Hes6  
Hexa  
Hexb  
Hexdc  
Hexim1  
Hexim2  
Hey1  
Hfm1  
Hgs

Hgsnat

Hiat1

Hiat1

Hibadh:AK042028

Hibch

Hic2

Hif1a

Hif1an

Higd2a

Hint1

Hint2

Hint3

Hip1

Hip1r

Hipk1

Hipk3:Mir1902

Hipk4

Hira

Hirip3

Hist1h1c

Hist1h2bc

Hist1h4i

Hist2h3c1

Hist3h2a

Hist3h2ba

Hivep1

Hivep2

Hivep3:mKIAA1555

Hk1

Hk2

Hlf

Hlrf

Hmbox1

Hmbs

Hmg1l1

Hmg20a

Hmg20b

Hmga1:Hmga1-rs1

Hmgb1

Hmgb2

Hmgb3  
Hmgcl  
Hmgcll1  
Hmgcr  
Hmgn1  
Hmgn2  
Hmgn3  
Hmgn5  
Hmgxb3:A630042L21Rik:mKIAA0194  
Hmgxb4  
Hmnr:IHABP  
Hmox2  
Hn1  
Hnf1a  
Hnmt  
Hnrnpa0  
Hnrnpa1  
Hnrnpa2b1:hnRNP A2/B1  
Hnrnpa3  
Hnrnpab  
Hnrnpc  
Hnrnpd  
Hnrnpf  
Hnrnph1:Hnrph1  
Hnrnph2  
Hnrnpk:Hnrpk  
Hnrnpl  
Hnrnpm:mKIAA4193  
Hnrnpr  
Hnrnpu:AK049600  
Hnrnpul1  
Hnrnpul2  
Hnrpdl  
Hnrpll  
Hnrpll:AK034420  
Homer1  
Homer2:vesl-2  
Homer3  
Homez  
Hook1

Hook2  
Hook3  
Hopx  
Hp1bp3  
Hpcal1  
Hpcal4  
Hprt  
Hps1:ep  
Hps3  
Hps4  
Hps5  
Hras1  
Hrasls  
Hrh3  
Hrk  
Hrsp12  
Hs2st1:Hs2st  
Hs3st1  
Hs3st2  
Hs3st5  
Hs6st1  
Hs6st2  
Hsbp1  
Hscb  
Hsd11b1  
Hsd17b10  
Hsd17b11  
Hsd17b12  
Hsd17b4  
Hsd17b7  
Hsd3b7  
Hsd1  
Hsd2  
Hsf1  
Hsf2  
Hsf2bp  
Hsf5  
Hsp90aa1  
Hsp90ab1

Hsp90b1  
Hspa12a:AK076668:AK076683  
Hspa13  
Hspa14  
Hspa14  
Hspa1b  
Hspa1l  
Hspa2  
Hspa4  
Hspa5  
Hspa8  
Hspa9  
Hspb11  
Hspbap1  
Hspb1  
Hspd1  
Hspe1  
Hsph1  
Htatip2  
Htatsf1  
Htr1a  
Htr2c  
Htr5a  
Htr7  
Htra1  
Htra2:HtrA2  
Hunk  
Huwe1:KIAA312:mKIAA0312  
Hvcn1  
Hyal2  
Hyi  
Hyou1  
lah1  
lars  
lars2  
lca1  
lca1l  
lcam5  
lck  
lcmt

lct1  
ld1  
ld2  
ld3  
ld4  
lde  
ldh1  
ldh2  
ldh3a  
ldh3b  
ldh3g  
ldi1  
ldo2  
lds  
ldua  
ler2  
ler3ip1  
ler5  
ler5l  
lfo1  
lfo2  
lfi203  
lfi204:Mnda  
lfi2711:ISG12a  
lfi2712a  
lfi30  
lfit2  
lfit3  
lfitm2  
lfnar1  
lfnar2  
lfngr2  
lfrd1  
lfrd2  
lft122:mFLJ00025  
lft140  
lft172  
lft20  
lft27  
lft46

Ift52  
Ift57  
Ift74  
Ift80  
Ift81:Cdv1R  
Ift88  
Igbp1  
Igbp1b  
Igdcc3  
Igf1  
Igf1r  
Igf2bp1  
Igf2r  
Igfbp2  
Igfbp3  
Igfbp4  
Igfbp5  
Igfbp1  
Ighmbp2  
Igsf1  
Igsf10  
Igsf21  
Igsf3  
Igsf5:Pcp4  
Igsf8  
Ik  
Ikbkap  
Ikkb:IKKbeta  
Ikbke  
Ikbkg  
Ikkb:IKKbeta  
Ikzf2  
Ikzf4  
Ikzf5  
Il10ra  
Il10rb  
Il11  
Il12rb2  
Il16:mKIAA4048  
Il17d

Il17ra  
Il18  
Il18bp  
Il1rap  
Il1rapl1  
Il1rapl2  
Il33  
Il34  
Il6ra  
Il6st  
Ildr2  
Ilf2  
Ilf3:AK185785  
Ilk  
Ilkap  
Ilvbl  
Imp11  
Imp12  
Imp21  
Immt  
Imp3  
Imp4  
Impa1  
Impact  
Impad1  
Impdh1  
Impdh2  
Impg2  
Ina  
Inadl  
Incenp  
Inf2  
Ing1  
Ing2  
Ing3  
Ing4  
Ing5  
Inha  
Inhba  
Inhbb  
Ino80



Ino80b  
Ino80c  
Ino80d  
Ino80e  
Inpp1  
Inpp4a:AK051424  
Inpp4b  
Inpp5a  
Inpp5b:INPP5P  
Inpp5e  
Inpp5f  
Inpp5j  
Inpp5k  
Insig1  
Insig2  
Insm1  
Insr  
Ints10  
Ints12  
Ints2  
Ints3  
Ints4  
Ints5  
Ints6:DQ722155  
Ints8  
Ints9  
Intu  
inv:Invs  
Ip6k1  
Ipcef1  
Ipmk:AK076771  
Ipo11  
Ipo13  
Ipo4:RanBP4  
Ipo5  
Ipo8  
Ipo9:Importin9  
Ippk  
Ipw  
Iqcb1

lqcc  
lqce  
lqcg  
lqcj:lqcj-schip1:Schip1  
lqgap1  
lqgap2  
lqsec1  
lqsec2  
lqsec3:mKIAA1110  
lqub  
Irak-2:Irak2  
Irak1:Mir718:IRAK1-S  
Irak1bp1  
Ireb2  
Irf2  
Irf2bp1  
Irf2bp2  
Irf3  
Irf9  
Irgq  
Irs1  
Irs2  
Isca1  
Isca2  
Isca3  
Iscu  
Isg20  
Isg20l2  
Islr2  
Ism1  
Isoc1  
Isoc2b  
Ispd  
Isy1  
Isyna1  
Itch  
Itfg1  
Itfg2  
Itfg3  
Itga10  
Itga2b:GPalpha IIb

ltga4  
ltga6  
ltga7  
ltga8  
ltgav  
ltgb1  
ltgb1bp1  
ltgb3  
ltgb6  
ltgb11  
ltih5  
ltm2a  
ltm2b  
ltm2c  
ltpa  
ltpk1  
ltpka  
ltpkb  
ltp1  
ltp2  
ltp1p1  
ltsn1:maa-13:ltsn  
ltsn2  
lvd  
lvns1abp  
lws1  
lzumo4  
Jag1  
Jagn1:AK034671  
Jak1  
Jak2  
Jakmip2  
Jakmip3  
Jam3  
Jarid2  
Jazf1  
Jdp2  
Jhdm1d  
Jkamp  
Jmjd1c:mKIAA1380

Jmjd4  
Jmjd5  
Jmjd6:mKIAA0585  
Jmjd8  
Josd1  
Josd2  
Jph1  
Jph3  
Jph4  
Jrk  
Jrkl  
JSAP2:Spag9:BC096410  
Jtb  
Jun  
Junb:AK006748  
Jund  
Jup  
Kalrn  
Kank3  
Kars  
Kat2a  
Kat2b  
Kat5  
Katna1  
Katnal1  
Katnal2  
Katnb1  
Kbtbd11  
Kbtbd2:BC027696  
Kbtbd3  
Kbtbd4  
Kbtbd5  
Kbtbd7  
Kbtbd8  
Kcmf1  
Kcna1  
Kcna4  
Kcna6  
Kcnab1  
Kcnab2

Kcnab3  
Kcnb1  
Kcnb2  
Kcnc1  
Kcnc2  
Kcnc3  
Kcnc4  
Kcnd2  
Kcnd3  
Kcnf1  
Kcng2  
Kcnh1  
Kcnh2  
Kcnh3  
Kcnh5  
Kcnh7:erg3  
Kcnip1  
Kcnip3  
Kcnip4  
Kcnj10  
Kcnj11  
Kcnj2  
Kcnj4  
Kcnj6  
Kcnj9:AK007011  
Kcnk1  
Kcnk10  
Kcnk12  
Kcnk2  
Kcnk3  
Kcnk4  
Kcnma1:Slo  
Kcnmb2:KCNMB2  
Kcnmb4  
Kcnn1  
Kcnn2:SK2  
Kcnn3:SK3  
Kcnq1ot1  
Kcnq2  
Kcnq3

Kcnq5

Kcns1

Kcns2

Kcns3

Kcnt1:mKIAA1422

Kcnt2

Kcnu1

Kcnv1

Kcp

Kctd1

Kctd10

Kctd12

Kctd12b

Kctd13

Kctd15

Kctd17

Kctd18

Kctd2

Kctd20

Kctd3

Kctd4

Kctd5

Kctd6

Kctd7

Kctd8

Kctd9

Kdelc1

Kdelc2

Kdelr1

Kdelr2

Kdm1a:mKIAA0601

Kdm1b

Kdm2a

Kdm2b

Kdm3a

Kdm3b:mKIAA1082

Kdm4a

Kdm4b

Kdm4c

Kdm4d

Kdm5a:Jarid1a  
Kdm5b  
Kdm5c  
Kdm5d:Smcy  
Kdm6a  
Kdm6b  
Kdsr  
Keap1  
Khdrbs1  
Khdrbs3:etoile  
Khyn:AK076856  
Khsrp  
Kiaa0028:Lars2  
Kiaa0146:2310008H04Rik  
Kiaa0528:5730419I09Rik:mKIAA0528  
Kiaa0907:2810403A07Rik  
Kiaa1152:1700020O03Rik  
KIAA1199 homolog:9930013L23Rik  
Kiaa1310:4632411B12Rik  
Kiaa1328:AW554918  
Kiaa1432:C030046E11Rik:mKIAA1432  
KIAA1440:Ints1  
Kiaa1456:6430573F11Rik  
Kiaa1737:2310044G17Rik  
Kiaa1797:BC057079  
Kidins220  
Kif13a  
Kif14  
Kif16b  
Kif17  
Kif1a  
Kif1b:KIF1B  
Kif1c  
Kif20a  
Kif20b  
Kif21a  
Kif21b  
Kif22  
Kif24  
Kif27

Kif2a  
Kif3a  
Kif3b  
Kif3c  
Kif5a  
Kif5b  
Kif5c  
Kif6  
Kif9  
Kifap3  
Kifc2  
Kifc3  
Kin  
Kirrel  
Kirrel3  
Kit:AK047175  
Kittl:Kittlg  
Kl  
Klc1  
Klc2  
Klc4  
Klf10  
Klf11  
Klf12:AK021307  
Klf13  
Klf16  
Klf2  
Klf3  
Klf4  
Klf5  
Klf6  
Klf7  
Klf8  
Klf9  
Klhdc1  
Klhdc10  
Klhdc2  
Klhdc3  
Klhdc4  
Klhdc5



Klhdc8a  
Klhdc8b  
Klhdc9  
Klh1  
Klh12  
Klh13  
Klh17  
Klh18  
Klh2  
Klh20  
Klh21  
Klh22  
Klh23  
Klh24  
Klh25  
Klh26  
Klh29  
Klh32  
Klh36  
Klh5:mKIAA4221  
Klh7  
Klh8  
Klh9  
Klk7  
Klk8  
Klra1  
Kndc1  
Kpna1  
Kpna2  
Kpna3  
Kpna4  
Kpna6  
Kpnb1  
Kptn  
KRAZ1:Zfp53  
Krb1  
Krc:BC099611  
Kremen1  
Krit1:BC099422  
Krr1

Krt10  
Krt12  
Krt222  
Krtcap2  
Ksr1  
Ktelc1:Poglut1  
Kti12  
Ktn1:KNT  
L1cam  
L2hgdh  
L3mbtl  
L3mbtl2  
L3mbtl3  
L3mbtl4  
I7Rn6  
Lace1  
Lactb  
Lactb2  
Lage3  
Lair1  
Lama2  
Lamb1-1:Lamb1  
Lamc1  
Lamp1  
Lamp2  
Lancl1  
Lancl2  
Lancl3  
Lap3  
Laptm4a  
Laptm4b  
Laptm5:AK171116  
Large  
Larp1  
Larp1b  
Larp1b  
Larp4  
Larp4b  
Larp6  
Larp7

Lars  
Las1l  
Lasp1  
Lass1:Gdf1  
Lass2  
Lass4  
Lass5  
Lass6  
Lat2  
Lats1  
Lats2  
Lbh  
Lca5  
Lck  
Lclat1  
Lcmt1  
Lcmt2  
Lcorl  
Lcp1  
Lcp2  
Lct  
Ldb1  
Ldb2  
Ldb3  
Ldha  
Ldhb  
Ldlr  
Ldoc1l  
Lekr1  
Lemd2  
Lemd3  
Leng1  
Leng8  
Leng9  
Leo1  
Lepre1  
Leprel2  
Leprel4  
Leprot  
Leprotl1

Letm1  
Letm2  
Letmd1  
Lgals3bp  
Lgi1:AK035873  
Lgi2  
Lgi3  
Lgmn  
Lgr4  
Lgr5  
Lgtn:Eif2d  
Lhfp  
Lhfp12  
Lhfp13  
Lhfp14  
Lhpp  
Lhx2  
Lhx6  
Lhx9  
Lias  
Lifr  
Lig1  
Lig3  
Lig4  
Limch1  
Limd1:limd1  
Limd2  
Lime1  
Limk1  
Limk2  
Lims1  
Lin37  
Lin52  
Lin54:mKIAA2037  
Lin7a  
Lin7b  
Lin7c  
Lingo1  
Lingo2  
Lingo3

Lins2:Lins

Lipa

Lipc

Lipe

Lipg

Lipo1:A1747699

Lipt1

Lipt2

Litaf

Lix1

Lix1l

Llg1

Llph

Lman1

Lman2

Lman2l

Lmbr1

Lmbr1l

Lmbrd1

Lmf1

Lmf2

Lmna

Lmnb1:AK079263

Lmnb2

Lmo1

Lmo2

Lmo3

Lmo4

Lmo7

Lmod3

Lmtk2

Lnp:mKIAA1715

Lnpep:AK137492

Lnx1

LOC100034739

LOC100042049

LOC100316870

LOC106740

Loh12cr1

Lonp1

Lonp2  
Lonrf1  
Lonrf2  
Lor  
Loxl2  
Loxl3:Lor2  
Lpar2  
Lpar4  
Lpar6  
Lpcat1  
Lpcat2  
Lpcat2b  
Lpcat3  
Lpcat4  
LPCAT4:Mboat2  
Lpgat1  
Lphn1  
Lphn2  
Lphn3  
Lpin1  
Lpin2  
Lpl:AK170106  
Lpp  
Lppr2:BC018242  
Lppr4:D3Bwg0562e  
Lrba:Lba  
Lrch1  
Lrch2  
Lrch3  
Lrch4  
Lrfn1  
Lrfn2  
Lrfn3  
Lrfn4  
Lrfn5  
Lrig1  
Lrig2:AK040112:mKIAA0806  
Lrp1  
Lrp10  
Lrp11

Lrp12  
Lrp1b  
Lrp3  
Lrp4  
Lrp6  
Lrp8  
Lrpap1  
Lrpprc  
Lrrc14  
Lrrc16a  
Lrrc16b  
Lrrc20  
Lrrc24  
Lrrc27  
Lrrc28  
Lrrc29  
Lrrc3  
Lrrc33  
Lrrc39  
Lrrc3b  
Lrrc4  
Lrrc40  
Lrrc41  
Lrrc42  
Lrrc45  
Lrrc47  
Lrrc49  
Lrrc4b  
Lrrc4c:AK052157  
Lrrc51  
Lrrc55  
Lrrc56  
Lrrc57  
Lrrc58  
Lrrc59  
Lrrc61  
Lrrc67  
Lrrc68  
Lrrc7  
Lrrc8a

Lrrc8d

Lrrcc1

Lrrfip1

Lrrfip2

Lrriq3

Lrrk2

Lrrn1

Lrrn2

Lrrn3

Lrrn4cl

Lrrtm1

Lrrtm2

Lrrtm3

Lrrtm4

Lrsam1

Lrtm1

Lrwd1

Lsamp:AK082117

Lsg1

Lsm1

Lsm10

Lsm11

Lsm12

Lsm14a

Lsm14b

Lsm2:SmX5

Lsm3

Lsm4

Lsm5

Lsm6

Lsm7

Lsmd1

Lsr

Lss

Lst1:B144

Lta4h

Ltbp2

Ltbp3

Ltbp4

Ltk



Ltv1  
Luc7l  
Luc7l2  
Luc7l3  
Luzp1  
Luzp2  
Lxn  
Ly6e  
Ly6h  
Ly86  
Ly96  
Lyar  
Lyl1  
Lynx1  
Lypd1  
Lypd6  
Lypd6b  
Lypla1  
Lypla2  
Lyplal1  
Lyrml  
Lyrml2  
Lyrml4  
Lyrml5  
Lyrml7  
Lysmd1  
Lysmd2  
Lysmd3  
Lysmd4  
Lyst  
Lzic  
Lztl1  
Lztr1  
Lzts2  
M6pr  
Macf1  
Macrod2  
Mad1l1:Mad1  
Mad2l1  
Mad2l1bp

Mad2l2  
Maea  
Maf  
Maf1  
Mafb  
Mafg  
Mafk  
Maged2  
Magee1  
Magee2  
Mageh1  
Magel2  
Magi1  
Magi2:AK028130  
Magi3  
Magoh  
Magohb  
Magt1  
Mak  
Mak16  
Mal2  
Malat1  
Malt1  
Maml2  
Man1a  
Man1a2  
Man1b1  
Man1c1  
Man2a1  
Man2a2  
Man2b1  
Man2c1  
Manba  
Manbal  
Manea  
Maneal  
Manf  
Mansc1  
Maoa  
Maob

Map1lc3a  
Map1lc3b  
Map1s:Map1s  
Map2k1  
Map2k2  
Map2k3  
Map2k4  
Map2k5:Mek5  
Map2k6  
Map2k7  
Map3k1  
Map3k10  
Map3k12  
Map3k13  
Map3k2  
Map3k3  
Map3k4  
Map3k5  
Map3k6:ASK2  
Map3k7  
Map3k9  
Map4k1  
Map4k2  
Map4k3  
Map4k4  
Map4k5  
Map6d1  
Mapk1  
Mapk10  
Mapk11  
Mapk14  
Mapk15  
Mapk1ip1  
Mapk1ip1l  
Mapk3  
Mapk4  
Mapk6  
Mapk7  
Mapk8:Mapk10:jnk1  
Mapk8ip1

Mapk8ip2  
Mapk8ip3:Jsap1  
Mapk9:Jnk2  
Mapkap1  
Mapkapk2  
Mapkapk5  
Mapkbp1  
Mapksp1  
Mapre1  
Mapre2:AK088734  
Mapre3  
Mapt  
Marcks:AK017779  
Marcks1  
Marcks1-ps4  
Mark1  
Mark2  
Mark3  
Mars  
Mars2  
Mas1  
Masp1  
Mast1  
Mast2  
Mast3  
Mast4:AK037351  
Mat2a  
Mat2b:MAT2B  
Matk  
Matn2  
Matr3  
Mau2:Kiaa0892:mKIAA0892  
Max  
Maz  
Mbd1  
Mbd2  
Mbd3  
Mbd4  
Mbd5  
Mbd6

Mbip  
Mblac1  
Mblac2:2900024O10Rik  
Mbn1:mKIAA0428  
Mbnl2  
Mboat1  
Mboat7  
Mbp:AK195683  
Mbt1  
Mbtps1  
Mbtps2:Yy2  
Mc4r  
Mcart1:9130208E07Rik  
Mcart6  
Mcat  
Mcc  
Mccc1:Mcca  
Mccc2  
Mcee  
Mcf2  
Mcf2l  
Mcf2d  
Mchr1  
Mcl1  
Mcm2  
Mcm3ap  
Mcm4  
Mcm6  
Mcm7  
Mcmbp:1110007A13Rik  
Mcoln1  
Mcrs1:MSP58  
Mctp1  
Mcts1  
Mcts2  
Mdc1  
Mdfic  
Mdga1  
Mdga2  
Mdh1

Mdh2  
Mdk  
Mdm1  
Mdm2  
Mdm4:Mdmx  
Mdn1:AK037999  
Mdp1  
Me1  
Me2  
Me3  
Mea1  
Meaf6:2310005N01Rik  
Mecom  
Mecp2  
Mecr  
Med1  
Med10  
Med11  
Med12l  
Med13  
Med13l  
Med14  
Med15:Pcqap  
Med16:AK181029  
Med17  
Med18  
Med19  
Med20  
Med21  
Med22  
Med23  
Med24  
Med25  
Med26  
Med27  
Med28  
Med29  
Med30  
Med31  
Med4

Med6  
Med7  
Med8  
Med9  
Mef2a  
Mef2c:AK043267  
Mef2d  
Meg3:Mir1906-1  
Meg3:Mir770  
Megf10  
Megf11:mKIAA1781  
Megf8  
Megf9  
Meig1  
Meis2:meis2a  
Meis3  
Melk:BC055065  
Memo1  
Men1  
Mepce  
Mesdc1  
Mesdc2  
Mest  
Met  
Metap1  
Metap1d  
Metap2  
Metrnl  
Mett10d  
Mett11d1  
Mett5d1  
Mettl1  
Mettl10  
Mettl11a  
Mettl13:mKIAA0859  
Mettl14  
Mettl2  
Mettl3  
Mettl5  
Mettl6

Mettl7a1  
Mettl8  
Mettl9  
Mex3a  
Mex3b  
Mex3c  
Mex3d  
Mfap1a  
Mfap2  
Mfap3  
Mfap3l  
Mff  
Mfge8  
Mfhas1  
mFLJ00128:Arhgef40  
mFLJ00163:Maged1  
mFLJ00277:ORF61  
Mfn1  
Mfn2  
Mfsd1  
Mfsd10  
Mfsd11:AK007898  
Mfsd2a  
Mfsd3  
Mfsd4  
Mfsd5  
Mfsd6  
Mfsd7b  
Mfsd8  
Mfsd9  
Mga:mKIAA4252  
Mgat1  
Mgat2  
Mgat3  
Mgat4a  
Mgat4b  
Mgat4c  
Mgat5  
Mgat5b  
Mgea5:BC147260



Mgl  
Mgrn1:mKIAA0544  
Mgst3  
Mia1  
Miat  
Mib1:AK079855  
Mib2:dyslike  
Mical1  
Mical2  
Mical3  
Mical3  
Micall1:mKIAA1668  
Micall2  
Mid1:Fxy  
Mid1ip1  
Mid2  
Midn  
Mier1  
Mier2  
Mier3  
Mif  
Mif1  
Mif4gd  
Miip:D4Wsu114e  
mimitin:Ndufaf2  
Mina  
Mink1  
Minpp1  
Mios  
Mipep  
Mir1192  
Mir153  
Mir1931  
Mir682  
Mir684-1  
Mir684-1  
Mir684-1  
Mir684-1  
Mir703

382:Mir134:Mir668:Mir485:Mir412:Mir369:Mir410

Mirlet7b  
Mis12  
Mitd1  
Mki67  
Mki67ip  
mKIAA0010:Ube3c  
mKIAA0097:Ckap5  
mKIAA0184:Dip2a  
mKIAA0215:Phf16  
mKIAA0241:Avl9  
mKIAA0268:Mia3  
mKIAA0281:Elmo1  
mKIAA0297:Tecpr2  
mKIAA0358:Madd  
mKIAA0376:Specc1l  
mKIAA0480:Cep350  
mKIAA0558:Cacna2d2  
mKIAA0650:Smchd1:AK162806  
mKIAA0694:Dock10  
mKIAA0696:Fbxw11  
mKIAA0701:Uhrf1bp1l  
mKIAA0716:Dock4  
mKIAA0769:Fchsd2  
mKIAA0787:Camkk2  
mKIAA0804:Vps8  
mKIAA0847:Cdan1  
mKIAA0878:Rhobtb3  
mKIAA0887:Faf2  
mKIAA0896:Ubr5  
mKIAA0897:Ppfia4  
mKIAA0899:Ap2a2  
mKIAA0946:Zdhc17  
mKIAA0961:Zfp30  
mKIAA0968:Camk2a  
mKIAA1076:AK140234  
mKIAA1122:Smarcad1  
mKIAA1337:Ptchd2  
mKIAA1376:Arrdc3  
mKIAA1386:Ankib1  
mKIAA1417:lbtk

mKIAA1549:D630045J12Rik

mKIAA1600:Fam160b1

mKIAA1605:Gba2

mKIAA1612:Ogfod1

mKIAA1673

mKIAA1757:Setd5

mKIAA1796:Fam13c

mKIAA1823:Phf6

mKIAA1994:Tsc22d1

mKIAA1997:Dync2h1:Dnchc2

mKIAA4114:Picalm

mKIAA4123:Btrc:Fbxw11

mKIAA4155:Usp4

mKIAA4170:Mypn

Mkks

Mkl1

Mkl2

Mkln1

Mknk1

Mknk2:Mnk2

Mkrn1

Mkrn2

Mkrn3

Mlc1

Mlec

Mlf1

Mlf1ip

Mlf2

Mlh1

Mlh3

Mkl

MII1:mKIAA4050:All-1

MII2

MII3:mKIAA1506

MII5:AK154113

MII1

MII10:mAF10

MII11

MII3

MII4

Mlit6  
mlr2:Lcor  
Mlst8  
Mlx  
Mlxip  
Mmaa  
Mmab  
Mmachc  
Mmadhc  
Mmd:BC106170:Paqr11  
Mmd2  
Mme  
Mmgt1  
Mmgt2  
Mmp14  
Mmp15  
Mmp17  
Mmp2  
Mmp21  
Mmp24  
Mms19  
Mn1  
Mnat1  
Mnd1  
Mndal  
Mns1  
Mnt  
Mobkl1a:AK046278  
Mobkl2a  
Mobkl3:AK165532  
Mocs2  
Mocs3  
Mogs  
Mon1a  
Mon1b  
Mon2  
Morc1:Morc  
Morc2a  
Morc3:mKIAA0136  
Morc4

Morf4l1:MRG15

Morf4l2

Morn1

Morn2:Mopt

Morn4

Mosc2

Mospd1

Mospd2

Mov10

Mpdu1:Supl15h

Mpdz

Mpeg1

Mpg

Mphosph10

Mphosph6

Mphosph8

Mphosph9

Mpnd

Mpp1

Mpp2

Mpp3

Mpp4:mDLG6A

Mpp5

Mpp6

Mpp7

Mppe1

Mpped1

Mpped2:EF410088

Mprip

Mpv17:Gtf3c2:mKIAA0011

Mpv17l

Mpv17l2:Fksg24

Mpzl1

Mras

Mrc1

Mre11a

Mrfap1

Mrgpre

Mri1

Mrm1

Mro

MRP-S2:Mrps2

Mrp63

Mrpl1

Mrpl10

Mrpl11

Mrpl12

Mrpl13:MRPL13

Mrpl14

Mrpl15

Mrpl16

Mrpl17

Mrpl18

Mrpl19

Mrpl2

Mrpl20

Mrpl21

Mrpl22

Mrpl23

Mrpl24

Mrpl27

Mrpl28

Mrpl3

Mrpl30

Mrpl32

Mrpl33:MRPL33

Mrpl34

Mrpl35

Mrpl36

Mrpl37

Mrpl38

Mrpl38

Mrpl39

Mrpl4:MRPL4

Mrpl40

Mrpl41

Mrpl42

Mrpl43

Mrpl44

Mrpl45

Mrpl46  
Mrpl47  
Mrpl48  
Mrpl49  
Mrpl50  
Mrpl51:bMRP64  
Mrpl52  
Mrpl54  
Mrpl55  
Mrpl9  
Mrps10  
Mrps11:MRPS11  
Mrps12  
Mrps14  
Mrps15  
Mrps16  
Mrps17:MRPS17  
Mrps18a  
Mrps18b  
Mrps18c  
Mrps21  
Mrps22  
Mrps23  
Mrps24  
Mrps25  
Mrps26  
Mrps27  
Mrps28  
Mrps30  
Mrps31  
Mrps33  
Mrps35  
Mrps36  
Mrps5  
Mrps6  
Mrps7  
Mrps9  
Mrrf  
Mrs2  
Mrto4

Msc

Msh2

Msh3

Msh4

Msh6

Msi2:LOC100504473:msi2

Msl1

Msl2

Msl3

Msl3l2

Msn

Msra

Msrb2

Msrb3

Mst1r

Msto1

mszf37:Zfp961:BC049349

mt-Nd4

Mt1

Mt2

Mt3

mt3-mmp:Mmp16

Mta1

Mta2

Mta3

Mtap

Mtap1a

Mtap1b

Mtap2

Mtap4:Map4

Mtap6

Mtap7

Mtap7d1

Mtap7d2

Mtap9

Mtch1:AK189633:AK198904:AK189748

Mtch2

Mtcp1

Mtcp1:AK142198

Mtdh



Mterf:AK020320

Mterfd1

Mterfd2

Mterfd3

Mtf1

Mtf2:mPcl2

Mtfmt

Mtfp1

Mtfr1

Mtg1

Mthfd1

Mthfd1l

Mthfd2

Mthfd2l

Mthfr

Mthfs

Mthfsd

mThy28:Thyn1

Mtif2:AK051928

Mtif3

Mtm1

Mtmr1

Mtmr10

Mtmr12:mKIAA1682

Mtmr14

Mtmr2

Mtmr3:mKIAA0371

Mtmr4

Mtmr6

Mtmr7

Mtmr9

Mto1

Mtor

Mtpap

Mtpn

MtPolB:Polg2

Mtrf1

Mtrf1l

Mtrr

Mtss1:mKIAA0429

Mtss11  
Mtus1  
Mtus2:C130038G02Rik  
Mtvr2:C184:Sssca1  
Mtx1  
Mtx2  
Mtx3  
Muc15  
Mudeng  
Mul1  
Mum1  
Mus81  
Mut  
Muted  
Mutyh  
Mvd  
Mvk  
Mvp  
Mxd1  
Mxd4  
Mxi1  
Mxra7  
Mxra8:asp3  
Myadm  
Myadml2  
Mybbp1a  
Mybpc2  
Myc  
Mycbp  
Mycbp2:Phr1  
Mycl1  
Mycn  
Myef2  
Myeov2  
Myf6  
Myg1  
Myh10:mKIAA3005  
Myh6  
Myh7  
Myh9

My112b

My14

My16

My16b

My1ip

My1k4

My1nn

Myo15

Myo16

Myo18a

Myo18b

Myo19

Myo1b

Myo1c

Myo1h

Myo5b

Myo5b:Myo5a

Myo6

Myo7a

Myo9a

Myo9b

Myof:mKIAA1207

Myom1

Myom2

Myoz3

Mypop

Myrip

Mysm1

Myst1

Myst2

Myst3

Myst4

Myt1

Myt11

Mzf1

Mzt1:2410129H14Rik

Mzt2

N28178:AK138412

N4bp1

N4bp2

N4bp211

N4bp212

N4bp3

N6amt1

N6amt2

Naa10

Naa15

Naa16

Naa20

Naa25

Naa30

Naa35

Naa38

Naa40:AK209302

Naa50

Nab1

Nab2

Naca

Nacad

Nacc1

Nacc2

Nadk

Nae1

Naf1

Naga

Nagk:AK051368

Naglu

Nalcn

Nampt

Nanos1

Nanos3

Nanp

Nans

Nap111

Nap112

Nap113

Nap114

Nap115

Napa

Napb:AK048037

Napepld  
Napg  
Narf  
Narfl  
Nars  
Nars2  
Nasp  
Nat10  
Nat14  
Nat15  
Nat6:Hyal1  
Nat8l  
Nat9  
Nav1  
Nav2:AK088944  
Nav3  
Nbas  
Nbea  
Nbeal1:AK041465  
Nbeal2  
Nbl1  
Nbr1  
Ncald  
Ncam1  
Ncam2  
Ncan  
Ncapd2  
Ncapd3  
Ncapg  
Ncapg2:Mtb  
Ncaph2:AK012142  
Ncbp1  
Ncbp2  
Ncdn  
Nceh1  
Nck1  
Nck2  
Nckap1  
Nckap1l  
Nckap5

Nckap5l  
Nckipsd:AK217931  
Ncl  
Ncln  
Ncoa1  
Ncoa2  
Ncoa3  
Ncoa4  
Ncoa5  
Ncoa6  
Ncoa7  
Ncor1  
Ncor2  
Ncrna00086  
Ncs1  
Ncstn  
Ndel1  
Ndfip1  
Ndfip2:N4wbp5A  
Ndn  
Ndnl2  
Ndor1  
Ndr1  
Ndr2  
Ndr3:Ndr3  
Ndr4  
Ndst1  
Ndst2  
Ndst3  
Ndst4  
Ndufa1  
Ndufa10  
Ndufa11  
Ndufa12  
Ndufa13  
Ndufa2  
Ndufa3  
Ndufa3  
Ndufa4  
Ndufa5

Ndufa6  
Ndufa7  
Ndufa8  
Ndufa9  
Ndufab1  
Ndufaf1  
Ndufaf3  
Ndufaf4  
Ndufb10  
Ndufb11  
Ndufb2  
Ndufb3  
Ndufb4  
Ndufb5  
Ndufb6  
Ndufb7  
Ndufb8  
Ndufb9  
Ndufc1  
Ndufc2  
Ndufs1  
Ndufs2  
Ndufs3  
Ndufs4  
Ndufs5  
Ndufs6  
Ndufs7  
Ndufs8  
Ndufv1  
Ndufv2  
Ndufv3  
Nebi  
Necab1  
Necab2  
Necab3  
Necap1:mFLJ00061  
Necap2  
Nedd4  
Nedd4l:mKIAA0439  
Nedd8

Nedd9  
Nefh  
Nefl  
Nefm  
Negr1  
Neil1  
Nek3  
Nek4  
Nek6  
Nek7  
Nek9  
Nelf  
Nell1  
Nell2  
Nenf  
Neo1  
Nes  
Net1  
Neto1  
Neto2  
Neu1  
Neur1a  
Neur1b  
Neur4  
Neurod1  
Neurod2  
Neurod6  
Nexn  
Nf1  
Nf2  
Nfasc  
Nfat5  
Nfatc2  
Nfatc2ip  
Nfatc3  
Nfe2l1  
Nfe2l3  
Nfia  
Nfib  
Nfic



Nfil3  
Nfix  
Nfkb1  
Nfkb2  
Nfkbia  
Nfkbib  
Nfkbid  
Nfkbil1  
Nfkbiz:IkappaB-zeta  
Nfrkb  
Nfs1  
Nfu1  
Nfx1  
Nfxl1  
Nfya  
Nfyb  
Nfyc  
Ngdn  
Ngef  
Ngfrap1  
Ngly1  
Ngrn  
NHE8:Slc9a8  
Nhej1  
Nhirc1  
Nhirc2  
Nhp2  
Nhp2l1  
Nhsl1:AK041760  
Nhsl2  
Nicn1  
Nid2  
Nif3l1  
Nin:mKIAA1565  
Ninj1  
Ninl  
Nip7  
Nipa1  
Nipa2  
Nipal2:Npal2

Nipal3  
Nipbl  
Nipsnap1  
Nipsnap3b  
Nisch:mKIAA0975  
Nit1  
Nit2  
Nkain1  
Nkain2  
Nkain3  
Nkain4  
Nkap  
Nkapl  
Nkd1  
Nkd2  
Nkiras1  
Nkrf  
Nktr  
Nkx2-1  
Nkx3-1  
Nle1  
Nlgn1  
Nlgn2  
Nlgn3  
Nlk  
Nln  
Nlrx1  
Nmb  
Nmd3  
Nme1  
Nme2  
Nme3  
Nme4  
Nme5  
Nme6  
Nme7  
Nmi  
Nmnat1  
Nmnat2:mKIAA0479  
Nmral1

Nmt1  
Nmt2  
Nnmt  
Nnt  
Nob1  
Noc3l  
Noc4l  
Nog  
Nol10  
Nol11  
Nol12  
Nol3  
Nol4  
Nol6  
Nol7  
Nol8  
Nol9  
Nolc1  
Nom1  
Nomo1  
Nono  
Nop10  
Nop14  
Nop16  
Nop2  
Nop56  
Nop58  
Nos1ap  
Nosip  
Notch2  
Nov  
Nova1  
Nova2  
Noxo1  
Npas1  
Npas2  
Npas3  
Npas4  
Npat  
Npbwr1

Npc1  
Npc2  
Npdc1  
Npepps  
Nphp1  
Nphp3:Acad11  
Nphp4  
Nphs1  
Nploc4  
Npm1  
Npm3  
Npm3-ps1  
Nppa  
Nppc  
Npr2  
Npr3  
Nprl2  
Nprl3:Mare  
Nptn  
Nptx1  
Nptx2  
Nptxr:Npcd:Cbx6  
Npy  
Npy1r  
Npy2r  
Npy5r  
Nqo1  
Nqo2  
Nr1d1  
Nr1d2  
Nr1h2  
Nr2c1:AK029258  
Nr2c2:mKIAA4145  
Nr2c2ap  
Nr2e1  
Nr2f1  
Nr2f2  
Nr2f6  
Nr3c1  
Nr3c2

Nr4a1  
Nr4a2  
Nr4a3  
Nr6a1  
Nradd  
Nrarp  
Nras  
Nras:Kras  
Nrbf2  
Nrbp1  
Nrbp2  
Nrcam:NrCAM  
Nrd1:Mir761:AK138781  
Nrf1  
Nrg2  
Nrg3  
Nrgn  
Nrip1  
Nrip3  
Nrm  
Nrn1  
Nrp  
Nrp1:Mir1903  
Nrp2  
Nrsn1  
Nrsn2  
Nrtn  
Nrxn1:mKIAA0578:AK139280  
Nrxn2  
Nrxn3  
Nsa2  
Nsd1:AK053386  
Nsdhl  
Nsf:AK160502  
Nsfl1c  
Nsg1  
Nsg2  
Nsl1  
Nsmaf  
Nsmce1

Nsmce2  
Nsmce4a  
Nsun2  
Nsun4  
Nsun5  
Nsun6  
Nsun7  
Nt5c  
Nt5c2  
Nt5c3  
Nt5c3l  
Nt5dc1  
Nt5dc3  
Nt5e  
Nt5m:Dnt2  
Ntan1  
Ntf3  
Nthl1  
Ntm  
Ntn3  
Ntng1:AK053689  
Ntng2:mKIAA1857  
Ntpcr  
Ntrk2  
Ntrk3  
Nts  
Ntsr1  
Ntsr2  
Nuak1  
Nub1  
Nubp1  
Nubp2  
Nubpl  
Nucb1  
Nucb2  
Nucks1  
Nudc  
Nudcd1  
Nudcd2  
Nudcd3:mKIAA1068

Nudt1  
Nudt10  
Nudt11  
Nudt13  
Nudt14  
Nudt16  
Nudt16l1  
Nudt17  
Nudt18  
Nudt19  
Nudt2  
Nudt21  
Nudt22  
Nudt3  
Nudt4  
Nudt6  
Nudt8  
Nudt9  
Nufip1  
Nufip2  
Nupa1  
Nupbl  
Nup107  
Nup133  
Nup153  
Nup155  
Nup160:Gtl-13  
Nup188  
Nup205:mKIAA0225  
Nup210  
Nup214  
Nup35  
Nup37  
Nup43  
Nup50  
Nup54  
Nup62  
Nup85  
Nup88  
Nup93

Nup98  
Nupl1:mKIAA0410  
Nus1  
Nusap1  
Nutf2  
Nvl  
Nxf1  
Nxn  
Nxph1:AK139424  
Nxt1  
Nxt2  
Nynrin  
Oas1c  
Oat  
Oaz1:AK087942:Mir1982  
Oaz2-ps:Oaz2  
Obfc1  
Obfc2a:Nabp1  
Obfc2b  
Obscn  
Obsl1  
Oca2  
Ocel1  
Ociad1  
Ociad2  
Ocr1  
Odc1  
Odf2  
Odz1:ten-m1  
Odz2:ten-m2  
Odz3:ten-m3  
Odz4:ten-m4  
Ofd1  
Ogdh:mKIAA4192  
Ogfod2  
Ogfr  
Ogfrl1  
Ogg1  
Ogt  
Ola1



Olfm1  
Olfm2  
Olfm3  
Olfml2b  
Olf1344  
Olf613  
Olf856-ps1  
Olig1  
Oma1  
Omg  
Onecut2  
Opa1  
Opa3  
Opal1:D19Wsu162e  
Opcml  
Ophn1  
Opn3  
Opr1  
Optn  
Orai1  
Orai2  
Orai3  
Oraov1  
Orc2  
Orc3:Orc3l  
Orc4:MuORC4  
Orc5  
Orc6  
ORF19  
Ormdl1  
Ormdl2  
Ormdl3  
Os9  
Osbp  
Osbp2  
Osbpl10  
Osbpl11  
Osbpl1a  
Osbpl2  
Osbpl3

Osbpl5:Obph1

Osbpl6:mKIAA4128

Osbpl7

Osbpl8

Osbpl9

Oscp1:OSCP1

Osgep

Osgepl1

Osgin2

Osr1

Osr1

Ost4

Ostc

Ostf1

Ostm1

OTTMUSG00000016325

Otub1

Otub2

Otud1

Otud4

Otud5

Otud6b

Otud7a

Otud7b

Ovgp1

Ovol1

Oxa1l

Oxct1

Oxnad1

Oxr1

Oxsr1

P2rx4:AK153427

P2ry14:AK157216

P4ha1

P4ha2

P4ha3

P4hb

P4htm

p62:Gtf2h1

Pa2g4

Pabpc1:Pabpc2

Pabpc4:Gm12612

Pabpn1

Pacrg

Pacs1

Pacs2:mKIAA0602

Pacsin1

Pacsin2

Pacsin3

Paf1

Pafah1b1

Pafah1b2:AK011326

Pafah1b3

Pafah2

Pag1

Paics

Paip1

Paip2

Paip2b

Pak1ip1

Pak2

Pak2:Pak1

Pak3

Pak4

Pak6

Pak7

Palld

Palm

Palm2:Akap2

Palm3

Palmd

Pam

Pam16

Pamr1

Pan3

Pank1

Pank2

Pank3

Pank4

Panx1

Panx2  
Paox:Pao  
Papd4  
Papd5  
Papd7  
PAPK-A:Stradb  
Papola  
Papolg  
Papss1  
Paqr3  
Paqr4  
Paqr7  
Paqr8  
Paqr9  
Pard3  
Pard3b  
Pard6a  
Pard6g  
Parg  
Park2  
Park7:dj-1  
Parl  
Parm1  
Parn  
Parp1  
Parp11  
Parp12  
Parp16  
Parp2  
Parp6  
Parp8  
Pars2  
Parva  
Patl1  
Patz1:mazr  
Paxip1  
Pbld2  
Pbrm1  
Pbx1:Pbx3  
Pbx1:Pbx3

Pbx2  
Pbx4  
Pbxip1  
Pcbd1  
Pcbd2  
Pcbp1  
Pcbp2  
Pcbp3  
Pcbp4  
Pcca  
Pccb  
Pcdh10  
Pcdh15:av  
Pcdh17  
Pcdh18  
Pcdh19  
Pcdh20  
Pcdh7  
Pcdh8  
Pcdh9

a3:Pcdhgb1:Pcdhga4:Pcdhgb2:Pcdhga5:Pcdhga6:Pcdhga7:Pcdhgb4:Pcdhga8:Pcdhgb5:Pcdhga9:Pcdhgb6:Pcdhga10:Pcdh

Pcdhb10  
Pcdhb11  
Pcdhb12  
Pcdhb13  
Pcdhb14  
Pcdhb15  
Pcdhb16  
Pcdhb17  
Pcdhb18  
Pcdhb19  
Pcdhb20  
Pcdhb3  
Pcdhb4  
Pcdhb5  
Pcdhb7  
Pcdhb9  
Pcf11  
Pcgf1  
Pcgf2

Pcgf3  
Pcgf5:AK080025  
Pcgf6:mMBLR  
Pcid2  
Pcif1  
Pck2  
Pclo  
pcm-1:Pcm1  
Pcmt1  
Pcmtd1  
Pcmtd2  
Pcna  
Pcnp  
Pcnt  
Pcnx  
Pcnxl2  
Pcnxl3  
Pcolce2  
Pcsk1  
Pcsk1n  
Pcsk2  
Pcsk5  
Pcsk7  
Pcx  
Pcyox1  
Pcyox1l  
Pcyt1a  
Pcyt1b  
Pcyt2  
Pdap1  
Pdcd10  
Pdcd11:mKIAA0185  
Pdcd2  
Pdcd2l  
Pdcd4  
Pdcd5  
Pdcd6  
Pdcd6ip  
Pdcd7  
Pdcl

Pdcl3  
Pddc1  
Pde10a  
Pde12  
Pde1a  
Pde1b  
Pde1c  
Pde2a  
Pde3b  
Pde4a  
Pde4b  
Pde4d  
Pde4dip  
Pde6a  
Pde6d  
Pde7a  
Pde8a  
Pde8b  
Pde9a  
Pdf  
Pdgfa  
Pdgfb  
Pdgfc  
Pdha1  
Pdhb  
Pdhx  
Pdia3  
Pdia5  
Pdia6  
Pdik1l  
Pdk1  
Pdk3  
Pdlim1  
Pdlim5  
Pdlim7  
Pdp1  
Pdp2  
Pdpk1  
Pdpn  
Pdpr:mKIAA1990

Pdrg1  
Pds5a  
Pds5b  
Pdss1  
Pdss2  
Pdxdc1  
Pdxk  
Pdxp  
Pdzd11  
Pdzd2:AK159017  
Pdzd4  
Pdzd8  
Pdzd9:4930408O21Rik  
Pdzk1  
Pdzn3:AK164098:Semcap3  
Pdzn4  
Pea15a  
Pebp1  
Peci  
Pecr  
Pef1  
Peg13  
Peg3  
Peg5  
Peli1  
Pelo:Pelota  
Pelp1  
Pemt  
Penk  
Peo1  
Pepd  
Per1  
Per2  
Per3  
Perp  
Pes1  
Pet112l  
Pex1  
Pex10  
Pex11b



Pex11g:Pex11c

Pex12

Pex13

Pex14

Pex16

Pex19

Pex26

Pex3

Pex5

Pex5l

Pex6

Pex7

Pfas

Pfdn1

Pfdn2

Pfdn4

Pfdn5

Pfkfb2

Pfkfb3

Pfkfb4

Pfkl

Pfkm

Pfkp:AK032401

Pfn1

Pfn2

Pfn4

Pgam1

Pgam5

Pgap2:Frag1

Pgap3

Pgbd5

Pgd

Pgf

Pggt1b

Pgk1

Pgls

Pgm1

Pgm2

Pgm2l1

Pgm3

Pgp  
Pgpep1  
Pgr  
Pgrmc1  
Pgrmc2  
Pgs1  
Phactr1  
Phactr2  
Phactr3  
Phax  
Phb  
Phb2  
Phc1  
Phc2:Edr2 p36  
Phc3  
Phf10  
Phf12  
Phf13  
Phf14  
Phf15  
Phf17  
Phf2  
Phf20  
Phf20l1  
Phf21a  
Phf23  
Phf3  
Phf5a  
Phf7  
Phf8  
Phgdh  
Phip:ndrp  
Phka2  
Phkb  
Phkg1  
Phkg2  
Phlda1  
Phlda3  
Phldb1  
Phldb2

Phlpp1  
Phlpp2  
Phospho2  
Phpt1  
Phrf1  
Phtf1  
Phtf2  
Phxr1  
Phxr4  
Phyh  
Phyhd1  
Phyhip  
Phyhipl  
Pi4k2a  
Pi4k2b  
Pi4ka:Pi4ca  
Pi4kb  
Pias1  
Pias2:Miz1  
Pias3  
Pias4:PIAS-gamma  
Pibf1  
Pick1  
Pid1:5033414K04Rik  
Pigb:AK034716  
Pigc  
Pigf  
Pigh:AK033827  
Pigk  
Pigl  
Pigm  
Pigo  
Pigp  
Pigq:mGpi1  
Pigr  
Pigs  
Pigt  
Pigu  
Pigv  
Pigx

Pigy  
Pigyl  
Pih1d1  
Pih1d2  
Pik3c2a  
Pik3c2b  
Pik3c3  
Pik3ca  
Pik3cb  
Pik3cd  
Pik3r1  
Pik3r2  
Pik3r3  
Pik3r4  
Pikfyve  
Pim1  
Pim2  
Pim3  
Pin1  
Pin4  
Pink1:PINK1  
Pinx1  
Pip4k2a  
Pip4k2b  
Pip4k2c  
Pip5k1a  
Pip5k1b  
Pip5k1c  
Pip5kl1  
Pisd  
Pisd-ps1  
Pisd-ps2:AK206103  
Pitpna  
Pitpnb  
Pitpnc1:M-rdgB beta  
Pitpnm1  
Pitpnm2:BC115953  
Pitpnm3  
Pitrm1  
Pja1

Pja2  
Pkd1l2  
Pkd2  
Pkdcc  
Pkhd1l1  
Pkia  
Pkib  
Pkig  
Pklr  
Pkm2  
Pkmyt1:Myt1  
Pkn1  
Pkn2  
Pknox1  
Pknox2  
Pkp2  
Pkp4  
Pla2g12a  
Pla2g15:Lpla2  
Pla2g4b  
Pla2g4e  
Pla2g7  
Plaa  
Plagl1:Zac1  
Plagl2  
Plat  
Plbd2  
Plcb1  
Plcb4  
Plcd1  
Plcd3  
Plcd4:Plcd  
Plcg1:AK169777  
Plch1  
Plch2  
Plcl1  
Plcl2  
Plcxd1  
Plcxd2  
Plcxd3

Pld2  
Pld3  
Pldn:pa  
Plec:Plec1  
Plek  
Plekha1  
Plekha3  
Plekha4  
Plekha5:mKIAA1686  
Plekha6:AK020645  
Plekha7  
Plekha8  
Plekhb1  
Plekhb2  
Plekhf2  
Plekhg1  
Plekhg5:mKIAA0720  
Plekhh2  
Plekhj1  
Plekhm1  
Plekhm2  
Plekhm3  
Plekho1  
Plin3:M6prbp1  
Plk1:Dctn5  
Plk1s1  
Plk2  
Plk3  
Plk4  
Plip  
Plod2  
Plod3  
Plp1  
Plp2  
Plrg1:PLRG1  
Pls3  
Plscr3  
Plscr4  
Plvap  
Plxna1

Plxna2  
Plxna3  
Plxna4  
Plxnb1  
Plxnb2  
Plxnc1  
Plxnd1  
Pm20d2  
Pmel  
Pmepa1  
Pmi:Mpi  
Pml  
Pmm1  
Pmm2  
Pmpca  
Pmpcb  
Pms2:BC083502  
Pmvk  
Pnck  
Pnkd  
Pnkp  
Pnma1  
Pnma2  
Pnma3  
Pnmal1  
Pnmal2  
Pnn  
Pno1  
Pnoc  
Pnpla2  
Pnpla3  
Pnpla6  
Pnpla8  
Pnpo  
Pnpt1:Old35  
Pnrc1  
Pnrc2  
Poc1a  
Poc1b:Wdr51b  
Poc5

Podn

Podxl

Podxl2:AK087743

Pofut1

Pofut2

Pog:Fancl

Pogk

Pogz

Pol

Pola1

Pola2

Polb

Pold1

Pold2

Pold3

Pold4

Poldip2

Poldip3

Pole2

Pole3

Pole4

Polg

Poli

Polk:Dinb1

Poll

Polm:Pol mu

Polq

Polr1a

Polr1b

Polr1c

Polr1d

Polr1e

Polr2b

Polr2c

Polr2d

Polr2e

Polr2f

Polr2g

Polr2h

Polr2i



Polr2j  
Polr2k  
Polr2l  
Polr3a  
Polr3b  
Polr3c  
Polr3d  
Polr3e  
Polr3f  
Polr3g  
Polr3gl  
Polr3h  
Polr3k  
Polrmt  
Pom121  
Pomc  
Pomgnt1  
Pomp  
Pomt1  
Pomt2  
Pon2  
Pop1  
Pop4  
Pop5  
Pop7  
Popdc3  
Por  
Porcn:Mporc-b  
Pot1a  
Pot1b  
Pou2f1:1-Oct  
Pou2f2  
Pou3f1  
Pou3f2  
Pou3f3  
Pou6f1  
Ppa1  
Ppa2  
Ppan:AK085695  
Ppap2a

Ppap2b  
Ppapdc1a  
Ppapdc1b  
Ppapdc2  
Ppapdc3  
Ppard  
Ppargc1a:PGC-1v  
Ppargc1b  
Ppat  
Ppcdc  
Ppcs  
Ppdpf  
Ppef1  
Ppfia1  
Ppfia2:mKIAA4112  
Ppfia3:mKIAA0654  
Ppfibp1  
Ppfibp2  
Pphln1  
Ppia  
Ppib  
Ppic  
Ppid  
Ppie  
Ppif  
Ppig  
Ppih  
Ppil1  
Ppil2  
Ppil3  
Ppil4  
Ppil6  
Ppip5k1:mKIAA0377  
Ppip5k2  
Ppm1a  
Ppm1b  
Ppm1d  
Ppm1e  
Ppm1f  
Ppm1g

Ppm1h  
Ppm1k  
Ppm1l:AK031097  
Ppm1m  
Ppme1  
Ppox  
Ppp1ca  
Ppp1cb:AK157914  
Ppp1cc  
Ppp1r10  
Ppp1r11  
Ppp1r12a  
Ppp1r12b  
Ppp1r12c  
Ppp1r13b  
Ppp1r13l  
Ppp1r14b  
Ppp1r14c  
Ppp1r14c  
Ppp1r15a  
Ppp1r15b  
Ppp1r16a  
Ppp1r16b  
Ppp1r1a  
Ppp1r1b  
Ppp1r2  
Ppp1r3c  
Ppp1r3d  
Ppp1r3e:AK131886  
Ppp1r3f  
Ppp1r7  
Ppp1r8  
Ppp1r9a:Neurabin  
Ppp1r9b  
Ppp2ca  
Ppp2cb  
Ppp2r1a  
Ppp2r1b  
Ppp2r2b  
Ppp2r2c

Ppp2r2d  
Ppp2r2d:Ppp2r2a  
    Ppp2r3a  
Ppp2r3c:G5pr  
    Ppp2r3d  
    Ppp2r4  
    Ppp2r5a  
    Ppp2r5b  
Ppp2r5c:mKIAA0044  
    Ppp2r5d  
Ppp2r5e:mKIAA4006  
    Ppp3ca  
    Ppp3cb  
    Ppp3cc  
    Ppp3r1  
    Ppp4c  
    Ppp4r1  
    Ppp4r2  
    Ppp4r4  
    Ppp5c  
    Ppp6c  
    Ppp6r1  
    Ppp6r2  
Ppp6r3:mKIAA1558  
    Pppde1  
    Pppde2  
Pprc1:mKIAA0595  
    Ppt1  
    Ppt2  
    Pptc7  
    Ppwd1  
    Pqbp1  
    Pqlc1  
    Pqlc2  
    Praf2  
Pramef8  
    Prc1  
    Prcc  
Prdm10  
Prdm11

Prdm15  
Prdm16:mel1  
Prdm2  
Prdm4  
Prdm5  
Prdm8  
Prdm9  
Prdx1  
Prdx2  
Prdx3  
Prdx4  
Prdx5  
Prdx6  
Preb  
Prelid1  
Prep  
Prepl  
Prex1  
Prex2  
Prg4  
Prickle1  
Prickle2  
Prickle3  
Prim1  
Prim2  
Prkaa1  
Prkaa2  
Prkab1  
Prkab2  
Prkaca  
Prkacb  
Prkag1  
Prkag2  
Prkar1a  
Prkar1b  
Prkar2a  
Prkar2b  
Prkca  
Prkcb  
Prkcc

Prkcd  
Prkcdbp  
Prkce  
Prkch  
Prkci  
Prkcq  
Prkcsh  
Prkcz  
Prkd1  
Prkd2  
Prkdc:DNA-PKcs(Prkds)  
Prkra  
Prkrip1  
Prkrir  
Prkx  
Prlr  
Prmt1:Mrmt1  
Prmt10  
Prmt2:Mir678  
Prmt3  
Prmt5:Jbp1  
Prmt6  
Prmt7:mKIAA1933  
Prmt8  
Prnp  
Proca1  
Procr  
Prokr2  
Prorsd1  
Prosapip1  
Prosc  
Prox1  
Proz  
Prpf18  
Prpf19  
Prpf3:AK084028  
Prpf31  
Prpf38a  
Prpf38b  
Prpf39

Prpf4  
Prpf40a:FBP11  
Prpf40b  
Prpf4b  
Prpf6  
Prpf8  
Prps1  
Prps2  
Prpsap1  
Prpsap2  
Prr12  
Prr14  
Prr15  
Prr24  
Prr3  
Prrc1  
Prrc2a  
Prrc2b  
Prrg2  
Prrg3  
Prrt2  
Prrt3  
Prrx1:AK038736  
Prss12  
Prss35  
Prss36  
Prss52  
Prune  
Prune2  
Psap  
Psat1  
Psd  
Psd2  
Psd3  
Psen1  
Psen2  
Psenen  
Psg16  
Psip1  
Pskh1

Psma1  
Psma2  
Psma3  
Psma4  
Psma5  
Psma6  
Psma7  
Psb1  
Psb10  
Psb2  
Psb3  
Psb4  
Psb5:Mir686  
Psb6  
Psb7  
Psc1  
Psc2  
Psc3  
Psc3ip  
Psc4  
Psc5  
Psc6  
Psd1  
Psd10  
Psd11  
Psd12  
Psd13  
Psd14  
Psd2  
Psd3  
Psd4  
Psd5  
Psd6  
Psd7:AK158379  
Psd8  
Psd9  
Pse1  
Pse2  
Pse3  
Pse4:AK163075



Psmf1  
Psmg1  
Psmg2  
Psmg3  
Psmg4  
Pspc1  
Psph  
Psrc1  
Pstk  
Ptbp1  
Ptbp2  
Ptcd1  
Ptcd2  
Ptcd3  
Ptch1  
Ptchd1  
Ptdss1  
Ptdss2  
Pten  
Pter  
Ptgds  
Ptger4  
Ptges2  
Ptges3  
Ptgis  
Ptgr2  
Pth1r  
Ptk2:FAK  
Ptk2b  
Ptma  
Ptms  
Ptn  
Ptn  
Ptov1  
Ptp4a1  
Ptp4a2  
Ptp4a3  
Ptpdc1  
Ptpla  
Ptplad1

Ptplb  
Ptpmt1  
Ptpn1  
Ptpn11  
Ptpn12  
Ptpn14  
Ptpn18  
Ptpn2  
Ptpn21  
Ptpn23  
Ptpn3  
Ptpn5  
Ptpn7  
Ptpn9  
Ptpra  
Ptprb  
Ptprd  
Ptpre  
Ptprf  
Ptprg  
PtpRJ  
Ptprk  
Ptpm:mKIAA4044  
Ptpn  
Ptpn2:mKIAA0387  
Ptprr  
Ptprs  
Ptprt  
Ptpru  
Ptpz1  
Ptrh2  
Pts  
Pttg1  
Pttg1ip  
Ptx3  
Puf60  
Pum1  
Pum2  
Pura  
Purb

Purg  
Pus1  
Pus10  
Pus3  
Pus7:mKIAA1897  
Pus7l  
Pusl1  
Pvr  
Pvrl1  
Pvrl2  
Pvrl3  
Pvt1  
Pwp1  
Pwp2:wdp103  
Pwwp2a  
Pwwp2b  
Pxdn  
Ppk  
Pxmp3  
Pxmp4  
Pxn  
Pycr2  
Pycr1:AK019237  
Pygb  
Pygo1  
Pygo2  
Pyroxd1  
Qars  
Qdpr  
Qk  
Qpct  
Qpctl  
Qrich1  
Qrsl1  
Qser1  
Qsox1  
Qsox2  
Qtrt1  
Qtrtd1  
R3hcc1

R3hdm1  
R3hdm2  
R74862  
Rab1  
Rab10  
Rab11a  
Rab11b  
Rab11fip2  
Rab11fip3  
Rab11fip5:Mir705  
Rab12  
Rab14  
Rab15  
Rab18  
Rab1b  
Rab21  
Rab22a:Rab22A  
Rab23  
Rab24  
Rab26  
Rab27a  
Rab27b  
Rab28  
Rab2a:Rab2A  
Rab2b:Rab2B  
Rab30  
Rab31:Rab22B  
Rab33a  
Rab33b  
Rab34  
Rab35  
Rab36  
Rab39b  
Rab3a  
Rab3b  
Rab3c  
Rab3d  
Rab3gap1  
Rab3gap2  
Rab3il1

Rab3ip  
Rab40b  
Rab40c:Rab40C  
Rab42-ps  
Rab43:Rab41  
Rab4a  
Rab4b:Rab4B:Mir3101  
Rab5a  
Rab5b  
Rab5c  
Rab6  
Rab6b  
Rab711  
Rab8a  
Rab8b:AK160964:Rab8B  
Rab9  
Rab9b  
Rabac1:Pra1  
Rabep1  
Rabep2  
Rabepk  
Rabgap1  
Rabgap1:mKIAA0471  
Rabgef1  
Rabggta  
Rabggtb:Snord45c  
Rabif  
Rab12:Rab12a  
Rab13  
Rab15  
Rac1  
Rac3  
Rad1  
Rad17  
Rad18:Rad18sc  
Rad21  
Rad23a  
Rad23b  
Rad50  
Rad51c

Rad51I3:TRAD/RAD51L3

Rad52

Rad54b

Rad54I:AK198271

Rad54I2

Rad9

Radil

Rae1

Raf1

Rage:Stk30:MOK

Rai1:mKIAA1820

Rai2

Rala

Ralb

Ralbp1

Ralgapa1

Ralgapa2:mKIAA1272

Ralgds:mKIAA1308

Ralgps1:mKIAA0351

Ralgps2

Raly

RalyI

Ramp1

Ramp2

Ramp3

Ran

Ranbp1

Ranbp10:mKIAA1464

Ranbp17

Ranbp2

Ranbp3

Ranbp6

Ranbp9

Rangap1:mKIAA1835

Rangrf

Rap1a

Rap1b

Rap1gap:mKIAA0474

Rap1gap2:mKIAA1039

Rap1gds1

Rap2a  
Rap2b  
Rap2c  
Rapgef1  
Rapgef2  
Rapgef5  
Rapgef6:mKIAA4052  
Rapgef1  
Raph1  
Rars  
Rars2  
Rasa1  
Rasa2  
Rasa3  
Rasal1  
Rasal2  
Rasd2  
Rasgef1a  
Rasgef1b  
Rasgef1c  
Rasgrf1  
Rasgrf2  
Rasgrp1:Rasgrp  
Rasgrp2  
Rasip1  
Rasl10a  
Rasl10b  
Rasl11b  
Rasl12  
Rassf1  
Rassf10  
Rassf2  
Rassf3  
Rassf5  
Raver2  
Rb1  
Rb1cc1:CC1  
Rbak  
Rbbp4  
Rbbp5

Rbbp6  
Rbbp7  
Rbbp9  
Rbck1  
Rbfa  
Rbfox1:Fox1  
Rbfox2:Rbm9  
Rbfox3  
Rbl2  
Rbm10  
Rbm11  
Rbm12  
Rbm12b  
Rbm15  
Rbm15b  
Rbm16:Scaf8  
Rbm17  
Rbm18  
Rbm19  
Rbm22  
Rbm24  
Rbm25  
Rbm26  
Rbm27  
Rbm28  
Rbm3  
Rbm33  
Rbm34  
Rbm39:Caper  
Rbm41  
Rbm42  
Rbm43  
Rbm45  
Rbm4b  
Rbm4b:Rbm4:Rbm14  
Rbm5  
Rbm6:AK078712  
Rbm7  
Rbm8a  
Rbms1



Rbms3  
Rbmx2  
Rbmxrt  
Rbp1  
Rbp4  
Rbpj:AK164362  
Rbx1  
Rc3h1  
Rc3h2  
Rcan1  
Rcan2  
Rcan3:Mir700  
Rcbtb1  
Rcbtb2  
Rcc1  
Rcc2  
Rccd1  
Rce1:Face-2  
Rchy1  
Rcl1  
Rcn1  
Rcn2  
Rcor1  
Rcor2  
Rcor3  
Rcsd1:AK020768  
Rdbp  
Rdh10  
Rdh11  
Rdh13  
Rdh14  
Rdx:BC147413  
Reck  
Recql  
Recql5:RecQ5  
Reep1  
Reep2  
Reep3  
Reep4  
Reep5

Reep6

Refbp2

Rela

Relb

Rel1

Reln

Rem2

Rep15

Repin1

Reps1

Reps2

Rer1

Rere

Rerg

Resp18

Ret

Retn

Rev1

Rev3l:Sez4

Rexo1

Rexo2

Rexo4

Rfc1

Rfc2

Rfc3

Rfc4

Rfc5

Rfesd

Rfk

Rfng:radical-fringe

Rft1

Rftn1

Rfwd2

Rfwd3

Rfx1

Rfx3

Rfx4

Rfx5

Rfx7

Rfxank

Rfxap  
Rg9mtd1  
Rg9mtd2  
Rg9mtd3  
Rgag4  
Rgl1  
Rgl2  
Rgma  
Rgmb  
Rgnef:mKIAA1998  
Rgp1  
Rgs10  
Rgs11  
Rgs12  
Rgs14  
Rgs16  
Rgs17  
Rgs19  
Rgs2  
Rgs20  
Rgs3  
Rgs4  
Rgs7:RGS7  
Rgs7bp  
Rgs8  
Rgs9  
Rhbdd2  
Rhbdd3  
Rhbd1  
Rhbd1  
Rhbd13:VRHO  
Rheb  
Rhoa  
Rhob  
Rhobtb1  
Rhobtb2:Dbc2  
Rhof  
Rhog  
Rhoq  
Rhot1:BC055823

Rhot2  
Rhou  
Rhov  
Rhox8  
Rhpn1  
Rhpn2  
Rian:AF357425  
Ric3  
Ric8  
Ric8b  
Rictor  
Rif1  
Riiad1  
Rilpl1  
Rilpl2  
Rimbp2  
Rimbp3  
Rimkla  
Rimklb  
Rims1:mKIAA0340  
Rims2:RIM2  
Rin1  
Ring1  
Rint1  
Riok1  
Riok2  
Riok3  
Ripk1  
Ripk2:Rip2  
Rit1  
Rit2  
Rlbp1  
Rlf  
Rlim  
Rltpr  
Rmi1  
Rmnd1  
Rmnd5a  
Rmnd5b  
Rnaseh1:Rnh1

Rnaseh2a  
Rnaseh2b  
Rnaseh2c  
Rnasek  
Rnase1  
Rnaset2a:Rnaset2b  
Rnaset2b:Rnaset2a  
Rnd1  
Rnd2  
Rnd3  
Rnf10:RIE2  
Rnf103  
Rnf11:AK139182  
Rnf112  
Rnf113a1  
Rnf113a2  
Rnf114  
Rnf115  
Rnf121  
Rnf122  
Rnf123:Kpc1  
Rnf126  
Rnf128  
Rnf13:Rzf  
Rnf130  
Rnf138:TRIF  
Rnf139  
Rnf14:Triad2  
Rnf144a  
Rnf145  
Rnf146  
Rnf149:AK040602  
Rnf150  
Rnf152  
Rnf157  
Rnf160:Ltn1  
Rnf165:Akd2  
Rnf166  
Rnf167  
Rnf168

Rnf169  
Rnf170  
Rnf180  
Rnf181  
Rnf182  
Rnf185  
Rnf187  
Rnf19a  
Rnf19b  
Rnf2  
Rnf20  
Rnf208  
Rnf214  
Rnf215  
Rnf216  
Rnf217  
Rnf219  
Rnf220  
Rnf24  
Rnf26  
Rnf31  
Rnf32:Lmbr2  
Rnf34  
Rnf38:AK172190  
Rnf4  
Rnf40  
Rnf41  
Rnf44  
Rnf5  
Rnf6  
Rnf7  
Rnf8  
Rnft2  
Rngtt  
Rnh1  
Rnmt  
Rnmtl1  
Rnpc3:mKIAA1839:Amy1  
Rnpep  
Rnpep1:AK138067

Rnps1  
Robld3  
Robo2:mKIAA1568:Robo1  
Robo2:Robo1  
Robo3  
Rock1  
Rock2:Rock1  
Rod1  
Rogdi  
Romo1  
Ropn1l  
Rorb  
Rp2h  
rp9  
Rpa1  
Rpa2  
Rpa3  
Rpain  
Rpap1:mKIAA1403  
Rpap2  
Rpap3  
Rpe  
Rpf2  
Rpgr1p1  
Rpgr1p1l  
Rph3a  
Rpia  
Rpl10  
Rpl10a  
Rpl11  
Rpl12  
Rpl13  
Rpl13a-ps1:Rpl13a:Snord34  
Rpl14  
Rpl15  
Rpl17  
Rpl18  
Rpl18a:Gm15427  
Rpl19  
Rpl21

Rpl22  
Rpl22i1  
Rpl23  
Rpl23a  
Rpl24  
Rpl26  
Rpl27  
Rpl27a  
Rpl28  
Rpl29  
Rpl3  
Rpl30  
Rpl32  
Rpl34:Rpl34-ps1  
Rpl35  
Rpl35a  
Rpl36  
Rpl36a  
Rpl36al  
Rpl37  
Rpl37a  
Rpl38  
Rpl39  
Rpl4  
Rpl41  
Rpl5  
Rpl6  
Rpl7  
Rpl7a  
Rpl7i1  
Rpl8  
Rpl9  
Rplp0  
Rplp1  
Rplp2  
Rpn1  
Rpn2  
Rpp14  
Rpp21:CAT60  
Rpp25



Rpp30

Rpp38

Rpp40

Rprd1a

Rprd1b

Rprd2

Rprm

Rprml

Rps10

Rps11

Rps12:Snord100:Snora33

Rps13

Rps14

Rps15

Rps15a

Rps16

Rps17

Rps18

Rps19

Rps19-ps3

Rps19bp1

Rps20

Rps21

Rps24

Rps25

Rps26

Rps27

Rps27a

Rps27l

Rps28

Rps29

Rps3:Snord15b

Rps3a

Rps4x

Rps4x

Rps5

Rps6

Rps6ka2:Rps6ka3:rsk3

Rps6ka4

Rps6ka5

Rps6ka6  
Rps6kb1  
Rps6kb2  
Rps6kc1  
Rps6kl1  
Rps7  
Rps8  
Rps9  
Rpsa  
Rptor:raptor  
Rpusd1  
Rpusd2  
Rpusd3  
Rpusd4  
Rqcd1  
Rraga  
Rragb  
Rragd:AK081204:Ragd  
Rragd:Rragc  
Rras  
Rras2  
Rrbp1  
Rrm1  
Rrm2  
Rrm2b  
Rrn3  
Rrp1  
Rrp12  
Rrp15  
Rrp1b  
Rrp36  
Rrp7a  
Rrp8  
Rrp9  
Rrs1  
Rsad1  
Rsb1  
Rsb1l  
Rsf1  
Rsl1d1

Rsl24d1  
Rsph3a  
Rsph3b:Rshl2a  
Rsph4a  
Rsph9  
Rspo2  
Rspo3  
Rspry1  
Rspry1  
Rsrc1  
Rsrc2  
Rsu1  
Rtcd1:BC051062  
Rtel1  
Rtf1:cbp82  
Rtkn  
Rtn1:Rtn-1A  
Rtn2  
Rtn3:AK043844  
Rtn4  
Rtn4r  
Rtn4r1  
Rttn  
Rufy1  
Rufy2  
Rufy3  
Rundc1  
Rundc3a  
Rundc3b  
Runx1t1  
Runx2:Runx3  
Rusc1  
Rusc2  
Ruvbl1  
Ruvbl2  
Rwdd1  
Rwdd2a  
Rwdd2b  
Rwdd3  
Rwdd4a

Rxfp2:Great

Rxfp3

Rxra

Rxrb

Rxrg

Rybp

Ryk

Ryr1

Ryr2:AK159010

Ryr3

S100a1

S100a10

S100a11

S100a13

S100a16

S100a4

S100a6

S100b

S100ppp

Saal1

Sac3d1

Sacm1l

Sae1

Safb

Safb2

Sall2

Sall3

Samd1

Samd10

Samd12

Samd14

Samd4

Samd4b

Samd5

Samd8

Samhd1

Samm50

Samsn1

Sap130

Sap30

Sap30bp  
Sap30l  
Sar1a  
Sar1b  
Sarm1  
Sarnp:1110005A23Rik  
Sars  
Sart1  
Sart3  
Sash1:SASH1  
Sass6  
Sat1  
Sat2  
Satb1  
Satb2  
Sav1  
Sbds  
Sbf1  
Sbf2  
Sbk1  
Sbno1  
Sbno2:Sno  
Sbsn  
Sc4mol  
Sc5d  
Scaf1  
Scaf11  
Scaf4:Srsf15  
Scai  
Scamp1  
Scamp2  
Scamp4  
Scamp5  
Scand1  
Scand3  
Scap  
Scaper  
Scarb1  
Scarb2  
Sccpdh

Scd1  
Scd2  
Scel  
Scfd1  
Scfd2  
Scg2  
Scg3  
Scg5  
Sclt1  
Scly  
Scmh1:scmh1  
Scml2  
Scml4  
Scn1b  
Scn2a1:Scn1a  
Scn2a1:Scn2a  
Scn2b  
Scn3a  
Scn3b  
Scn8a  
Scn9a  
Scnm1  
Sco1  
Scoc  
Scp2  
Scpep1  
Scrib  
Scrn1  
Scrn3  
Scrt1  
Scyl1  
Scyl3  
Sdad1  
Sdc2  
Sdc3  
Sdc4  
Sdcbp  
Sdccag1  
Sdccag3  
Sdccag8:Cccap

Sdf2  
Sdf2l1  
Sdf4  
Sdha  
Sdhaf1  
Sdhaf2:0610038F07Rik  
Sdhb  
Sdhc  
Sdhd  
Sdk1  
Sdpr  
Sec11a  
Sec11c  
Sec13  
Sec14l1  
Sec14l2  
Sec14l3  
Sec16a  
Sec20:Bnip1  
Sec22a  
Sec22b  
Sec22c  
Sec23a  
Sec23b  
Sec23ip  
Sec24a  
Sec24b  
Sec24c  
Sec24d  
Sec31a  
Sec61a1  
Sec61a2  
Sec61b  
Sec61g  
Sec62  
Sec63  
Secisbp2l  
Sef:ll17rd  
Seh1l  
Sel1l

Sel1l3:AK031770

Selk

Selm

Sema3c

Sema3e:AK031300

Sema4a

Sema4b:mKIAA1745

Sema4c:mKIAA1739

Sema4f

Sema4g

Sema5a

Sema6a

Sema6b

Sema6d

Sema7a

Senp2

Senp3

Senp5

Senp6

Senp7:mKIAA1707

Senp8

Sephs1

Sephs2

Sepn1

Sepp1

Sepw1

Sepx1

Serac1

Serbp1:AK158095

Serf1

Serf2

Sergef

Serinc1:AIGP-2

Serinc2

Serinc3

Serinc5

Serp1

Serp2

Serpina3n

Serpinb1a



Serpinb6a  
Serpinb9  
Serpinc1  
Serpine2  
Serpig1  
Serpinh1  
Serpini1  
SerRSmt:Sars2  
Sertad2  
Sertad3  
Sertad4  
Sesn1  
Sestd1  
Set  
Setbp1  
Setd1a  
Setd2  
Setd3  
Setd4  
Setd6  
Setd7  
Setd8  
Setdb1  
Setdb2:Gm6907  
Setx  
Sez6  
Sez6l  
Sez6l2  
Sf1:AK140725  
Sf3a1  
Sf3a3  
Sf3b1  
Sf3b2  
Sf3b3  
Sf3b4  
Sf3b5  
Sf4:Sugp1  
Sfi1:BC049259  
Sfmbt1  
Sfmbt2

Sfpq  
Sfrp1  
Sfrs16:Clasrp:ClaspL  
Sfrs18  
Sft2d1:Gm12166  
Sft2d3  
Sfxn1  
Sfxn2  
Sfxn3  
Sfxn4  
Sfxn5  
Sgcb  
Sgce  
sgigsf:Cadm1:ra175a  
Sgip1:SGIP1alpha  
Sgk1  
Sgms1  
Sgol2  
Sgpl1:mKIAA1252  
Sgpp1  
Sgsh  
Sgsm1  
Sgsm2:mKIAA0397  
Sgsm3:Cip85  
Sgta  
Sgtb  
Sh2b1:Psmbeta  
Sh2b2  
Sh2d3c  
Sh2d5  
Sh2d7  
Sh3bgr1  
Sh3bgr13  
Sh3bp2  
Sh3bp4  
Sh3bp5  
Sh3bp5l  
Sh3d19  
Sh3gl1  
Sh3gl2

Sh3gl3  
Sh3glb1:AK086477  
Sh3glb2  
Sh3kbp1  
Sh3pxd2a  
Sh3pxd2b  
Sh3rf1  
Sh3rf3  
Sh3yl1  
Shank1  
Shank2  
Shank3  
Sharpin  
Shc2  
Shd  
Shf  
Shfm1  
Shh  
Shisa4  
Shisa5  
Shisa6  
Shisa7  
Shisa9  
Shkbp1  
Shmt2  
Shoc2  
Shprh  
Shq1  
Shroom2  
Siae  
Siah1a  
Siah2  
Sidt1:AK047199  
Sidt2  
Sigmar1  
Sik1  
Sik3  
Sike1  
Sil1  
Sin3a

Sin3b  
Sip1  
Sipa1:mKIAA4074  
Sipa111  
Sipa112  
Sipa113:mKIAA0545  
Sirpa  
Sirt1  
Sirt2  
Sirt3  
Sirt4  
Sirt5  
Sirt6  
Sirt7  
Siva1  
Six5  
Skap1  
Skap2  
Ski  
Skil  
Skiv2l  
Skiv2l2  
Skp1a  
Skp2  
SKRP1:Dusp19  
Sla  
Sla2  
Slain1  
Slain2  
Slbp  
Slc10a7:P7  
Slc11a2:Nramp2:AK182549  
Slc12a2  
Slc12a4:Kcc1  
Slc12a5  
Slc12a6  
Slc12a9:Slc12a8  
Slc14a1  
Slc15a3  
Slc15a4

Slc16a1  
Slc16a11  
Slc16a13  
Slc16a14  
Slc16a2  
Slc16a4  
Slc16a6  
Slc16a7  
Slc17a5  
Slc17a6  
Slc17a7  
Slc17a8  
Slc18a2:slc18a2  
Slc19a1  
Slc1a1  
Slc1a2  
Slc1a3  
Slc1a4  
Slc1a6  
Slc20a1  
Slc20a2  
Slc22a15  
Slc22a17  
Slc22a21  
Slc22a23  
Slc22a3  
Slc22a4  
Slc22a5  
Slc23a3  
Slc24a2  
Slc24a3  
Slc24a4  
Slc25a1  
Slc25a11  
Slc25a12  
Slc25a14  
Slc25a15  
Slc25a16  
Slc25a17  
Slc25a18

Slc25a19

Slc25a20

Slc25a22

Slc25a23

Slc25a24

Slc25a25

Slc25a26

Slc25a27:UCP4:AK084741

Slc25a28

Slc25a29

Slc25a3

Slc25a32

Slc25a33

Slc25a35

Slc25a36:AK035037

Slc25a37

Slc25a38

Slc25a39

Slc25a4

Slc25a40

Slc25a42

Slc25a44

Slc25a46

Slc25a5

Slc26a1

Slc26a10

Slc26a11

Slc26a4

Slc26a6:slc26a6

Slc27a1

Slc27a2

Slc27a4

Slc29a1:Ent1

Slc29a2

Slc29a3:Ent3

Slc29a4

Slc2a1

Slc2a13

Slc2a3

Slc2a6

Slc2a8:GLUTX1

Slc30a1

Slc30a10

Slc30a3

Slc30a4

Slc30a5

Slc30a6

Slc30a7

Slc30a9

Slc31a1

Slc32a1

Slc33a1

Slc35a1

Slc35a2

Slc35a3

Slc35a4

Slc35a5

Slc35b1

Slc35b2

Slc35b3

Slc35b4

Slc35c1

Slc35c2

Slc35d1

Slc35e1

Slc35e2

Slc35e3

Slc35e4

Slc35f1

Slc35f3

Slc35f4

Slc35f5

Slc36a1

Slc37a3

Slc37a4

Slc38a1

Slc38a10

Slc38a2

Slc38a3

Slc38a4

Slc38a6

Slc38a7

Slc38a9:AK037026

Slc39a1

Slc39a10

Slc39a11

Slc39a12

Slc39a13

Slc39a14

Slc39a2

Slc39a3

Slc39a5

Slc39a6

Slc39a7

Slc39a9

Slc3a2

Slc41a1

Slc41a2

Slc41a3

Slc43a2:slc43a2

Slc44a1

Slc44a2

Slc44a5

Slc45a1

Slc45a4

Slc46a1

Slc48a1

Slc4a10

Slc4a1 ap

Slc4a3

Slc4a4

Slc4a7

Slc4a8

Slc50a1

Slc5a3

Slc5a5

Slc5a6

Slc6a1

Slc6a11

Slc6a15



Slc6a17  
Slc6a6  
Slc6a7  
Slc6a8:CRT  
Slc7a1  
Slc7a10  
Slc7a14  
Slc7a3  
Slc7a4  
Slc7a5:4F2 lc  
Slc7a6  
Slc7a6os  
Slc7a8  
Slc8a1:NCX1  
Slc8a2  
Slc8a3  
Slc9a1  
Slc9a3r1  
Slc9a3r2  
Slc9a4  
Slc9a5  
Slc9a6:mKIAA0267  
Slc9a7  
Slc9a9  
Slco1c1:Oatp2  
Slco3a1  
Slco5a1  
Slfn2  
Slfn5  
Slirp:1810035L17Rik  
Slit1  
Slit2  
Slit3  
Slitrk1  
Slitrk2  
Slitrk3  
Slitrk4  
Slitrk5  
Slk  
Slm1:Khdrbs2

SImap:mKIAA1601

Slmo1

Slmo2

Sltm:Met

Slu7

Smad1

Smad2

Smad4

Smad5

Smad7

Smad9

Smad1

Smad2

Smarca1:Snf2l

Smarca2

Smarca4

Smarca5

Smarcal1

Smarcb1

Smarcc1

Smarcc2

Smarcd1

Smarcd2

Smarcd3

Smarce1

Smc1a

Smc1b

Smc2

Smc3

Smc4:SMC4

Smc5

Smc6

Smcr7

Smcr7l

Smcr8

Smek1

Smek2

Smg1

Smg5

Smg6:mKIAA0732

Smg7  
Smg8:1200011M11Rik  
SMIF:Dcp1a  
Smn1:SMN  
Smndc1  
Smoc1  
smoc2:Smoc2  
Smox  
Smpd1  
Smpd2  
Smpd3  
Smpd4:mKIAA1418  
Smpdl3a  
Sms  
Smtnl2  
Smu1  
Smug1  
Smurf1  
Smurf2  
Smyd2  
Smyd3  
Smyd4  
Smyd5  
Snap23  
Snap25  
Snap29  
Snap47  
Snap91:mKIAA0656  
Snapc1  
Snapc3  
Snapc4  
Snapc5  
Snapin:Snapap  
Snca  
Sncaip  
Sncb  
Snd1  
Snf8  
Snhg10  
Snhg11

Snhg12:Snord99

Snhg3

Snhg6

Snhg7:Snora17

Snhg9

Snip1

Snn

Snora31

Snora65

Snord104

Snord12

Snord47

Snord7

Snord72

Snph

Snrk

Snrnp200

Snrnp25

Snrnp27

Snrnp35

Snrnp40

Snrnp48

Snrnp70

Snrpa

Snrpa1

Snrpb

Snrpb2

Snrpc

Snrpd1

Snrpd2

Snrpd3

Snrpe

Snrpf

Snrpg

Sntg1

Snupn

Snurf

Snw1

Snx1

Snx10

Snx11

Snx12

Snx13

Snx14

Snx15:AK045837

Snx16

Snx17

Snx18

Snx19

Snx2

Snx21

Snx22

Snx24

Snx25

Snx27

Snx3

Snx30

Snx32

Snx4

Snx5

Snx6

Snx7

Snx8

Sobp

Socs2

Socs5

Socs7

Sod1

Sod2

Solh

Son:mKIAA1019

Sorbs1:mKIAA1296

Sorbs2

Sorcs1

Sorcs2

Sorcs3

Sord

Sorl1

Sort1

Sos1

Sos2:AK138088

Sostdc1

Sox1

Sox11

Sox12

Sox13

Sox2

Sox2ot:Mir1897

Sox3

Sox4

Sox5:mSox5L

Sox8

Sox9

Sp1

Sp2

Sp3

Sp4

Sp9

Spag1

Spag6:BC061194

Spag7

Spag8

Sparc

Sparcl1

Spast

Spata1

Spata19

Spata2

Spata2L

Spata5

Spata6

Spata7

Spats2

Spats2l

Spc24

Spc25

Spcs1

Spcs2

Spcs3

Spf1

Speg  
Spem:MINT  
Spg11  
Spg20  
Spg21  
Spg7  
Sphk2  
Sphkap  
Spin1  
Spin2  
Spink10  
Spink8  
Spint2:Hai2  
Spire1:AK053505  
Spna2  
Spnb1  
Spnb2:AK137356  
Spnb3  
Spnb4  
Spns1  
Spns2  
Spock1  
Spock2  
Spock3  
Spon1  
Spop  
Spopl  
Sppl2b:3110056O03Rik  
Sppl3  
Spr  
Spred1  
Spred2  
Spred3:Spred-3  
Sprn  
Spry1  
Spry2  
Spry3  
Spry4  
Spryd3  
Spryd4

Sptlc1  
Sptlc2  
Spty2d1  
Sqle  
Sqstm1  
Sra1  
Srbd1  
Src  
Srcin1  
Srcrb4d  
Srd5a1  
Srd5a3  
Srebf1  
Srebf2  
Srek1ip1:Sfrs12ip1  
Srf  
Srgap1  
Srgap2  
Srgap3  
Sri  
Srl  
Srm  
Srp14  
Srp19  
Srp54b:Srp54a:Srp54c  
Srp68  
Srp72  
Srp9  
SRPK1:Srpk1  
Srpk2  
Srpr  
Srprb  
SrpX:Rpgr  
SrpX2  
Srr  
Srrd  
Srrm1  
Srrm2  
Srrm3:2900083I11Rik  
Srrm4:1500001A10Rik



Srrt  
Srsf1  
Srsf10:nssr 1  
Srsf11:Sfrs11  
Srsf12  
Srsf13b  
Srsf2  
Srsf3:Sfrs3  
Srsf5  
Srsf6  
Srsf7:Sfrs7  
Srsf8:Sfswap  
Srsf9  
Srxn1  
Ss18  
Ss18l1  
Ssb  
Ssbp1  
Ssbp2:AK039140  
Ssbp3  
Ssbp4  
Ssh2:mSSH-2L  
Ssh3  
Ssna1  
Ssr1  
Ssr2  
Ssr3  
Ssr4  
Ssrp1  
Sst  
Sstr1  
Sstr2  
Sstr3  
Ssu72  
Ssx2ip:mKIAA0923  
St13  
St18  
St3gal1:AK169958  
St3gal2  
St3gal3

St3gal4  
St3gal5  
St3gal6  
St5  
St6gal1  
St6galnac4  
St6galnac5  
St6galnac6:ST6GalNAc VI  
St7:Fam4a2:St7I  
St7I  
St8sia1  
St8sia2  
St8sia3  
St8sia4:ST8SiaIV  
St8sia5  
St8sia6  
Stac  
Stag1  
Stag2:SAP2  
Stag3  
Stam  
Stam2  
Stambp  
Stambp1  
Stap1  
Star  
Stard10  
Stard3  
Stard3nl  
Stard4  
Stard5  
Stard6  
Stard7  
Stard8:mKIAA0189  
Stat1  
Stat2  
Stat3  
Stat4  
Stat5b:AK088966  
Stau1:AK041781

Stau2  
Stbd1  
Stc1  
Steap2  
Stim1:AK191080  
Stim2  
Stip1  
Stk10  
Stk11:lkb1  
Stk11ip  
Stk16:edpk  
Stk19  
Stk24  
Stk25  
Stk3  
Stk32b  
Stk32c  
Stk33  
Stk35  
Stk38  
Stk38l  
Stk39  
Stk4  
Stk40  
Stmn1  
Stmn2  
Stmn3  
Stmn4  
Stoml1  
Stoml2  
Ston2  
Stox2  
Stra13  
Strada  
Strap  
Strbp  
Strn3  
Strn4  
Stt3a  
Stt3b

Stub1  
Stx12  
Stx16  
Stx17  
Stx18  
Stx1a  
Stx1b  
Stx2  
Stx3  
Stx4a  
Stx5a  
Stx6  
Stx7  
Stx8  
Stxbp1  
Stxbp2  
Stxbp3a  
Stxbp4  
Stxbp5  
Stxbp5l  
Stxbp6  
Styk1  
Styx  
Sub1  
Sucla2  
Suclg1  
Suds3  
Supg2:Sfrs14  
Sugt1  
Sulf2  
Sult2b1  
Sult4a1  
Sumf1  
Sumf2  
Sumo1  
Sumo2:Mir684-1  
Sumo3  
Sun1:Unc84a  
Sun2  
Suox

Supt3h

Supt4h1

Supt5h

Supt6h

Supt7l

Supv3l1

Surf1

Surf2

Surf4

Surf6:AK043984

Susd1:OTTMUSG00000007332

Susd4

Suv39h1

Suv39h2

Suv420h1

Suv420h2

Suz12

Sv2a

Sv2b

Sv2c

svct2:Slc23a2

Svip

Svop

Syap1

Sybu

Syce2

Sycp2

Sycp3

Syde2

Syf2

Syk:Sykb

Sympk

Syn1

Syn2

Syn3

Syncrip

Syne1

Syne1

Syne2:mKIAA1011

Syngr1

Syng3  
Synj1  
Synj2:mKIAA0348  
Synm  
Synpo  
Synpr  
Synrg  
Syp  
Sypl  
Sys1  
Syt1  
Syt11  
Syt12  
Syt13  
Syt16  
Syt17  
Syt3  
Syt4  
Syt5  
Syt7  
Syt9  
Syt12:slp2-a  
Syn1  
Szt2:BC059842  
Tab1  
Tab2  
Tab3  
Tac1:AK019709  
Tacc1  
Tacc2:mKIAA4180  
Tacc3  
Taco1  
Tacr3  
Tada1l:Tada1  
Tada2a  
Tada2b  
Tada3  
Taf1  
Taf10  
Taf11

Taf12  
Taf13  
Taf15  
Taf1a  
Taf1b  
Taf1c  
Taf1d  
Taf2  
Taf3  
Taf4a  
Taf4b  
Taf5  
Taf5l  
Taf6:AK047944  
Taf6l  
Taf7  
Taf7l  
Taf8  
Taf9  
Taf9  
Taf9b  
Tagap1  
Tagln  
Tagln3  
Tal1  
Taldo1  
Tanc2:mKIAA1148  
Tank  
Taok1  
Taok2  
Taok3  
Tappb  
Tapt1  
Tarbp2  
Tardbp  
Tars  
Tars2  
Tarsl2  
Tas1r1  
Tasp1

Tatdn1  
Tatdn2  
Tatdn3  
Tax1bp1  
Taz  
Tbata:Spatial  
Tbc1d1:mKIAA1108  
Tbc1d10a  
Tbc1d10b  
Tbc1d12  
Tbc1d13  
Tbc1d14:kiaa1322  
Tbc1d15:AK048828  
Tbc1d16  
Tbc1d17  
Tbc1d19  
Tbc1d22a  
Tbc1d22b  
Tbc1d23:AK028852  
Tbc1d24  
Tbc1d25  
Tbc1d2b:mKIAA1055  
Tbc1d30  
Tbc1d5:mKIAA0210  
Tbc1d7  
Tbc1d8  
Tbc1d9  
Tbc1d9b:mKIAA0676  
Tbca  
Tbcb  
Tbcc  
Tbccd1  
Tbcd  
Tbce  
Tbcel  
Tbck  
Tbk1  
Tbkbp1  
Tbl1x  
Tbl1xr1



Tbl2  
Tbl3  
Tbp  
Tbpl1  
Tbr1  
Tbrg1  
Tbrg3  
Tbrg4  
Tbx2  
Tcea1  
Tcea2  
Tceal1  
Tceal3  
Tceal5  
Tceal6  
Tceal7  
Tceal8  
Tceb1  
Tceb2  
Tceb3  
Tcerg1  
Tcerg1l  
Tcf12  
Tcf20  
Tcf25:mKIAA1049  
Tcf4  
Tcf9:AW146020  
Tcfap4  
Tcfcp2  
Tcf15  
Tchp  
Tcirg1  
Tcof1  
Tcp1:AK163149  
Tcp1111:BC057381  
Tcp1112  
Tcta  
Tctex-3:Phf1  
Tctex1d2  
Tctn2

Tctn3  
Tdg  
Tdo2  
Tdp1  
Tdrd1  
Tdrd3  
Tdrd7  
Tdrkh:AK018134  
Tead1  
Tec  
Tecpr1:mKIAA1358  
Tecr  
Tef  
Telo2  
Tenc1  
Tep1:AK087740  
Terf1  
Terf2:mTRF2  
Terf2ip  
Tesc  
Tesk1  
Tet1  
Tet2  
Tet3  
Tex10  
Tex15  
Tex2  
Tex261  
Tex264  
Tfam  
Tfb1m  
Tfb2m  
Tfe3:Tcfe3  
Tfg  
Tfip11  
Tfpi  
Tfpt  
Tfrc  
Tgds  
Tgfa

Tgfb1i1  
Tgfb2  
Tgfb3  
Tgfr1  
Tgfr2  
Tgfr3  
Tgfrap1  
Tgm3  
Tgoln2  
Tgs1  
Th1l

Thada:mKIAA1767

Thap1  
Thap11  
Thap2  
Thap3  
Thap7  
Thbd  
Thbs1  
Thbs3  
Them4  
Thnsl1  
Thoc1

Thoc2:BC005561

Thoc3  
Thoc4  
Thoc5  
Thoc6  
Thoc7  
Thop1  
Thpo  
Thra  
Thrap3  
Thrb  
Thrsp  
Thsd4  
Thsd7a  
Thsd7b  
Thtpa  
Thumpd1

Thumpd3  
Thy1  
Tia1  
Tia1  
Tial1  
Tiam1  
Tiam2  
Tigd2  
Tigd5  
Tigit  
Timm10  
Timm13  
Timm17a  
Timm17b  
Timm22  
Timm23  
Timm44  
Timm50:AK211593  
Timm8a1  
Timm8b:Ddp2  
Timm9  
Timm9:AK039495  
Timp2  
Timp3  
Timp4  
Tinf2  
TIP5:Baz2a  
Tiparp  
Tipin  
Tiprl  
Tjap1  
Tjp1  
Tjp2  
Tk2  
Tkt  
Tlcd1  
Tle1  
Tle2  
Tle3  
Tle4:Tle1

Tlk1:mKIAA0137

Tlk2

Tln1:mKIAA1027

Tln2

Tm2d1:Bbp

Tm2d2

Tm2d3

Tm6sf1

Tm6sf2

Tm7sf2

Tm7sf3

Tm9sf1

Tm9sf2

Tm9sf3

Tm9sf4

Tmbim4:AK162942

Tmbim6

Tmc3

Tmc7

Tmcc1

Tmcc2

Tmcc3

Tmco1

Tmco3

Tmco6

Tmco7

Tmed1

Tmed10

Tmed2

Tmed3

Tmed4

Tmed5

Tmed7

Tmed8

Tmed9

Tmeff1

Tmeff2:TMEFF2

Tmem100

Tmem101

Tmem103:2610002I17Rik

Tmem104  
Tmem106b  
Tmem106c:AK177749  
Tmem108  
Tmem109  
Tmem11  
Tmem110  
Tmem111:AK164779  
Tmem114  
Tmem115  
Tmem117  
Tmem120a  
Tmem120b  
Tmem121  
Tmem123  
Tmem126a  
Tmem127  
Tmem128  
Tmem129  
Tmem130  
Tmem131  
Tmem132a  
Tmem132b  
Tmem132e  
Tmem134  
Tmem135  
Tmem136  
Tmem138  
Tmem141  
Tmem143:AK161481  
Tmem145  
Tmem146  
Tmem147  
Tmem149  
Tmem14a  
Tmem14c  
Tmem150a  
Tmem150c:BC062109  
Tmem151a  
Tmem151b

Tmem158  
Tmem159  
Tmem160  
Tmem161a  
Tmem161b  
Tmem163  
Tmem164  
Tmem165  
Tmem167  
Tmem168  
Tmem169  
Tmem17  
Tmem170b  
Tmem175  
Tmem176b  
Tmem177  
Tmem178  
Tmem179  
Tmem179b  
Tmem18  
Tmem180  
Tmem181a  
Tmem181a  
Tmem181b:Tmem181a:547127  
Tmem183a  
Tmem184b  
Tmem184c  
Tmem185b  
Tmem186  
Tmem188  
Tmem189  
Tmem19  
Tmem191c  
Tmem192  
Tmem194:AK005897  
Tmem194b  
Tmem198  
Tmem199  
Tmem2  
Tmem20

Tmem200a

Tmem201

Tmem202

Tmem203

Tmem205

Tmem206

Tmem208

Tmem209

Tmem214

Tmem216

Tmem219

Tmem22

Tmem222

Tmem223

Tmem229a

Tmem229b

Tmem231:4932417116Rik

Tmem25

Tmem29

Tmem30a

Tmem33

Tmem35

Tmem38a

Tmem38b

Tmem39a

Tmem39b

Tmem41a

Tmem41b

Tmem42

Tmem43

Tmem44

Tmem47

Tmem49:Mir21

Tmem5

Tmem50a

Tmem50b

Tmem53

Tmem55a

Tmem56

Tmem57



Tmem59  
Tmem59l  
Tmem60  
Tmem62  
Tmem63b  
Tmem63c  
Tmem64  
Tmem65  
Tmem66  
Tmem67  
Tmem68  
Tmem69  
Tmem70  
Tmem8  
Tmem80  
Tmem85  
Tmem86a  
Tmem87a  
Tmem87b  
Tmem88  
Tmem88b  
Tmem8b  
Tmem9  
Tmem90a  
Tmem90b  
Tmem91  
Tmem93  
Tmem97  
Tmem9b  
Tmf1  
Tmlhe  
Tmod1  
Tmod2  
Tmod3  
Tmpo  
Tmppe  
Tmprss7  
Tmsb10  
Tmsb15b2:Tmsb15l:Tmsb15b1  
Tmsb4x

Tmtc1

Tmtc3

Tmtc4

Tmub1

Tmub2

Tmx1

Tmx2

Tmx3

Tmx4

Tnfaip1

Tnfaip3

Tnfaip8

Tnfaip8l1

Tnfrsf10b

Tnfrsf12a

Tnfrsf19

Tnfrsf1a

Tnfrsf21

Tnfrsf22

Tnfsf11

Tnfsf13:BC096441:Tnfsf12

Tnik

Tnip1

Tnip2

Tnk2

Tnks

Tnks1bp1:mKIAA1741

Tnks2

Tnnt1

Tnp01

Tnp02

Tnp03

Tnr

Tnrc18

Tnrc6a

Tnrc6b

Tnrc6c:AK157659

Tob1

Tob2:AK044623

Toe1

Tollip  
Tom111  
Tom112  
Tomm20  
Tomm22  
Tomm34  
Tomm40:Tom40  
Tomm40l  
Tomm5  
Tomm6  
Tomm7  
Tomm70a  
Top1  
Top1mt  
Top2b  
Top3b:mTOP3beta  
Topbp1:mKIAA0259  
Topors  
Tor1a  
Tor1aip1:Lap1B  
Tor1aip2  
Tor1b  
Tor2a  
Tox  
Tox3  
Tox4:mKIAA0737  
Tpbg  
Tpcn1:calcium channel  
Tpd52  
Tpd52l1:mD53  
Tpd52l2  
Tpi1  
Tpm1  
Tpm3  
Tpm4  
Tpmt  
Tpp1  
Tpp2  
Tppp  
Tppp3

Tpr  
Tpra1  
Tprgl  
Tprkb  
Tprn  
Tpst1  
Tpst2  
Tpt1

Tra2a:AK076606:mAWMS1

Tra2b  
Trabd  
Tradd  
Traf3  
Traf3ip1  
Traf3ip2  
Traf4  
Traf6  
Traf7  
Trafd1  
Traip  
Trak1  
Trak2  
Tram1  
Tram1l1  
Trank1  
Trap1  
Trappc1  
Trappc10  
Trappc2  
Trappc2l  
Trappc3  
Trappc4  
Trappc5  
Trappc6a  
Trappc6b

Trappc8:AK079994

Trappc9  
Trerf1  
Trf  
Trfr2

Trhde  
Trhr  
Triap1  
Trib1  
Trib2  
Tril  
Trim11  
Trim13  
Trim2  
Trim23  
Trim24  
Trim27  
Trim28  
Trim3:hac1  
Trim32  
Trim33  
Trim35  
Trim36  
Trim37  
Trim39  
Trim41  
Trim44  
Trim45  
Trim46  
Trim5:Trim12a:Trim12  
Trim59  
Trim62  
Trim66  
Trim67  
Trim68  
Trim7:AK029860  
Trim8  
Trim9  
Trio  
Triobp  
Trip12:AK032919  
Trip13  
Trip4  
Trip6  
Trit1

Trm11:1190005F20Rik

Trmt1

Trmt11

Trmt112

Trmt12

Trmt2a

Trmt5

Trmt6

Trmt61a

Trmt61b

Trmu

Trnau1ap

Trnp1

Trnt1

Tro

Trove2

Trp53:p53

Trp53bp1:53BP1

Trp53bp2

Trp53i11

Trp53i13

Trp53inp2

Trpc1

Trpc2

Trpc3:trp3

Trpc4

Trpc4ap:mFLJ00177

Trpc5

Trpc7:Trp7

Trpm2

Trpm4

Trpm7:AK164850:ChaK

Trps1:Mir1907

Trpt1

Trpv2:GRC

Trrap

Trub1

Trub2

Tsc1

Tsc2:AK182281

Tsc22d2  
Tsc22d3:Tilz3b  
Tsc22d4  
Tsen15  
Tsen2  
Tsen34  
Tsen54  
Tsfm  
Tsg101  
Tsga10  
Tsga14  
Tshb  
Tshz1  
Tshz2  
Tshz3  
Tsku  
Tsn  
Tsnax  
Tsnaxip1  
Tspan12  
Tspan13  
Tspan14  
Tspan17  
Tspan18  
Tspan2  
Tspan3:tspar-3  
Tspan31  
Tspan33  
Tspan4  
Tspan5  
Tspan6  
Tspan7  
Tspan9  
Tspo  
Tspyl1  
Tspyl2  
Tspyl3  
Tspyl4  
Tspyl5  
Tsr1:mKIAA1401

Tsr2  
Tssc1  
Tssc4  
Tst  
Tsta3  
Tsx  
Ttbk1  
Ttbk2  
Ttc1  
Ttc13  
Ttc14  
Ttc15  
Ttc17:AK136355  
Ttc19  
Ttc21b:mKIAA1992  
Ttc23  
Ttc26  
Ttc27  
Ttc28  
Ttc3  
Ttc30a1  
Ttc30b  
Ttc33  
Ttc34  
Ttc35  
Ttc37  
Ttc38  
Ttc39b  
Ttc39c  
Ttc4  
Ttc5  
Ttc7  
Ttc7b  
Ttc8  
Ttc9  
Ttc9b  
Ttc9c  
Ttf1  
Tti1  
Ttl



Ttll1  
Ttll11:DQ699740  
Ttll12  
Ttll5:mKIAA0998  
Ttll7  
Ttpal  
TTRAP:Tdp2:AK140178  
Ttyh1  
Ttyh2  
Ttyh3  
Tuba1a  
Tuba1b  
Tuba1c  
Tuba4a  
Tubb2a  
Tubb2a-ps2  
Tubb2b  
Tubb2c  
Tubb3  
Tubb4  
Tubb5  
Tubd1  
Tube1  
tubg1:Tubg1:Tubg2  
Tubgcp2  
Tubgcp3:mKIAA0357  
Tubgcp4  
Tubgcp5  
Tufm  
Tug1  
Tulp3  
Tulp4  
Tulp4:AK161948:AK163710  
Tusc1  
Tusc2  
Tusc3  
Tut1  
Twf1  
Twf2  
Twistnb

Twsg1  
Txlna  
Txlng  
Txn1  
Txn2  
Txndc11  
Txndc12  
Txndc15  
Txndc16  
Txndc17  
Txndc5  
Txndc9  
Txnip  
Txnl1  
Txnl4a  
Txnl4b  
Txnrd1  
Txnrd2:TXNRD2  
Txnrd3  
Tyk2  
Tymp  
Tyms  
Tyro3  
Tyrobp  
Tysnd1  
Tyw1  
Tyw3  
U2af1  
U2af2  
U80893  
Uap1  
Uap1l1  
Uba1  
Uba2  
Uba3  
Uba5  
Uba52  
Uba6:AK017645  
Ubac2  
Ubadc1:Ubac1

Ubap1  
Ubap2  
Ubap21:lig-2a  
Ubash3b  
Ubb  
Ubb  
Ubc:Uba52:Ubb:AK183279  
Ube2a  
Ube2b  
Ube2cbp  
Ube2d1  
Ube2d2  
Ube2d3:Ube2d2b  
Ube2e1  
Ube2e2  
Ube2e3  
Ube2f  
Ube2g1  
Ube2g2  
Ube2h:Gm2058  
Ube2i  
Ube2j1  
Ube2j2:AK160359  
Ube2k  
Ube2l3  
Ube2l6  
Ube2m  
Ube2n:Ubc13  
Ube2o  
Ube2q1  
Ube2q2  
Ube2q11  
Ube2r2  
Ube2s  
Ube2v1  
Ube2v2  
Ube2w  
Ube2z  
Ube3a  
Ube3b

Ube4a  
Ube4b:Ufd2  
Ubfd1  
Ubiad1  
Ubl3  
Ubl4  
Ubl5  
Ublcp1  
Ubn1  
Ubn2:mKIAA2030  
Ubp1  
Ubqln1  
Ubqln2  
Ubqln4:ubin  
Ubr1  
Ubr2  
Ubr3  
Ubr4  
Ubr7  
Ubsd1  
Ubsd2  
Ubtf  
Ubxn2a  
Ubxn2b  
Ubxn4  
Ubxn7  
Ubxn8  
Uchl1  
Uchl3  
Uchl4  
Uchl5  
Uck1  
Uck2  
Uckl1  
Uevld  
Ufc1  
Ufd1l  
Uf11:1810074P20Rik  
Ufm1  
Ufsp1

Ufsp2  
Ugcg  
Ugcgl1:Uggt1  
Ugcgl2:Uggt2  
Ugdh  
Ugp2  
Uhrf1bp1  
Uhrf2:NIRF  
Uimc1  
Ulk1  
Ulk2  
Ulk3  
Ulk4  
Umps  
Unc119  
Unc119b  
Unc13a:AK141620  
Unc13b  
Unc13c  
Unc13d:mFLJ00067  
Unc45a  
Unc50  
Unc5a  
Unc5b  
Unc5c  
Unc5d  
Unc79  
Unc80  
Unk  
Unkl  
Upf1  
Upf2  
Upf3a  
Upf3b  
Upk1b  
Upp2  
Uqcc  
Uqcr10  
Uqcr11:Uqcr  
Uqcrb

Uqcrc1  
Uqcrc2  
Uqcrfs1  
Uqcrh  
Uqcrq  
Urb1  
Urgcp  
Urm1  
Urod  
Uros  
Use1  
Usf2  
Usmg5  
Uso1  
Usp1  
Usp10  
Usp11  
Usp12  
Usp13  
Usp14  
Usp15  
Usp16  
Usp19:mKIAA0891  
Usp2  
Usp20:Vdu2  
Usp21:Usp16  
Usp22  
Usp24  
Usp25:AK030906  
Usp27x  
Usp28  
Usp29  
Usp3:BC053974  
Usp30  
Usp31  
Usp32  
Usp34:mKIAA0570  
Usp35  
Usp36  
Usp37

Usp38

Usp39

Usp40

Usp42

Usp43

Usp45

Usp46

Usp47

Usp48

Usp5

Usp52:Pan2

Usp54

Usp6nl

Usp8:mUBPY

Usp9x

Usp11

Ust

Utp111

Utp14a

Utp15

Utp18

Utp20

Utp23

Utp3

Utp6

Utrn

Uty

Uvrag

Uxt

Vac14

Vamp1:AK080173

Vamp2

Vamp3

Vamp4

Vamp7

Vangl2

Vapa

Vapb

Vars

Vars2

Vash1  
Vash2  
Vasn  
Vasp  
Vat1  
Vat1l  
Vav3  
Vbp1  
Vcam1  
Vcl  
Vcp  
Vcpip1:AK031819  
Vdac1  
Vdac2  
Vdac3  
Vdu1:Usp33  
Vegfa  
Vegfb  
Vezf1  
Vezt  
Vgf  
Vgl4:AK078466  
Vhl  
Vim  
Vipar  
Vipr2  
Vkorc1  
Vkorc1l1  
Vldlr  
Vlgr1:Gpr98:Mass1  
Vma21  
Vmn1r90  
Vopp1  
Vprbp  
Vps11  
Vps13a:CHAC  
Vps13b:mKIAA0532  
Vps13c  
Vps13d:mKIAA0453  
Vps16:mVps16



Vps18  
Vps24  
Vps25  
Vps26a  
Vps26b  
Vps28  
Vps29  
Vps33a  
Vps33b  
Vps35  
Vps36  
Vps37a  
Vps37b  
Vps37c  
Vps37d  
Vps39  
Vps41  
Vps45  
Vps4a  
Vps4b  
Vps52  
Vps53  
Vps54  
Vps72  
Vrk1  
Vrk3  
Vsig2  
Vsn1  
Vstm2a  
Vstm2b  
Vstm2l  
Vta1  
Vti1a  
Vti1b  
Vwa1  
Vwa3a  
Vwa5b2  
Vwc2  
Vwc2l  
Wac

Wapal  
Wars  
Wasf1  
Wasf3  
Wasl  
Wbp1  
Wbp11  
Wbp2  
Wbp4  
Wbp5  
Wbp7:MI12  
Wbscr16  
Wbscr17  
Wbscr22  
Wbscr27  
Wdfy1  
Wdfy3  
Wdr1  
Wdr11  
Wdr12  
Wdr13  
Wdr17  
Wdr18  
Wdr19  
Wdr20a  
Wdr24  
Wdr25  
Wdr26  
Wdr3  
Wdr31  
Wdr33  
Wdr34  
Wdr35  
Wdr36  
Wdr37  
Wdr4:wdr4  
Wdr41  
Wdr43:mKIAA0007  
Wdr44  
Wdr45

Wdr45l

Wdr46

Wdr47

Wdr48

Wdr5

Wdr53

Wdr54

Wdr55

Wdr59

Wdr6

Wdr60

Wdr61

Wdr66

Wdr67

Wdr7

Wdr70:Gm1943

Wdr73

Wdr74

Wdr75

Wdr76

Wdr77

Wdr78

Wdr8:DD57

Wdr81

Wdr82

Wdr83

Wdr85

Wdr89

Wdr90

Wdr91

Wdr92

Wdr95:4930434E21Rik

Wdsub1

Wdte1

Wee1

Wfs1

Whamm:mKIAA1971

Whrn:mKIAA1526

Whsc1:mKIAA1090

Whsc111

Whsc2  
Wipf2  
Wipf3  
Wipi1  
Wipi2  
Wiz:wiz  
Wls  
Wnk1  
Wnk2  
Wnt2  
Wnt4  
Wnt5a  
Wnt7a  
Wnt7b  
Wrap53  
Wrb  
Wrnip1:WHIP  
Wsb1  
Wsb2  
Wscd1  
Wscd2  
Wtap  
Wtip  
Wwc1  
Wwc2:BC040690  
Wwox  
Wwp1  
Wwp2  
Wwtr1  
X95399  
X99384  
Xab2  
Xbp1  
Xiap  
Xk  
Xkr4:mKIAA1889  
Xkr6  
Xlr3b  
Xlr4b  
Xpa

Xpc  
Xpnpep1  
Xpnpep3  
Xpo1  
Xpo4:mKIAA1721  
Xpo6:mKIAA0370  
Xpo7  
Xpot  
Xpr1  
Xrcc1  
Xrcc2  
Xrcc3  
Xrcc4  
Xrcc5  
Xrcc6  
Xrcc6bp1  
Xrn1  
Xrn2  
Xylt1  
Xylt2  
Yaf2:YAF2  
Yap1  
Yars  
Yars2  
Ybey  
Ybx1  
Ydjc  
Yeats2  
Yeats4  
Yes1  
Yif1a  
Yif1b  
Yipf1  
Yipf2  
Yipf3  
Yipf4  
Yipf5  
Yipf6  
Yjefn3  
Ykt6

Ylpm1:zap

Yme111

Yod1

Ypel1

Ypel2

Ypel3

Ypel5

Yrdc

Ythdc1

Ythdc2

Ythdf1

Ythdf2

Ythdf3

Ywhab

Ywhae

Ywhag:14-3-3 gamma

Ywhah

Ywhaq

Ywhaz

Yy1

Zbed3

Zbed4

Zbed6

Zbtb1

Zbtb11

Zbtb16

Zbtb17

Zbtb2

Zbtb20:AK038731

Zbtb22

Zbtb24:Bif1

Zbtb25

Zbtb33

Zbtb34

Zbtb38

Zbtb4

Zbtb40

Zbtb41

Zbtb43

Zbtb45

Zbtb46

Zbtb48

Zbtb5

Zbtb6

Zbtb7a

Zbtb8a

Zbtb8b

Zbtb8os

Zbtb9

Zc3h10

Zc3h11a

Zc3h12c

Zc3h13

Zc3h14

Zc3h15

Zc3h18

Zc3h3:KIAA0150

Zc3h4

Zc3h6

Zc3h7a

Zc3h7b

Zc3h8

Zc3hav1l

Zc3hc1

Zc4h2

Zcchc10

Zcchc11:mKIAA0191

Zcchc12

Zcchc14

Zcchc16

Zcchc17

Zcchc18

Zcchc2

Zcchc3

Zcchc4

Zcchc6

Zcchc7

Zcchc8

Zcchc9

Zcrb1:MADP-1

Zcwpw1  
Zdbf2  
Zdhhc12  
Zdhhc13  
Zdhhc14  
Zdhhc15  
Zdhhc16  
Zdhhc18  
Zdhhc2  
Zdhhc20  
Zdhhc21:Gramp3  
Zdhhc23  
Zdhhc24  
Zdhhc4:AK181896  
Zdhhc5  
Zdhhc6  
Zdhhc7  
Zdhhc8  
Zdhhc9  
Zeb1  
Zeb2:mKIAA0569  
Zer1  
Zfand1  
Zfand2a  
Zfand2b  
Zfand3  
Zfand5  
Zfand6:Awp1  
Zfat  
Zfc3h1  
Zfhx2  
Zfhx4  
Zfml  
Zfp101  
Zfp105  
Zfp106  
Zfp108:Zfp93  
Zfp110  
Zfp119b  
Zfp12



Zfp120:Mzf31

Zfp13

Zfp142

Zfp143

Zfp148

Zfp157

Zfp160

Zfp161

Zfp169

Zfp174

Zfp180

Zfp182:AK043973

Zfp184

Zfp187

Zfp189

Zfp191:AK088914

Zfp192

Zfp2

Zfp207

Zfp212

Zfp213

Zfp235

Zfp236

Zfp238:rp58

Zfp239

Zfp248

Zfp251:AK018584

Zfp259

Zfp26:mKIAA4196

Zfp260

Zfp263

Zfp266

Zfp27

Zfp273

Zfp275

Zfp276:Znf276

Zfp277

Zfp28

Zfp280b

Zfp280c:mKIAA1584

Zfp280d:Znf280d:Suhw4

Zfp281

Zfp282

Zfp286

Zfp287:AK046006

Zfp292

Zfp295:AK170928

Zfp3

Zfp316:Emzf1

Zfp317

Zfp318

Zfp319

Zfp322a

Zfp324

Zfp329

Zfp330

Zfp334

Zfp335

Zfp341

Zfp346

Zfp35

Zfp353

Zfp354a

Zfp354c

Zfp358

Zfp362

Zfp365

Zfp367

Zfp3611

Zfp37

Zfp382

Zfp384

Zfp385a

Zfp385b

Zfp386:mKIAA4205

Zfp39

Zfp397

Zfp398

Zfp40

Zfp407

Zfp408

Zfp41

Zfp410:Apa1

Zfp414

Zfp420

Zfp422

Zfp423

Zfp426

Zfp428

Zfp442

Zfp444

Zfp445

Zfp446

Zfp449

Zfp454

Zfp458

Zfp46

Zfp462

Zfp467

Zfp472

Zfp488

Zfp507:Znf507

Zfp51

Zfp511

Zfp512:mKIAA1805

Zfp513:AK185715

Zfp518a:mKIAA0335

Zfp518b

Zfp52

Zfp523

Zfp524

Zfp532:mKIAA1629

Zfp536:mKIAA0390

Zfp553

Zfp558

Zfp560

Zfp563

Zfp566

Zfp575

Zfp579

Zfp58

Zfp580

Zfp583

Zfp592

Zfp593:Znf593

Zfp597

Zfp598

Zfp605

Zfp606

Zfp607

Zfp608:mKIAA1281:Znf608:AK155149

Zfp609

Zfp61

Zfp612

Zfp619

Zfp62

Zfp622

Zfp628

Zfp637

Zfp639

Zfp64

Zfp641

Zfp644

Zfp647

Zfp651

Zfp653

Zfp654

Zfp655:mKIAA4222

Zfp658

Zfp664

Zfp667

Zfp668

Zfp672

Zfp68

Zfp687:mKIAA1441

Zfp688

Zfp689

Zfp691

Zfp692-ps:Zfp692

Zfp697

Zfp697  
Zfp7  
Zfp703  
Zfp704  
Zfp706  
Zfp707  
Zfp708  
Zfp71-rs1  
Zfp710  
Zfp711  
Zfp712  
Zfp715  
Zfp719  
Zfp72  
Zfp738  
Zfp74  
Zfp740  
Zfp746  
Zfp748  
Zfp758  
Zfp760  
Zfp763  
Zfp768  
Zfp770  
Zfp771  
Zfp772  
Zfp775  
Zfp777  
Zfp780b  
Zfp780b:Zfp60  
Zfp783:mKIAA4190  
Zfp784  
Zfp786  
Zfp788  
Zfp790  
Zfp799  
Zfp800  
Zfp804a  
Zfp808  
Zfp809

Zfp810

Zfp811

Zfp82

Zfp821

Zfp825

Zfp827

Zfp828

Zfp830

Zfp839

Zfp84

Zfp846

Zfp865:6430526N21Rik

Zfp866:Zfp963

Zfp867

Zfp868

Zfp87

Zfp870

Zfp871

Zfp874:Zfp874a

Zfp879

Zfp9

Zfp90

Zfp91

Zfp92

Zfp930

Zfp932

Zfp933

Zfp935:Es113

Zfp937

Zfp94

Zfp941

Zfp942

Zfp943

Zfp944

Zfp945

Zfp946

Zfp947

Zfp948

Zfp949

Zfp951

Zfp954  
Zfp955a:Zfp422-rs1  
Zfp955b  
Zfp958  
Zfp959  
Zfp1  
Zfpm1  
Zfpm2  
Zfr  
Zfr2  
Zfx  
Zfyve1  
Zfyve16  
Zfyve19  
Zfyve20  
Zfyve21  
Zfyve26  
Zfyve27  
Zfyve28  
Zfyve9  
Zhx1  
Zhx2  
Zik1  
Zim1  
Zkscan1  
Zkscan14  
Zkscan3  
Zkscan5  
Zkscan6  
Zmat1:AK038525  
Zmat2  
Zmat3  
Zmat4  
Zmat5  
Zmiz1  
Zmiz2  
Zmpste24  
Zmym1  
Zmym2  
Zmym3

Zmym4  
Zmym5  
Zmym6  
Zmynd11:AK215297  
Zmynd17  
Zmynd19  
Zmynd8:mKIAA1125  
Znf326:Zfp326  
Znf451:Zfp451  
Znf496:Zkscan17  
Znf512b  
Znf551:Zfp551  
Znfx1  
Znhit1  
Znhit2-ps  
Znhit3  
Znhit6  
Znrd1  
Znrf1  
Znrf2  
Znrf3  
Zranb1:sr528  
Zranb2  
Zranb3  
Zrsr1  
Zrsr2  
Zscan12  
Zscan18  
Zscan21  
Zscan29  
Zswim1  
Zswim3  
Zswim4  
Zswim5  
Zswim6  
Zswim7  
Zufsp  
Zw10:MmZW10  
Zwilch  
Zwint



Zxda

Zxdb

Zxdc

Zyg11b

Zyx

Zzef1

Zzz3













IK018014

























































































































































































































































































































































































































1gb7:Pcdhga11:Pcdhgb8:Pcdhga12:Pcdhgc3:Pcdhgc4:Pcdhgc5:mKIAA0327
