# Supplementary material
Source: PubMed Central journal article supplement (PMC3964595)
Supplement: NIHMS549896-supplement-3.pdf [file NIHMS549896-supplement-3.pdf]

| Tissue single cells, bimodal genes |               | Culture single cells, bimodal genes                                                                  |             |               |                                                                                                         |
|------------------------------------|---------------|------------------------------------------------------------------------------------------------------|-------------|---------------|---------------------------------------------------------------------------------------------------------|
| UCSC IDS                           | GENE SYMBOL   | GENE NAME                                                                                            | UCSC IDS    | GENE SYMBOL   | GENE NAME                                                                                               |
| uc008j9r.1                         | 961001J09Rik  | RIKEN cDNA 0610031J08 gene                                                                           | uc008j9f.1  | Utsn          | urate 6- <i>hydroxylo-</i> hydrolase                                                                    |
| uc007wrm.1                         | 1110038F14Rik | RIKEN cDNA 1110038F14 gene                                                                           | uc012daf.1  | 6330407AC3Rik | RIKEN cDNA 6330407AC3 gene                                                                              |
| uc009nre.1                         | 1190005I06Rik | RIKEN cDNA 1190005I06 gene                                                                           | uc008hes.1  | 8430431K14Rik | RIKEN cDNA 8430431K14 gene                                                                              |
| uc009ipn.1                         | 1700028J07Rik | RIKEN cDNA 1700028J07 gene                                                                           | uc007ivs.1  | AK038627      |                                                                                                         |
| uc008mex.2                         | 1810024B03Rik | RIKEN cDNA 1810024B03 gene                                                                           | uc007tho.1  | AK049691      |                                                                                                         |
| uc007mu.2                          | 1810043H04Rik | RIKEN cDNA 1810043H04 gene                                                                           | uc007waz.1  | AK036274      |                                                                                                         |
| uc007tgs.1                         | 2210408E17Rik | RIKEN cDNA 2210408E17 gene                                                                           | uc008hw.1   | IB30134H01Rik | RIKEN cDNA IB30134H01 gene                                                                              |
| uc009ipg.1                         | 2310017I17Rik | RIKEN cDNA 2310017I17 gene                                                                           | uc007qz.2   | Bh11a1        | butyrophilin, subfamily 1, member A1                                                                    |
| uc007ned.1                         | 2410018L13Rik | RIKEN cDNA 2410018L13 gene                                                                           | uc008qf.2   | Cla3a         | chloride channel calcium activated 3                                                                    |
| uc008wdb.2                         | 2610002J02Rik | RIKEN cDNA 2610002J02 gene                                                                           | uc012gk1.1  | Clect18a      | C-type lectin calcium family 18, member A                                                               |
| uc009pai.2                         | 2610203C20Rik | RIKEN cDNA 2610203C20 gene                                                                           | uc009gdp.1  | Cox7a1        | cytochrome c oxidase subunit VIIa 1                                                                     |
| uc0077au.2                         | 2700349C3Rik  | RIKEN cDNA 2700349C3 gene                                                                            | uc008bpy.2  | Fam198b       | family with sequence similarity 198, member B                                                           |
| uc008cm.1                          | 3110044N11Rik | RIKEN cDNA 3110044N11 gene                                                                           | uc008lcc.1  | Gpr115        | G protein-coupled receptor 115                                                                          |
| uc008hqc.1                         | 4430402I18Rik | RIKEN cDNA 4430402I18 gene                                                                           | uc007zef.1  | Gpr156        | G protein-coupled receptor 156                                                                          |
| uc007zcp.1                         | 4930453N24Rik | RIKEN cDNA 4930453N24 gene                                                                           | uc009iul.1  | Gpr64         | G protein-coupled receptor 64                                                                           |
| uc009uan.2                         | 5530001H04Rik | RIKEN cDNA 5530001H04 gene                                                                           | uc007jzz.2  | Gag2          | germ cell-specific gene 2                                                                               |
| uc009by.2                          | 5730577G3Rik  | RIKEN cDNA 5730577G3 gene                                                                            | uc011wyt.1  | Il1r2         | interleukin 1 receptor, type II                                                                         |
| uc009m.2                           | 6720451G15Rik | RIKEN cDNA 6720451G15 gene                                                                           | uc008ily.1  | Impa2         | inositol (myo)-1- $\alpha$ -D-mannophosphate 2                                                          |
| uc009imv.1                         | 8030407P20Rik | RIKEN cDNA 8030407P20 gene                                                                           | uc008qpn.2  | Nmi           | N-myc (and STAT) interactor                                                                             |
| uc012ffq.1                         | 9130221H12Rik | RIKEN cDNA 9130221H12 gene                                                                           | uc009psf.2  | Nrg4          | neuregulin 4                                                                                            |
| uc012dnh.1                         | 9430015G10Rik | RIKEN cDNA 9430015G10 gene                                                                           | uc007lj.2   | Pcd11         | pterin $\alpha$ carbinolamine dehydratase/dimerization cofactor of hepatocyte nuclear factor 1 alpha (T |
| uc008dyi.1                         | 9430020K01Rik | RIKEN cDNA 9430020K01 gene                                                                           | uc009ifg.1  | Pkd2          | protein kinase D2                                                                                       |
| uc009boc.1                         | 9530077C05Rik | RIKEN cDNA 9530077C05 gene                                                                           | uc008ygg.2  | Plkg2         | protein kinase, cAMP-dependent, type II                                                                 |
| uc009ay.2                          | 9930019J23Rik | RIKEN cDNA 9930019J23 gene                                                                           | uc008trcs.1 | Rac5a         | RAC5a homolog B (S. cerevisiae)                                                                         |
| uc007vat.1                         | A330099N23Rik | RIKEN cDNA A330099N23 gene                                                                           | uc007k4r.2  | Tax14         | testis expressed gene 14                                                                                |
| uc009kg.2                          | A430078G23Rik | RIKEN cDNA A430078G23 gene                                                                           | uc007elv.1  | Taxln         | taxilin beta                                                                                            |
| uc008lpx.2                         | A530058N18Rik | RIKEN cDNA A530058N18 gene                                                                           | uc007ajw.2  | Mss11         | MSS11 mitochondrial translational activator                                                             |
| uc0077ag.1                         | A887161       | expressed sequence A887161                                                                           |             |               |                                                                                                         |
| uc008lqg.1                         | Aas2          | alanine tRNA synthetase-2, mitochondrial (putative)                                                  |             |               |                                                                                                         |
| uc0077nj.1                         | Abcc1         | ATP-binding cassette, sub-family C (CFTR/MRP), member 1                                              |             |               |                                                                                                         |
| uc009jfs.2                         | Abhd14b       | abhydrolase domain containing 14b                                                                    |             |               |                                                                                                         |
| uc007pwj.1                         | Acot13        | acyl-CoA thioesterase 13                                                                             |             |               |                                                                                                         |
| uc008mwe.1                         | Acot8         | acyl-CoA thioesterase 8                                                                              |             |               |                                                                                                         |
| uc009bp.2                          | Acv1c         | activin A receptor, type 1C                                                                          |             |               |                                                                                                         |
| uc008m.1                           | Ada           | adenosine deaminase-like                                                                             |             |               |                                                                                                         |
| uc009il.2                          | Adam9         | a disintegrin and metalloproteinase domain 9 (meltrin gamma)                                         |             |               |                                                                                                         |
| uc009mfs.1                         | Adams17       | a disintegrin-like and metalloproteinase (reprolysin type) with thrombospondin type 1 motif, 17      |             |               |                                                                                                         |
| uc012gk.1                          | Adams18       | a disintegrin-like and metalloproteinase (reprolysin type) with thrombospondin type 1 motif, 18      |             |               |                                                                                                         |
| uc0077l2.2                         | Adgrm         | ADP-ribose-CDP-alcohol diphosphatase, manganese dependent                                            |             |               |                                                                                                         |
| uc009m.1                           | Adp2          | AE binding protein 2                                                                                 |             |               |                                                                                                         |
| uc009m.2                           | Alg31         | AFG31/Alpase family gene 3j-like 1 (yeast)                                                           |             |               |                                                                                                         |
| uc012gk.1                          | Aga           | asparylglucosaminidase                                                                               |             |               |                                                                                                         |
| uc012dk.1                          | Ago3          | argonate RISC catalytic subunit 3                                                                    |             |               |                                                                                                         |
| uc007jft.1                         | Ahnk2         | AHNK nucleoprotein 2                                                                                 |             |               |                                                                                                         |
| uc008bcw.1                         | Ai314978      | O-acyl-ADP-ribose deacylase 1                                                                        |             |               |                                                                                                         |
| uc009jg.2                          | Ai845148      | expressed sequence AI845148                                                                          |             |               |                                                                                                         |
| uc008wct.1                         | AK002390      | RIKEN cDNA 2700038G22 gene                                                                           |             |               |                                                                                                         |
| uc008jap.1                         | AK011205      | RNA binding motif, single stranded interacting protein 1                                             |             |               |                                                                                                         |
| uc008wvd.1                         | AK013453      | RIKEN cDNA CS30008M17 gene                                                                           |             |               |                                                                                                         |
| uc008kce.1                         | AK013593      | RIKEN cDNA 1700011J10 gene                                                                           |             |               |                                                                                                         |
| uc009hml.1                         | AK031861      | RIKEN cDNA 6330420H09 gene                                                                           |             |               |                                                                                                         |
| uc0077m.1                          | AK032803      | RIKEN cDNA A430105G06 gene                                                                           |             |               |                                                                                                         |
| uc0078el.1                         | AK041998      | predicted gene, 16894                                                                                |             |               |                                                                                                         |
| uc008neh.1                         | AK042610      | cDNA sequence BC052486                                                                               |             |               |                                                                                                         |
| uc008sav.1                         | AK044089      | predicted gene 12408                                                                                 |             |               |                                                                                                         |
| uc008llh.1                         | AK045643      | RIKEN cDNA B230217C12 gene                                                                           |             |               |                                                                                                         |
| uc0077m.1                          | AK045811      | AK078063                                                                                             |             |               |                                                                                                         |
| uc0077mh.1                         | AK046150      | predicted gene, 16677                                                                                |             |               |                                                                                                         |
| uc007bed.1                         | AK046160      | DnaJ (Hsp40) homolog, subfamily B, member 12                                                         |             |               |                                                                                                         |
| uc008wru.1                         | AK046351      | RIKEN cDNA 4921504A21 gene                                                                           |             |               |                                                                                                         |
| uc008iel.1                         | AK048013      |                                                                                                      |             |               |                                                                                                         |
| uc009qg.1                          | AK048662      | RIKEN cDNA A03001D20 gene                                                                            |             |               |                                                                                                         |
| uc0077m.1                          | AK050069      | predicted gene, 20319                                                                                |             |               |                                                                                                         |
| uc012gpi.1                         | AK077428      |                                                                                                      |             |               |                                                                                                         |
| uc009pdt.1                         | AK078316      | RIKEN cDNA C030014I23 gene                                                                           |             |               |                                                                                                         |
| uc008ll.1                          | AK084494      |                                                                                                      |             |               |                                                                                                         |
| uc0077m.1                          | AK131739      | RIKEN cDNA 1700027A07 gene                                                                           |             |               |                                                                                                         |
| uc008lzo.1                         | AK133008      |                                                                                                      |             |               |                                                                                                         |
| uc009qz.2                          | AK134828      |                                                                                                      |             |               |                                                                                                         |
| uc008oqa.1                         | AK140446      | predicted gene 2464                                                                                  |             |               |                                                                                                         |
| uc008gyu.1                         | AK144267      | predicted gene 12522                                                                                 |             |               |                                                                                                         |
| uc0077g.2                          | AK156477      | DNA segment, Chr 10, Brigham & Women's Genetics 1070 expressed                                       |             |               |                                                                                                         |
| uc0077py.1                         | AK160548      | predicted gene 11974                                                                                 |             |               |                                                                                                         |
| uc009m.2                           | AK202301      |                                                                                                      |             |               |                                                                                                         |
| uc009ams.2                         | Alg13         | asparagine-linked glycosylation 13                                                                   |             |               |                                                                                                         |
| uc008rdx.1                         | Alg14         | asparagine-linked glycosylation 14                                                                   |             |               |                                                                                                         |
| uc009jc.2                          | Alg8          | asparagine-linked glycosylation 8 (alpha-1,3-glucosyltransferase)                                    |             |               |                                                                                                         |
| uc011wjc.1                         | Amer3         | APC membrane recruitment 3                                                                           |             |               |                                                                                                         |
| uc009mnc.1                         | Ammrc1        | Aipori syndrome, mental retardation, midface hypoplasia and elliptocytosis chromosomal region gene 1 |             |               |                                                                                                         |
| uc009p.1                           | Ant           | antigen receptor                                                                                     |             |               |                                                                                                         |
| uc007mx.1                          | Arkkd1b       | arkyrin repeat and death domain containing 1B                                                        |             |               |                                                                                                         |
| uc011xk.1                          | Arkkd24       | arkyrin repeat domain 24                                                                             |             |               |                                                                                                         |
| uc008qng.1                         | Arkkd34a      | arkyrin repeat domain 34A                                                                            |             |               |                                                                                                         |
| uc011wvj.1                         | Arnkf1        | arkyrin repeat and zinc finger domain containing 1                                                   |             |               |                                                                                                         |
| uc0077y.2                          | Arp7          | arpor protein complex ARP-1, gamma 2 subunit                                                         |             |               |                                                                                                         |
| uc008mb.1                          | Arp81         | adaptor-related protein 5 complex, alpha 1 subunit                                                   |             |               |                                                                                                         |
| uc007gk.1                          | Arp2          | adaptor protein, phosphotyrosine interaction, PH domain and leucine zipper containing 2              |             |               |                                                                                                         |
| uc008lqd.2                         | Aqr           | aquarins                                                                                             |             |               |                                                                                                         |
| uc007wh.1                          | Arc           | activity regulated cytoskeletal-associated protein                                                   |             |               |                                                                                                         |
| uc009emo.1                         | Arhgd1b       | Rho, GDP dissociation inhibitor (GDI) beta                                                           |             |               |                                                                                                         |
| uc0079y.2                          | Arnt2         | armadillo repeat containing 2                                                                        |             |               |                                                                                                         |
| uc008lgs.2                         | Arnt          | aryl hydrocarbon receptor nuclear translocator                                                       |             |               |                                                                                                         |
| uc009anc.2                         | Arp1b         | actin related protein 2/3 complex, subunit 1B                                                        |             |               |                                                                                                         |
| uc012grw.1                         | Arv1          | ARV1 homolog (yeast)                                                                                 |             |               |                                                                                                         |
| uc0077px.1                         | Ash3          | arkyrin repeat and SOCS box-containing 13                                                            |             |               |                                                                                                         |
| uc011p2.1                          | Ash8          | arkyrin repeat and SOCS box-containing 8                                                             |             |               |                                                                                                         |
| uc0077v.2                          | Atga2         | ATP synthase mitochondrial F1 complex assembly factor 2                                              |             |               |                                                                                                         |
| uc008bdn.2                         | Axin1         | axin 1                                                                                               |             |               |                                                                                                         |
| uc009vor.2                         | B330016D10Rik | RIKEN cDNA B330016D10 gene                                                                           |             |               |                                                                                                         |
| uc0077g.2                          | B3grt2        | UDP-GlcNAc:betaGal beta-1,3-N-acetylglucosaminyltransferase 2                                        |             |               |                                                                                                         |
| uc0077m.1                          | B9t1          | B9 protein domain 1                                                                                  |             |               |                                                                                                         |
| uc0077m.1                          | Bcl11         | BTB and CNC homology 1                                                                               |             |               |                                                                                                         |
| uc009sek.1                         | BC003348      | sestrin 3                                                                                            |             |               |                                                                                                         |
| uc0077ag.1                         | BC038328      | zinc finger protein 708                                                                              |             |               |                                                                                                         |
| uc008nah.1                         | BC040804      |                                                                                                      |             |               |                                                                                                         |
| uc009seg.2                         | BC048546      | cDNA sequence BC048546                                                                               |             |               |                                                                                                         |
| uc008lq.2                          | BC052040      | cDNA sequence BC052040                                                                               |             |               |                                                                                                         |
| uc009au.1                          | BC062895      |                                                                                                      |             |               |                                                                                                         |
| uc008lto.2                         | Bcan          | brevican                                                                                             |             |               |                                                                                                         |
| uc0077xp.2                         | Bcdin3d       | BCDIN3 domain containing                                                                             |             |               |                                                                                                         |
| uc009sq.2                          | Bcor          | BCL6 interacting corepressor                                                                         |             |               |                                                                                                         |
| uc0077m.1                          | Bcs11         | BCS11-ike (yeast)                                                                                    |             |               |                                                                                                         |
| uc012sk.1                          | Bclaf1        | beaded filament structural protein 1, in lens-CPD4                                                   |             |               |                                                                                                         |
| uc0077m.1                          | Bfl1          | BRF1 homolog, subunit of RNA polymerase III transcription initiation factor IIIB (S. cerevisiae)     |             |               |                                                                                                         |
| uc0077m.1                          | Bld17         | BTB (POZ) domain containing 17                                                                       |             |               |                                                                                                         |
| uc007ez.1                          | Bves          | blood vessel epicardial substance                                                                    |             |               |                                                                                                         |
| uc008yaf.2                         | C130026L21Rik | RIKEN cDNA C130026L21 gene                                                                           |             |               |                                                                                                         |
| uc008ba.2                          | Casp1         | caspase activity and apoptosis inhibitor 1                                                           |             |               |                                                                                                         |
| uc012eg.1                          | Cas11c        | calcium channel, voltage-dependent, L type, alpha 1C subunit                                         |             |               |                                                                                                         |
| uc008bl.1                          | Camkmt        | calmodulin-lysine N-methyltransferase                                                                |             |               |                                                                                                         |
| uc0077m.1                          | Caps1         | calyphosine-like                                                                                     |             |               |                                                                                                         |
| uc009fb.2                          | Car12         | carbonic anhydrase 12                                                                                |             |               |                                                                                                         |
| uc0077m.1                          | Cartp         | CART prepropeptide                                                                                   |             |               |                                                                                                         |
| uc009m.1                           | Cas3          | caspase 3                                                                                            |             |               |                                                                                                         |
| uc008hy.1                          | Casp7         | caspase 7                                                                                            |             |               |                                                                                                         |
| uc007wv.1                          | Cbx7          | chromobox 7                                                                                          |             |               |                                                                                                         |



|                                          |         |                                                                                                    |
|------------------------------------------|---------|----------------------------------------------------------------------------------------------------|
| uc008aur.1                               | Gja4    | gap junction protein, alpha 4                                                                      |
| uc008qae.1:uc009qad.1:uc009qac.1:uc000   | Gloc    | glucuronyl C5-epimerase                                                                            |
| uc0077k.1:uc0077l.1                      | Gm12948 | predicted gene 12948                                                                               |
| uc012ab.1:uc008aun.1                     | Gm12942 | predicted gene 12942                                                                               |
| uc012gfl.1                               | Gm684   | predicted gene 684                                                                                 |
| uc011xwv.1                               | Gm9767  | predicted gene 9767                                                                                |
| uc0077fm.1:uc0077nl.1                    | Gm9866  | predicted gene 9866                                                                                |
| uc012baw.1:uc008qpc.1:uc008qob.1:uc008q  | Golga1  | golgi autoantigen, golgin subfamily a, 1                                                           |
| uc008qf.1                                | Golga11 | GC-rich promoter binding protein 1-like 1                                                          |
| uc008del.1:uc008delh.1                   | Gpr108  | G protein-coupled receptor 108                                                                     |
| uc0089hx.2:uc012gbr.1                    | Gpr124  | G protein-coupled receptor 124                                                                     |
| uc012zpx.1:uc008qj2                      | Gpr171  | G protein-coupled receptor 171                                                                     |
| uc008uqh.1                               | Gpr173  | G-protein coupled receptor 173                                                                     |
| uc008rzz.2                               | Gpr96   | G-protein coupled receptor 96                                                                      |
| uc008qgl.1:uc008qpm.1                    | Gpr99   | G protein-coupled receptor 99                                                                      |
| uc008eas.1:uc008easf.1                   | Greb11  | growth regulation by estrogen in breast cancer-like                                                |
| uc012eeh.1:uc008zvy.1:uc008zvy.1:uc008   | Gtf2id1 | general transcription factor II 1 repeat domain-containing 1                                       |
| uc007azp.1                               | Gtf3c3  | general transcription factor IIIC, polypeptide 3                                                   |
| uc0089tp.1:uc0089tw.1                    | Haus2   | HAUS augmin-like complex, subunit 2                                                                |
| uc012gfo.1:uc009mch.2:uc009mcg.2         | Haus8   | HAUS augmin-like complex, subunit 8                                                                |
| uc0077k.1                                | Hba-a2  | hemoglobin alpha, adult chain 2                                                                    |
| uc009qsz.1:uc009qta.1                    | Hotr2   | hypocretin (orexin) receptor 2                                                                     |
| uc0089yp.1:uc0089yq.1                    | Hdac8   | histone deacetylase 8                                                                              |
| uc0077wl.1                               | Hes1    | hairy and enhancer of split 1 (Drosophila)                                                         |
| uc0077gq.1:uc011xwr.1                    | Hfzbh   | 3-hydroxyisobutyryl-Coenzyme A hydrolase                                                           |
| uc0077g.1                                | Hhps1   | human immunodeficiency virus type 1 enhancer binding protein 1                                     |
| uc0089uc.1                               | Hmg95   | high-mobility group nucleosome binding domain 5                                                    |
| uc0089br.1:uc0088bq.1:uc0088bs.1:uc0088b | Hmgxb3  | HMG box domain containing 3                                                                        |
| uc0077bd.2:uc0077bc.1                    | Homez   | homeodomain leucine zipper-encoding gene                                                           |
| uc0089gt.1:uc0089gz.2:uc0089gh.2:uc0089g | Hps5    | Hernancky-Pudlak syndrome 5 homolog (human)                                                        |
| uc0077uj.1                               | Hv      | hairless                                                                                           |
| uc0077hu.2                               | Htr1a   | 5-hydroxytryptamine (serotonin) receptor 1A                                                        |
| uc011wqx.1                               | Htr5b   | 5-hydroxytryptamine (serotonin) receptor 5B                                                        |
| uc008zku.1:uc008zkw.1:uc008zkw.1         | Hvcm1   | hydrogen voltage-gated channel 1                                                                   |
| uc0089ml.1:uc0089mu.1:uc012kxk.1         | Ifitm10 | interferon induced transmembrane protein 10                                                        |
| uc0077wo.1:uc0077wos.1                   | IFT2    | intraflagellar transport 27                                                                        |
| uc0089ag.1                               | IFT4    | intraflagellar transport 74                                                                        |
| uc0077ai.1                               | Igf1p3  | insulin-like growth factor binding protein 3                                                       |
| uc0089ad.2:uc0089ac.2:uc0089ac2.2:uc008  | Igfbp5  | immunoglobulin superfamily, member 5/Purkinje cell protein 4                                       |
| uc012kxk.1:uc0089pe.2:uc0089oz.2:uc0089  | Ikbkg   | inhibitor of kappaB kinase gamma                                                                   |
| uc012erz.1:uc0089dj2                     | IL17ra  | interleukin 17 receptor A                                                                          |
| uc011wep.1:uc0077cen.1                   | Ing5    | inhibitor of growth family, member 5                                                               |
| uc0077m.1                                | Inhba   | inhibin beta-A                                                                                     |
| uc0089mh.2                               | Insm1   | insulinoma-associated 1                                                                            |
| uc011yze.1:uc0077qj.1                    | Ippk    | inositol 1,3,4,5,6-pentakisphosphate 2-kinase                                                      |
| uc0077z1.2:uc0077zk.2:uc0077zm.1:uc0077z | Irf9    | interferon regulatory factor 9                                                                     |
| uc0089ml.2:uc012kxy.1                    | Ism1    | islet11 homolog (zebrafish)                                                                        |
| uc012erz.1:uc0089de.1:uc0089dc.1:uc0089  | Itp2    | integrin alpha FG-GAP repeat containing 2                                                          |
| uc0089bd.1:uc0089bd.1:uc0089bc.1         | Itpa6   | integrin alpha 6                                                                                   |
| uc0077dw.1:uc0077du.1:uc0077dx.1:uc0077  | Jmjd4   | jumonji domain containing 4                                                                        |
| uc0089ty.1:uc0089tx.1:uc0089ty.1:uc0089  | Katnal2 | katanin p60 subunit A-like 2                                                                       |
| uc0089bv.1                               | Kcna1   | potassium voltage-gated channel, shaker-related subfamily, member 1                                |
| uc0089gy.1                               | Kcnj11  | potassium inwardly rectifying channel, subfamily J, member 11                                      |
| uc0089gi.1                               | Kcnj14  | potassium inwardly-rectifying channel, subfamily J, member 14                                      |
| uc0077aq.2:uc011wio.1:uc0089uzv.1        | Kcnq5   | potassium voltage-gated channel, subfamily Q, member 5                                             |
| uc0089qu.1:uc0089quv.1                   | KIR8    | Kruppel-like factor 8                                                                              |
| uc0089nj.1:uc0089nqm.1                   | KH36    | kelch-like 36                                                                                      |
| uc0089eb.1                               | KH42    | kelch-like 42                                                                                      |
| uc0077be.1                               | Klf12   | keratin 12                                                                                         |
| uc0089ma.1                               | Lamtr3  | late endosomal/lysosomal adaptor, MAPK and MTOR activator 3                                        |
| uc0089ng.2                               | Lbh     | limb-bud and heart                                                                                 |
| uc0077bd.1:uc0077bc.1:uc0077bb.1:uc0077  | Ldb3    | LIM domain binding 3                                                                               |
| uc0089kn.1:uc0089kxm.1                   | Lg2     | leucine-rich repeat LGI family, member 2                                                           |
| uc0089ah.1                               | Lig4    | ligase IV, DNA, ATP-dependent                                                                      |
| uc0089uh.1                               | Lix1    | Lix 1-like                                                                                         |
| uc012bdc.1:uc0089ey.1                    | Lmnb1   | lamin B1                                                                                           |
| uc0077qf.2                               | Lpar6   | lysophosphatidic acid receptor 6                                                                   |
| uc0089zb.2:uc0089za.1:uc0089zc.2         | Lrn1    | leucine rich repeat and fibronectin type III domain containing 1                                   |
| uc0077ge.1                               | Lrrc20  | leucine rich repeat containing 20                                                                  |
| uc0077rj.1:uc0077rb.1:uc0077rb.1:uc0077  | Lrrk2   | leucine-rich repeat kinase 2                                                                       |
| uc0077kx.1:uc0077ki.1                    | Lrrtk3  | leucine rich repeat transmembrane neuronal 3                                                       |
| uc0089iv.1                               | Lurap11 | leucine rich adaptor protein 1-like                                                                |
| uc0089jz.1:uc012bvf.1                    | Lypd8b  | LY6PLAUR domain containing 6B                                                                      |
| uc011xuy.1:uc011xuz.1                    | Lym7    | LYR motif containing 7                                                                             |
| uc0089bu.1:uc0089buc.1                   | Mad22   | MAD2 mitotic arrest deficient-like 2                                                               |
| uc012zpx.1                               | Magsb16 | melanoma antigen family B, 16                                                                      |
| uc0089eh.2:uc0089eb.2:uc0089ej.2         | Magt1   | magnesium transporter 1                                                                            |
| uc0077yc.1                               | Map3k3  | mitogen-activated protein kinase kinase kinase 3                                                   |
| uc0077co.2:uc0077cp.2                    | Map3k9  | mitogen-activated protein kinase kinase kinase 9                                                   |
| uc0077fp.2                               | Mapk11  | mitogen-activated protein kinase 11                                                                |
| uc0089fr.1                               | Mcar    | melanocortin 4 receptor                                                                            |
| uc0089as.1                               | Mcn7    | mitochondrial maintenance deficient 7 (S. cerevisiae)                                              |
| uc0077cd.1                               | Med6    | mediator of RNA polymerase II transcription, subunit 6 homolog (yeast)                             |
| uc0089he.1:uc0089hj.1:uc0089hi.1:uc0089h | Mei2a   | myocyte enhancer factor 2A                                                                         |
| uc0089ts.1:uc0089tu.1:uc0089tt.1         | Mest    | mesoderm specific transcript                                                                       |
| uc011xzd.1:uc011xyz.1:uc0077kc.1:uc0077  | Meth16  | methyltransferase like 16                                                                          |
| uc0089et.1:uc0089ev.1:uc0089ew.1:uc0089  | Meth20  | methyltransferase like 20                                                                          |
| uc0077ex.1:uc0077ex.1:uc0077ex.1         | Meth6   | methyltransferase like 6                                                                           |
| uc0077bu.1:uc011wyt.1:uc0077bv.1:uc007   | Mfsd7b  | major facilitator superfamily domain containing 7B                                                 |
| uc0077ar.2:uc0077au.2:uc0077av.2:uc0077  | Mga14a  | mannose acetylglucosaminyltransferase 4, isoenzyme A                                               |
| uc011xmt.1:uc0077yc.2:uc0077yd.2:uc007   | Mga14c  | mannosyl (alpha-1,3)-glycoprotein beta-1,4-N-acetylglucosaminyltransferase, isoenzyme C (putative) |
| uc0077zw.1                               | Mis18a  | MIS18 kinetochore protein homolog A (S. pombe)                                                     |
| uc0089de.1:uc0089dae.1:uc012zpb.1:uc008  | Mks1b   | MOS kinase activator 1B                                                                            |
| uc0089qg.1                               | Mphosp6 | M phase phosphoprotein 6                                                                           |
| uc0089oz.1:uc012bev.1                    | Mro     | maestro                                                                                            |
| uc0077pn.1                               | Mps27   | mitochondrial ribosomal protein S27                                                                |
| uc0077pw.1                               | Mrs2    | MRS2 magnesium homeostasis factor homolog (S. cerevisiae)                                          |
| uc0077vm.2:uc0077vl.2:uc0077vn.2:uc007   | Msa2    | musashi RNA-binding protein 2                                                                      |
| uc0077cb.1                               | Mst3l2  | mate-specific lethal 3-like 2 (Drosophila)                                                         |
| uc0089ra.2:uc0089rc.2:uc0089rb.2         | Mt1     | metal response element binding transcription factor 1                                              |
| uc0089ag.1:uc0089af.1:uc0089ae.1:uc0089  | Mtg2    | mitochondrial ribosome associated GTPase 2                                                         |
| uc011wzu.1:uc0077ehj.2:uc0077ehk.2       | Mthfd11 | methylenelethylthiolate dehydrogenase (NADP+ dependent) 1-like                                     |
| uc0089yp.1:uc0089yo.1                    | Mthfd21 | methylenelethylthiolate dehydrogenase (NADP+ dependent) 2-like                                     |
| uc0089qf.1:uc0089qgd.1                   | Mtmr10  | myotubularin related protein 10                                                                    |
| uc0077ah.1                               | Mtmr9   | myotubularin related protein 9                                                                     |
| uc0089mv.2                               | Narp    | N-acetylneuraminic acid phosphatase                                                                |
| uc0077ng.1:uc0077ng.1                    | Nat9    | N-acetyltransferase 9 (GCN5-related, putative)                                                     |
| uc0089fv.2:uc0089fw.2:uc0089fx.2         | Ndsl4   | N-deacetylase/N-sulfotransferase (heparin glucosaminyl) 4                                          |
| uc0089m.2                                | Necap2  | NECAP endocytosis associated 2                                                                     |
| uc0077gk.2:uc0077ge.2                    | Necp9   | neural precursor cell expressed, developmentally down-regulated gene 9                             |
| uc011wfb.1:uc0077cvn.1:uc0077cvo.1       | Nek7    | NIMA (never in mitosis gene a)-related expressed kinase 7                                          |
| uc0089tb.2:uc0089tc.1:uc0089td.1         | Nexn    | nexlin                                                                                             |
| uc012qju.1:uc012qjz.1:uc012qjz.1:uc012qj | Ntstc2  | nuclear factor of activated T cells, cytoplasmic, calcineurin dependent 2                          |
| uc0089cq.2:uc0089cp.2:uc0089cv.2:uc008   | Ntys    | nuclear transcription factor-Y alpha                                                               |
| uc011ypl.1:uc0077sk.1                    | Npb     | neurigin                                                                                           |
| uc0077ep.2                               | Nhlc1   | NHL, repeat containing 1                                                                           |
| uc0077gw.1                               | Ninj1   | ninjurin 1                                                                                         |
| uc0089gn.1:uc0089go.1                    | Nipa3   | NIPA-like domain containing 3                                                                      |
| uc0089mk.1:uc0089ml.1                    | Nmd3    | NMD3 homolog (S. cerevisiae)                                                                       |
| uc0089ex.1                               | Nop14   | NOP14 nucleolar protein                                                                            |
| uc0089gm.1:uc0089gpo.1                   | Nos3c2  | nos3 2                                                                                             |
| uc0077mv.1                               | Npb1    | neuronal pentraxin 1                                                                               |
| uc0089jx.2:uc012bvn.1:uc0089jy.2:uc0089  | Nr4a2   | nuclear receptor subfamily 4, group A, member 2                                                    |
| uc0089kg.1                               | Nrap    | Notch-regulated ankyrin repeat protein                                                             |
| uc0077yg.1:uc0077yj.1:uc0077yk.1:uc0077  | Nros    | negative regulator of reactive oxygen species                                                      |
| uc0089kr.1:uc0089ks.1:uc0089kt.1:uc0089  | Nsun7   | NCL1/NOP25/Sun domain family, member 7                                                             |
| uc0089dz.2:uc012zey.1:uc012hex.1         | NES     | neurotrophin 3                                                                                     |
| uc0089ai.2:uc0089am.2:uc0089aj.2:uc0089  | Ntrn1   | netrin G1                                                                                          |
| uc012xmd.1:uc0089ig.1                    | Ntr1    | neurotensin receptor 1                                                                             |
| uc0089gz.1                               | Nud22   | nudix (nucleoside diphosphate linked moiety X)-type motif 22                                       |
| uc0089gw.2                               | Nup62   | nucleoporin 62                                                                                     |

|                                         |              |                                                                                                                 |
|-----------------------------------------|--------------|-----------------------------------------------------------------------------------------------------------------|
| uc012hpq.1.uc009jur.2                   | Nxt2         | nuclear transport factor 2-like export factor 2                                                                 |
| uc007mz.2                               | Olfm2b       | olfactomedin-like 2B                                                                                            |
| uc007za.1                               | Olig1        | oligodendrocyte transcription factor 1                                                                          |
| uc008mf.1                               | Oncu2        | one cut domain, family member 2                                                                                 |
| uc007fx.1                               | Osgpe        | O-sialoglycoprotein endopeptidase                                                                               |
| uc007azb.1.uc007azd.1.uc007             | Osgpep1      | O-sialoglycoprotein endopeptidase-like 1                                                                        |
| uc008rq.1                               | Ovyp1        | oviductal glycoprotein 1                                                                                        |
| uc007yq.2.uc007yq.2.uc007yqh.2          | Oxnd1        | oxalodectate NAD-binding domain containing 1                                                                    |
| uc008ya.1.uc008yb.2.uc008yc.2.uc008y    | P2b2         | purinergic receptor P2X, ligand-gated ion channel, 2                                                            |
| uc008yq.1.uc008yr.1.uc008ys.1.uc008yt   | Pagr3        | progesterin and adipoO receptor family member III                                                               |
| uc012akb.1.uc012akb.1.uc008aj.1.uc012   | Park2        | Parkinson disease (autosomal recessive, juvenile) 2, parkin                                                     |
| uc009gs.1.uc009gt.1.uc009gu.1           | Parva        | parvin, alpha                                                                                                   |
| uc007fz.2                               | Pcbd1        | pletin 4 alpha carbinolamine dehydratase/dimethylization cofactor of hepatocyte nuclear factor 1 alpha (TCF1) 1 |
| uc007gz.1                               | Pcbd2        | pletin 4 alpha carbinolamine dehydratase/dimethylization cofactor of hepatocyte nuclear factor 1 alpha (TCF1) 2 |
| uc007h.2.uc011xgl.1.uc011xg.1.uc011x    | Pcdh15       | protocadherin 15                                                                                                |
| uc008ep.1                               | Pcdh13       | protocadherin beta 13                                                                                           |
| uc008gp.2.uc008gq.2.uc008gv.1           | Pcsk5        | proprotein convertase subtilisin/kexin type 5                                                                   |
| uc008az.2.uc008bd.2.uc008cb.2.uc008     | Pde1c        | phosphodiesterase 1C                                                                                            |
| uc012qpe.1.uc008dcd.2.uc009dce.1.uc008  | Pdzr3        | PDZ domain containing RING finger 3                                                                             |
| uc007eq.2.uc007ek.2.uc007es.2.uc007     | Phar2        | phosphatase and actin regulator 2                                                                               |
| uc008aj.2.uc008ak.2                     | PHD1         | PHD finger protein 10                                                                                           |
| uc009wb.2.uc009wa.2.uc009wc.2           | Phkg2        | phosphorylase kinase, gamma 2 (testis)                                                                          |
| uc008du.1                               | Pigf         | phosphatidylinositol glycan anchor biosynthesis, class F                                                        |
| uc008jv.1.uc008jw.1                     | Pip5k1       | phosphatidylinositol-4-phosphate 5-kinase-like 1                                                                |
| uc008za.1.uc008zb.1                     | Piw1         | piwi-like RNA-mediated gene silencing 1                                                                         |
| uc011xsl.1.uc007fkl.2.uc007gkl.2.uc011x | PlexA1       | plexstratin adenoma gene-like 1                                                                                 |
| uc008vz.1.uc008va.2.uc008vb.1           | Plexhm2      | pleckstrin homology domain containing, family M (with RUN domain) member 2                                      |
| uc009ar.1.uc009as.1                     | Plscr4       | phospholipid scramblase 4                                                                                       |
| uc009fp.1                               | PNMA-like 1  | PNMA-like 1                                                                                                     |
| uc007xw.1.uc011zxf.1                    | Pp3a3        | patatin-like phospholipase domain containing 3                                                                  |
| uc011xv.1.uc007yhl.1.uc007yil.1.uc011x  | Ppctb        | POC1 centriluar protein homolog B (Chlamydomonas)                                                               |
| uc012qj.1.uc009qz.2                     | Pold1        | polymerase (DNA directed), delta 1, catalytic subunit                                                           |
| uc007hfl.2.uc011xrl.1                   | Polm         | polymerase (DNA directed), mu                                                                                   |
| uc009ng.2.uc009nh.2.uc009nl.2           | Poli3e       | polymerase (RNA) III (DNA directed) polypeptide E                                                               |
| uc007fv.2.uc007fv.2                     | Pop1         | processing of precursor 1, ribonuclease PMRP family, (S. cerevisiae)                                            |
| uc009pu.1.uc009pu.1.uc009puv.1          | Ppdc         | phosphoribothymoylcysteine decarboxylase                                                                        |
| uc008us.1                               | Ppfe         | peptidylprolyl isomerase E (cyclophilin E)                                                                      |
| uc012qps.1.uc009gd.1                    | Ppim1m       | protein phosphatase 1M                                                                                          |
| uc008ep.1                               | Ppp13d       | protein phosphatase 1, regulatory subunit 3D                                                                    |
| uc007ec.1                               | Ppp2r5a      | protein phosphatase 2, regulatory subunit B (B56), alpha isoform                                                |
| uc008yy.1                               | Ppkabp       | protein kinase C, delta binding protein                                                                         |
| uc008vs.1                               | Prc1         | protein kinase C, iota                                                                                          |
| uc009gf.1.uc009gh.1.uc009gi.1.uc009     | Prrt1        | protein arginine N-methyltransferase 1                                                                          |
| uc008ach.1                              | Psmg1        | proteasome (prosome, macropain) assembly chaperone 1                                                            |
| uc007gv.1.uc007qw.1.uc007qy.1.uc007     | Ptch1        | patched homolog 1                                                                                               |
| uc008sl.1                               | Ptgd5        | prostaglandin D2 synthase (brain)                                                                               |
| uc009hu.1.uc009ip.1.uc009iq.1           | Pth1r        | parathyroid hormone 1 receptor                                                                                  |
| uc008ga.1                               | Ptin         | pleiotrophin                                                                                                    |
| uc008nu.1.uc008nv.1.uc008nz.1.uc008r    | Plprt        | protein tyrosine phosphatase, receptor type, T                                                                  |
| uc008ja.1                               | Ptx3         | pentraxin related gene                                                                                          |
| uc012baw.1.uc008wq.1.uc008wqn.1         | Pus7         | pseudouridylylase synthase 7 homolog (S. cerevisiae)                                                            |
| uc009nd.2.uc009ne.2                     | Pw12         | poltivirus receptor-related 2                                                                                   |
| uc008m.1                                | Pmp4         | peroxisomal membrane protein 4                                                                                  |
| uc008qs.1.uc008qt.1                     | Qcct         | glutaminyl-peptide cyclotransferase (glutaminyl cyclase)                                                        |
| uc008ed.1.uc008ee.1                     | Rab22a       | RAB22A, member RAS oncogene family                                                                              |
| uc009qz.1.uc009qa.1.uc009qb.1.uc012     | Rab27a       | RAB27A, member RAS oncogene family                                                                              |
| uc008ay.1                               | Rab42        | RAB42, member RAS oncogene family                                                                               |
| uc007ac.1                               | Rabif        | RAB interacting factor                                                                                          |
| uc009ym.1.uc009yl.1.uc008ygk.1          | Racgef1b     | RACGEF domain family, member 1B                                                                                 |
| uc012hp.1.uc008al.2                     | Rcc1d        | RCC1 domain containing 1                                                                                        |
| uc007pck.1                              | Rcor1        | REST corepressor 1                                                                                              |
| uc007taz.1.uc007oaa.1                   | Rdh11        | retinol dehydrogenase 11                                                                                        |
| uc007uc.1                               | Reep4        | receptor accessory protein 4                                                                                    |
| uc008er.1                               | Reps15       | RAB15 effector protein                                                                                          |
| uc012bay.1.uc008em.2.uc008em.2.uc008    | Reg3         | RAF-like, estrogen-regulated, growth-inhibitor                                                                  |
| uc011xv.1.uc007fp.2                     | Rhcf1f       | hombol1 family 1 (Drosophila)                                                                                   |
| uc007voe.1.uc011zsk.1.uc007vod.1.uc007  | Rhms2        | regulating synaptic membrane exocytosis 2                                                                       |
| uc012bax.1.uc008wq.1.uc008wqp.1         | Rht1         | RAD50 interactor 1                                                                                              |
| uc007qm.1.uc007qk.1.uc007qy.1           | Rhp1         | receptor (TNFRSF)-interacting serine-threonine kinase 1                                                         |
| uc007fr.2.uc007fr.2                     | Rhsa1h1      | ribonuclease H1 protein                                                                                         |
| uc007aj.1                               | Rhsah2b      | ribonuclease H2, subunit B                                                                                      |
| uc011wz.1.uc011wpy.1                    | Rhf152       | ring finger protein 152                                                                                         |
| uc009hp.1.uc009hi.1.uc012qbo.1.uc009f   | Rhf170       | ring finger protein 170                                                                                         |
| uc007zl.1.uc007zj.1                     | Rhf31        | ring finger protein 31                                                                                          |
| uc008wz.1.uc012dm.1.uc008wud.1.uc008    | Rhf32        | ring finger protein 32                                                                                          |
| uc008vl.1.uc008vu.1                     | Rhsa2        | regulation protein A2                                                                                           |
| uc008jp.1                               | Rflpm        | reprimo, TP53 dependent G2 arrest mediator candidate                                                            |
| uc012dq.1                               | Rps19-ps3    | ribosomal protein S19, pseudogene 3                                                                             |
| uc008vt.2.uc008vu.2                     | Rpp15        | ribosomal RNA processing 15 homolog (S. cerevisiae)                                                             |
| uc007zu.1                               | Rpp1b        | ribosomal RNA processing 1 homolog B (S. cerevisiae)                                                            |
| uc008rd.2.uc008re.2.uc008rdq.2.uc008r   | Rwd2b        | RWD domain containing 2B                                                                                        |
| uc007ac.2                               | Rwd3         | RWD domain containing 3                                                                                         |
| uc009ks.2                               | S100b        | S100 protein, beta polypeptide, neural                                                                          |
| uc011zsw.1.uc007vl.1.uc007vj.1          | S1pr5        | sphingosine-1-phosphate receptor 5                                                                              |
| uc007bn.2.uc007bn.2.uc007bp.1.uc007h    | Samd12       | sterile alpha motif domain containing 12                                                                        |
| uc008ym.1                               | Samd4        | sterile alpha motif domain containing 4                                                                         |
| uc011yxl.1.uc007kxv.2                   | Scarb2       | scaevenger receptor class B, member 2                                                                           |
| uc011xqs.1.uc007huf.2                   | Scgpp1       | serine carboxypeptidase 1                                                                                       |
| uc009ym.2.uc008yvo.2.uc012qap.1.uc00    | Sec14b3      | SEC14-like 3 (S. cerevisiae)                                                                                    |
| uc007pzz.1                              | Serp8        | SUMO/sentrin specific peptidase 8                                                                               |
| uc007gq.1.uc007gd.1.uc007ge.1.uc007g    | Serpinb9     | serine (or cysteine) peptidase inhibitor, clade B, member 9                                                     |
| uc017ps.1.uc007ip.1.uc007ps.1           | Serpf2       | SEPTA domain containing 2                                                                                       |
| uc007yh.1.uc007yt.2.uc007ys.2           | Sh3pdc2b     | SH3 and PX domains 2B                                                                                           |
| uc009ve.1.uc009vfl.1.uc009vqv.1         | Shisa9       | shisa homolog 9 (Xenopus laevis)                                                                                |
| uc008ja.1                               | Siae         | sialic acid acetyltransferase                                                                                   |
| uc007fk.2.uc007fke.2                    | Sia2         | seven in absentia 2                                                                                             |
| uc007pw.2.uc007pw.2                     | Sirt1        | sirtuin 1                                                                                                       |
| uc007je.2.uc007ja.2                     | Siva1        | SIVA1, apoptosis-inducing factor                                                                                |
| uc007bn.1                               | Slc16a11     | solute carrier family 16 (monocarboxylic acid transporters), member 11                                          |
| uc007gsl.1                              | Slc16a14     | solute carrier family 16 (monocarboxylic acid transporters), member 14                                          |
| uc012qk.1.uc009qpo.1.uc009qp.1          | Slc17a5      | solute carrier family 17 (anion/sugar transporter), member 5                                                    |
| uc007gsl.1.uc007gsk.2                   | Slc17a8      | solute carrier family 17 (sodium-dependent inorganic phosphate cotransporter), member 8                         |
| uc007vc.2.uc007vd.2.uc007ve.1.uc007h    | Slc19a1      | solute carrier family 19 (bilate transporter), member 1                                                         |
| uc008pl.2.uc008pm.2.uc008pn.2           | Slc22a15     | solute carrier family 22 (organic anion/cation transporter), member 15                                          |
| uc007uc.2                               | Slc22a5      | solute carrier family 22 (organic cation transporter), member 5                                                 |
| uc009ic.2                               | Slk25a15     | solute carrier family 25 (mitochondrial carrier ornithine transporter), member 15                               |
| uc012ad.1.uc008db.1                     | Slc30a6      | solute carrier family 30 (zinc transporter), member 6                                                           |
| uc008nt.2                               | Slc30a7      | solute carrier family 30 (zinc transporter), member 7                                                           |
| uc008y.2                                | Slc30a1      | solute carrier family 30 (sugar transporter), member 1                                                          |
| uc009rs.2.uc009rt.2.uc009rs.2.uc009r    | Slc37a5      | solute carrier family 37, member 5 opposite strand                                                              |
| uc007mp.1.uc007mq.1                     | Slc3d3r1     | solute carrier family 3 (sodium/hydrogen exchanger), member 3 regulator 1                                       |
| uc008qe.2.uc008qd.1.uc012zba.1          | Smad7        | SMAD family member 7                                                                                            |
| uc007wz.2.uc007vz.2.uc007vz.2.uc007     | Smc7i        | Smith-Magenis syndrome chromosome region, candidate 7-like (human)                                              |
| uc007zy.1                               | Smn11        | small integral membrane protein 11                                                                              |
| uc008ba.1                               | Smn3         | small integral membrane protein 3                                                                               |
| uc007wd.2                               | Shng10       | small nuclear RNA host gene (non-protein coding) 10                                                             |
| uc011zqz.1                              | Shox172      | small nuclear RNA, C/D box 72                                                                                   |
| uc012cor.1.uc012cos.1                   | Sox2.Mir1897 | SOX2 overlapping transcript (non-protein coding)/microRNA 1897                                                  |
| uc008kc.2                               | Sp9          | trans-acting transcription factor 9                                                                             |
| uc007vm.1.uc007vo.1.uc007vp.1           | Spag1        | sperm associated antigen 1                                                                                      |
| uc008r.1.uc012cag.1.uc008ri.1           | Spast1       | spermatogenesis associated 1                                                                                    |
| uc009id.1                               | Spcc3        | signal peptidase complex subunit 3 homolog (S. cerevisiae)                                                      |
| uc008ih.2.uc008ij.2.uc008il.2           | Sppl1        | speckle-type POZ protein-like                                                                                   |
| uc009px.2                               | Sply2d1      | SPT2, Suppressor of Ty, domain containing 1 (S. cerevisiae)                                                     |
| uc012ayk.1.uc008du.2.uc012ayj.1.uc008   | Srdc1        | S1 RNA binding domain 1                                                                                         |
| uc007zu.1.uc007xt.1                     | Sr1          | sarcosinemia                                                                                                    |
| uc008nw.1                               | Srn1         | sulfiredoxin 1 homolog (S. cerevisiae)                                                                          |
| uc007mp.1.uc007mq.1.uc011yfa.1          | Sstr2        | somatostatin receptor 2                                                                                         |
| uc009hb.1                               | Star         | steroidogenic acute regulatory protein                                                                          |
| uc007gc.1.uc007ge.1.uc007gd.1           | Start3       | START domain containing 3                                                                                       |
| uc008ej.1.uc008ej.1                     | Start4       | START-related lipid transfer (START) domain containing 4                                                        |

|                                           |          |                                                                        |
|-------------------------------------------|----------|------------------------------------------------------------------------|
| uc009dq1                                  | Stard5   | SIAR-related lipid transfer (START) domain containing 5                |
| uc0079m.2:uc0079m.2:uc0079m.1             | Stab5b   | signal transducer and activator of transcription 5B                    |
| uc0089ka.1:uc0089ka.1:uc0089kcp.1         | Stad1    | starch binding domain 1                                                |
| uc011zr.1:uc0074z.1                       | Stk3     | serine/threonine kinase 3                                              |
| uc0079h.1:uc0079h.1:uc0079h.1:uc0079h.1   | Stx8     | syntaxin 8                                                             |
| uc0089ka.1:uc0089kpb.2                    | Sulf2b1  | sulfotransferase family, cytosolic, 2B, member 1                       |
| uc0089df.2                                | Sumf1    | sulfatase modifying factor 1                                           |
| uc0089ca.1:uc0089cap.1:uc0089caf.1:uc0089 | Sup3     | suppressor of Ty 3                                                     |
| uc0089nc.2:uc0089ncq.2:uc0089ncr.1        | Swc9b1   | suppressor of vanguard 3-9 homolog 1 (Drosophila)                      |
| uc0089nc.2                                | Swasp1   | SWIM type zinc finger 7 associated protein 1                           |
| uc0079ds.1:uc0079dfr.1                    | Syndg11  | synapse differentiation inducing 1 like                                |
| uc0089ky.2                                | Tacr3    | tachykinin receptor 3                                                  |
| uc0089ka.2:uc0089kps.2:uc0089kt2:uc012    | Tars2    | threonyl-tRNA synthetase 2, mitochondrial (putative)                   |
| uc0079el.1:uc0079es.1:uc0079ev.1:uc0079   | TBC1     | TBC1 domain family, member 31                                          |
| uc0079mp.1:uc0079mq.1:uc0079ms.1:uc0      | Tace     | tubulin-specific chaperone E                                           |
| uc011zw.1                                 | Tbrg3    | transforming growth factor beta regulated gene 3                       |
| uc0089yz.1:uc0089zy.1                     | Tchp     | trichoplein, keratin filament binding                                  |
| uc0079kr.1:uc0079ks.1                     | Tcp112   | t-complex 11 (mouse) like 2                                            |
| uc0079of.2:uc0079og.2:uc0079oh.1:uc007    | Tdp1     | tyrosyl-DNA phosphodiesterase 1                                        |
| uc0089ag.1:uc0089agj.1:uc0079hej.1        | Teac     | teacotin                                                               |
| uc0089kb.1:uc0089ka.1:uc0089kc.1          | Tex15    | testis expressed gene 15                                               |
| uc0089nk.2:uc0089nj.2                     | Tgfa     | transforming growth factor alpha                                       |
| uc0089tz.2:uc0089ma.2                     | Tgfr3    | transforming growth factor, beta receptor III                          |
| uc0089yx.2:uc0089yy.2                     | Thsd4    | thrombospondin, type I, domain containing 4                            |
| uc0089ay.2                                | Thsd7a   | thrombospondin, type I, domain containing 7A                           |
| uc0089ak.1:uc0089del.1                    | Thumpr5  | THUMP domain containing 3                                              |
| uc0089dj.1                                | Tigd2    | ligger transposable element derived 2                                  |
| uc0079hp.1                                | Tigd5    | ligger transposable element derived 5                                  |
| uc0089pt.1:uc0089ps.1:uc0089qbr.1         | Tpin     | timeless interacting protein                                           |
| uc0079wm.1                                | Tmem100  | transmembrane protein 100                                              |
| uc0079ym.1:uc0079yn.1                     | Tmem117  | transmembrane protein 117                                              |
| uc0079yc.1                                | Tmem186  | transmembrane protein 186                                              |
| uc0089pd.1:uc0089pe.1:uc0089pf.1:uc008    | Tmem2    | transmembrane protein 2                                                |
| uc0089gc.1:uc0089gd.1                     | Tmem216  | transmembrane protein 216                                              |
| uc0089na.1:uc012gky.1                     | Tmem231  | transmembrane protein 231                                              |
| uc0079zf.1:uc0079ze.1                     | Tmem39a  | transmembrane protein 39a                                              |
| uc0089aw.1:uc012dcd.1:uc012dcd.1          | Tmem8b   | transmembrane protein 8B                                               |
| uc0079na.2:uc0079nb.2                     | Tnfrsf3  | tumor necrosis factor, alpha-induced protein 3                         |
| uc0089dt.2                                | Tnfrsf81 | tumor necrosis factor, alpha-induced protein 8-like 1                  |
| uc0079ba.2                                | Tnr      | tenascin R                                                             |
| uc0079wm.1:uc0079wn.1                     | Tob2     | transducer of ERBB2, 2                                                 |
| uc0089ru.2:uc0089rv.1:uc0089ru.1          | Tox      | thymocyte selection-associated high mobility group box                 |
| uc0079el.1:uc011kq.1:uc011kcl.1:uc0079e   | Tp53d21  | tumor protein D52-like 1                                               |
| uc0089zuc.2:uc0089zud.2                   | Tpst1    | protein-tyrosine sulfotransferase 1                                    |
| uc0079ax.2:uc0079ay.2                     | Traf3p1  | TRAF3 interacting protein 1                                            |
| uc0079wa.1                                | Traf3p2  | TRAF3 interacting protein 2                                            |
| uc0079cc.1:uc0079cy.1:uc011xvj.1:uc0079   | Trip11   | tripartite motif-containing 11                                         |
| uc0089ev.2:uc012bcp.1                     | Trip16   | tripartite motif-containing 16                                         |
| uc0089qz.2:uc0089ra.2:uc0089qz.2          | Trip45   | tripartite motif-containing 45                                         |
| uc0079pd.2:uc0079pf.1                     | Trip7    | tripartite motif-containing 7                                          |
| uc0089ur.1:uc0089us.1                     | Trit1    | RNA isopentenyltransferase 1                                           |
| uc0079vp.1                                | Trrt12   | RNA methyltransferase 12                                               |
| uc0089ht.1:uc0089hu.1                     | Trip5311 | transformation related protein 53 inducible protein 11                 |
| uc0079ym.2:uc0079yo.2:uc0079yq.2:uc007    | Trip63   | transformation related protein 63                                      |
| uc0089kj.1                                | Tshz3    | teashirt zinc finger family member 3                                   |
| uc012aql.1:uc0089bar.1                    | Tspan12  | tetraspanin 12                                                         |
| uc011wvd.1                                | Tst2     | thiosulfate sulfurtransferase (rhodanese)-like domain containing 1     |
| uc0089fl.1:uc0089gu.1:uc0089gv.1          | Tct17    | tetratricopeptide repeat domain 17                                     |
| uc0089ew.2                                | Tctd1a1  | tetratricopeptide repeat domain 30A1                                   |
| uc012daj.1                                | Tctd3    | tetratricopeptide repeat domain 34                                     |
| uc0089kv.1:uc0089kw.1:uc0089ka.1          | Tctd39b  | tetratricopeptide repeat domain 39B                                    |
| uc0089zk.1                                | Tct1     | transcription termination factor, RNA polymerase I                     |
| uc0089nw.2:uc012czi.1:uc0089nx.1:uc012c   | Tct7     | tubulin tyrosine ligase-like family, member 7                          |
| uc012huc.1:uc0089gm.2:uc0089gl.2:uc005    | Tubgcp2  | tubulin, gamma complex associated protein 2                            |
| uc0089ml.1:uc012cp.1:uc0089mw.1:uc011     | Tubgcp3  | tubulin, gamma complex associated protein 3                            |
| uc0089dh.1:uc0089ed.1                     | Tubp3    | tubby-like protein 3                                                   |
| uc012czw.1:uc0089uo.2                     | Tyao3    | RNA- <i>YW</i> synthesizing protein 3 homolog (S. cerevisiae)          |
| uc0089pc.1                                | Uba2cbp  | ubiquitin-conjugating enzyme E2C binding protein                       |
| uc0089wb.1:uc012dmq.1                     | Ubxm11   | UBX domain protein 11                                                  |
| uc012huc.1:uc0089sy.2:uc0089scx.2:uc012   | Ulk4     | unc-51-like kinase 4                                                   |
| uc0089qb.1                                | Uln13c   | unc-13 homolog C (C. elegans)                                          |
| uc0079gm.1:uc0079gp.1:uc0079gn.1:uc00     | Usp15    | ubiquitin specific peptidase 15                                        |
| uc0089ku.1:uc0089kv.1:uc0089kw.1:uc012    | Vac14    | Vac14 homolog (S. cerevisiae)                                          |
| uc0089dz.2:uc0089dy.1:uc0089dx.1:uc0089   | Vamp1    | vesicle-associated membrane protein 1                                  |
| uc0079xz.2                                | Vasn     | vasonin                                                                |
| uc0089fw.1:uc0089gw.1:uc0089gv.1:uc00     | Vacu15a  | vacuolar protein sorting 15A (yeast)                                   |
| uc0079az.1:uc0079ad.1:uc0079ac.1:uc007    | Vrk1     | vaccinia related kinase 1                                              |
| uc0089gb.1:uc0089gc.1:uc0089gd.1          | Vrk3     | vaccinia related kinase 3                                              |
| uc0089na.1:uc0089njz.1                    | Vwa3a    | von Willebrand factor A domain containing 3A                           |
| uc0089gm.1:uc0089gn.1:uc0089qco.1         | Vwa9     | von Willebrand factor A domain containing 9                            |
| uc0089hu.1:uc0089iu.1:uc0089je.1          | Wd5f1    | WD repeat domain 31                                                    |
| uc0089j.1                                 | Wes1     | WEE1 homolog 1 (S. pombe)                                              |
| uc0089kv.2:uc0089kw.2:uc012bpu.1:uc0089   | Whn11    | wingless-related MMTV integration site 11                              |
| uc0089nc.2:uc0089nd.2                     | Wwox     | WW domain-containing oxidoreductase                                    |
| uc0089hl.1                                | Xir3b    | X-linked lymphocyte-regulated 3B                                       |
| uc0079wy.1:uc0079wz.1                     | Xrc6     | X-ray repair complementing defective repair in Chinese hamster cells 6 |
| uc0089jj.1:uc0089jm.1                     | Xyf11    | xylyltransferase 1                                                     |
| uc0079ka.2                                | Xyf2     | xylyltransferase II                                                    |
| uc0089hu.1                                | Znf34    | zinc finger and BTB domain containing 34                               |
| uc0089wy.1:uc0089wz.1                     | Znf88b   | zinc finger and BTB domain containing 8b                               |
| uc0079nl.1                                | Zc3h10   | zinc finger CCH type containing 10                                     |
| uc0089ma.2:uc0089mc.2                     | Zc3h6    | zinc finger CCH type containing 6                                      |
| uc0089ka.1:uc0089kb.1:uc0089kc.1:uc0089   | Zc4c4    | zinc finger, CCHC domain containing 4                                  |
| uc0089oa.1                                | Zfx4     | zinc finger homeodomain 4                                              |
| uc0089ky.1:uc0089kj.1                     | Zfp101   | zinc finger protein 101                                                |
| uc0089fl.1                                | Zfp105   | zinc finger protein 105                                                |
| uc0089kv.1:uc0089ju.1:uc0089kl.1          | Zfp12    | zinc finger protein 12                                                 |
| uc0089dl.1:uc0089dm.1                     | Zfp239   | zinc finger protein 239                                                |
| uc0089li.1                                | Zfp28    | zinc finger protein 28                                                 |
| uc0079j.1:uc0079k.1:uc0079l.1             | Zfp287   | zinc finger protein 287                                                |
| uc0089ea.1:uc012exd.1:uc0089ef.1          | Zfp324   | zinc finger protein 324                                                |
| uc0089tw.1:uc0089tx.1                     | Zfp37    | zinc finger protein 37                                                 |
| uc0079cn.1                                | Zfp39    | zinc finger protein 39                                                 |
| uc012baq.1:uc012baj.1:uc0089wh.1          | Zfp498   | zinc finger protein 498                                                |
| uc0089gck.2:uc0089gcl.2                   | Zfp420   | zinc finger protein 420                                                |
| uc0089ar.1:uc0089aq.1:uc0089aq.1          | Zfp53    | zinc finger protein 53                                                 |
| uc0089lp.2                                | Zfp592   | zinc finger protein 592                                                |
| uc0089pl.1                                | Zfp61    | zinc finger protein 61                                                 |
| uc0079pw.1:uc0079px.1:uc0079py.1:uc0079   | Zfp62    | zinc finger protein 62                                                 |
| uc0089cl.1:uc0089ck.1:uc0089co.1          | Zfp64    | zinc finger protein 64                                                 |
| uc0089nd.2                                | Zfp719   | zinc finger protein 719                                                |
| uc0089km.1:uc0089kl.1                     | Zfp780b  | zinc finger protein 780b                                               |
| uc0079ca.2:uc011yau.1                     | Zfp839   | zinc finger protein 839                                                |
| uc0079ba.2                                | Zfp87    | zinc finger protein 87                                                 |
| uc0089ru.1                                | Zfp930   | zinc finger protein 930                                                |
| uc0079wv.2:uc0079wx.2:uc0079wz.2          | Zfp935   | zinc finger protein 935                                                |
| uc012abp.1:uc0089aq.2:uc0089arp.2         | Zfp944   | zinc finger protein 944                                                |
| uc012exo.1                                | Zfp954   | zinc finger protein 954                                                |
| uc0089sj.1                                | Zfpm1    | zinc finger protein, multitype 1                                       |
| uc0079wq.1:uc0079vr.1:uc0079vs.1          | Zfpm2    | zinc finger protein, multitype 2                                       |
| uc012exl.1:uc0089fv.1                     | Zmi1     | zinc finger, imprinted 1                                               |
| uc0079j.1:uc0079k.1:uc0079l.1             | Zscan6   | zinc finger with KRAB and SCAN domains 6                               |
| uc0089gk.1:uc0089gw.1:uc012hon.1:uc00     | Zmat1    | Zmat1 AKO38525                                                         |
| uc0079pd.1:uc0079pe.1:uc0079pf.1          | Zscan12  | zinc finger and SCAN domain containing 12                              |
| uc0079jp.2                                | Zawim7   | zinc finger SWIM-type containing 7                                     |
| uc0089pm.2:uc012gva.1                     | Zwlch    | zwlch kinetochore protein                                              |
